# Supplementary material for: Quantum effects in photosensitization: the case of singlet oxygen generation by thiothymines
Source: Royal Society of Chemistry journal article supplement (doi:10.1039/d2cp01337a), 2022-01-01
Supplement: d2cp01337a1.pdf [file d2cp01337a1.pdf]

*Supplemental Materials for:*

**Quantum effects in photosensitization: The case of singlet oxygen generation by thiothymines**

Meghna A. Manae<sup>a</sup> and Anirban Hazra

Department of Chemistry, Indian Institute of Science Education and Research Pune, Dr. Homi Bhabha Road, Pune 411008, Maharashtra, India

<sup>a</sup>meghna.manae@students.iiserpune.ac.in

TABLE S1. Values of  $FCWD$  integrated over different time intervals, for the three different thiothymines along select orientation directions and  $D$  values.

| $\tau$ | 2tThy ( $T_1^{ring}$ ) $\text{\AA}$<br>to2X, $D=2.6 \text{ \AA}$ | 4tThy ( $T_1^{ring}$ ) $\text{\AA}$<br>to56, $D=3.0 \text{ \AA}$ | dtThy ( $T_1^{ring}$ )<br>to4X, $D=3.6 \text{ \AA}$ |
|--------|------------------------------------------------------------------|------------------------------------------------------------------|-----------------------------------------------------|
| 30 fs  | 29.116                                                           | 52.152                                                           | 23.106                                              |
| 1 ps   | 6.595                                                            | 51.365                                                           | 32.371                                              |
| 2 ps   | 12.625                                                           | 63.475                                                           | 3.774                                               |
| 3 ps   | 3.678                                                            | 50.379                                                           | 30.902                                              |

TABLE S2. Value of  $FCWD$  with the use of different damping parameters for the  $T_1^{ring}$  structure of 4tThy along the to56 direction and  $D=3.0 \text{ \AA}$ , along with integration time, time taken for the function to get damped, and resulting photosensitization rate.

| $\eta \text{ (cm}^{-1}\text{)}$ | $FCWD$ | $k \text{ (s}^{-1}\text{)}$ | $t\text{-int}^a \text{ (fs)}$ | $t\text{-damp}^b \text{ (fs)}$ |
|---------------------------------|--------|-----------------------------|-------------------------------|--------------------------------|
| 0.5                             | 37.670 | $5.18 \times 10^6$          | 200                           | 55                             |
| 0.1                             | 37.670 | $5.18 \times 10^6$          | 200                           | 120                            |
| 0.05                            | 34.765 | $4.79 \times 10^6$          | 500                           | 180                            |
| 0.01                            | 29.562 | $4.07 \times 10^6$          | 500                           | 380                            |
| 0.005                           | 26.240 | $3.61 \times 10^6$          | 2500                          | 540                            |
| 0.001                           | 32.011 | $4.39 \times 10^6$          | 2500                          | 1200                           |
| 0.0005                          | 48.801 | $6.71 \times 10^6$          | 3000                          | 1750                           |

<sup>a</sup>Integration time, <sup>b</sup>time after which the function gets damped.

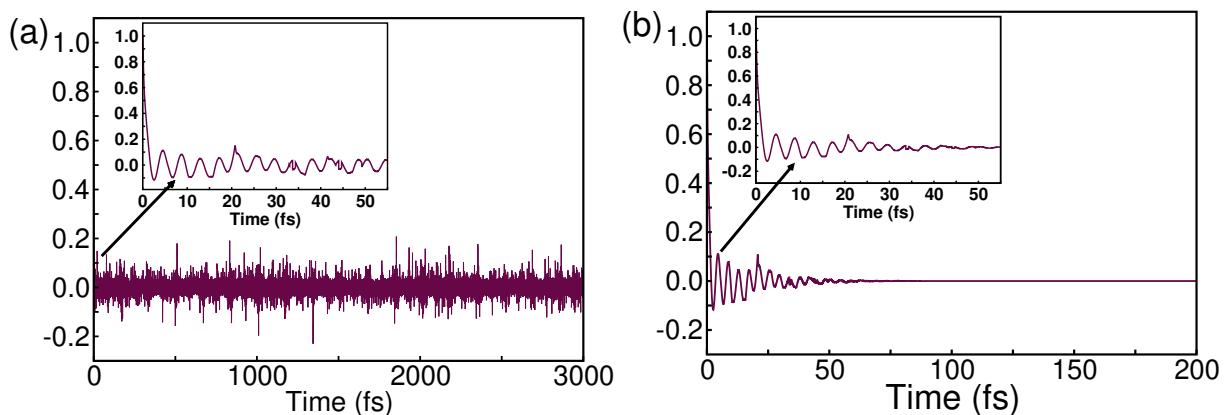

FIG. S1. The real parts of the  $FCWD(\tau)$  function without any damping factor in (a) and with a Gaussian damping factor of  $0.1 \text{ cm}^{-1}$  in (b) for the  $T_1^{ring}$  structure of 4tThy along the to56 direction and  $D=3.0 \text{ \AA}$ .

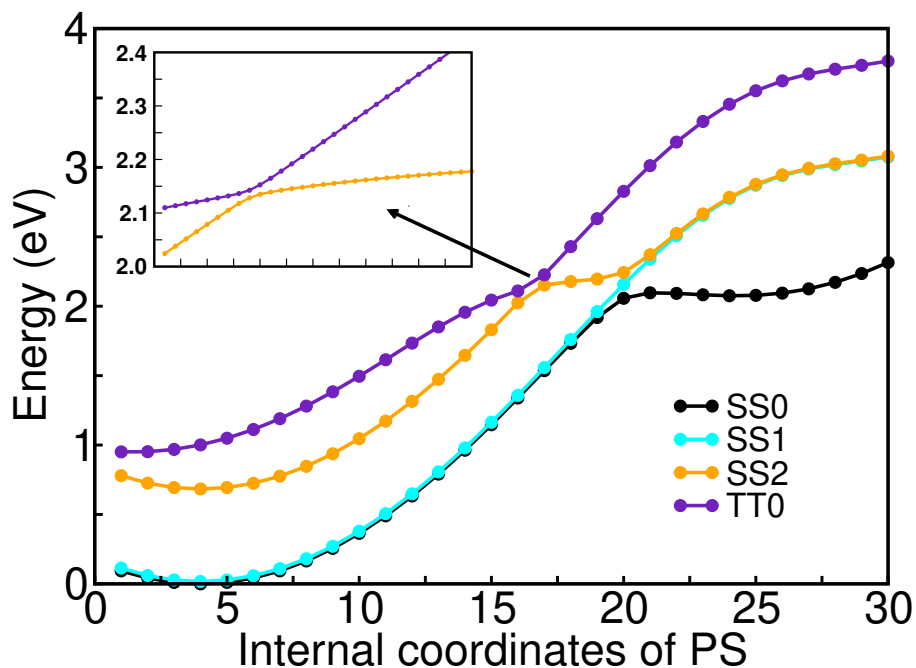

FIG. S2. Calculated adiabatic energies of states for the PS–O<sub>2</sub> composite system, along the internal coordinates of the PS which promote crossing. The PS considered here is the  $T_1^{ring}$  conformer of 4tThy, along the to4X approach direction, with a D value of 2.5 Å. The inset shows more densely calculated points close to the crossing between the TT0 and SS2 states. The diabatic coupling given as half of the energy gap at the crossing is 58.2 cm<sup>-1</sup>. The diabatic coupling calculated in the D space at this D is 27.6 cm<sup>-1</sup>.

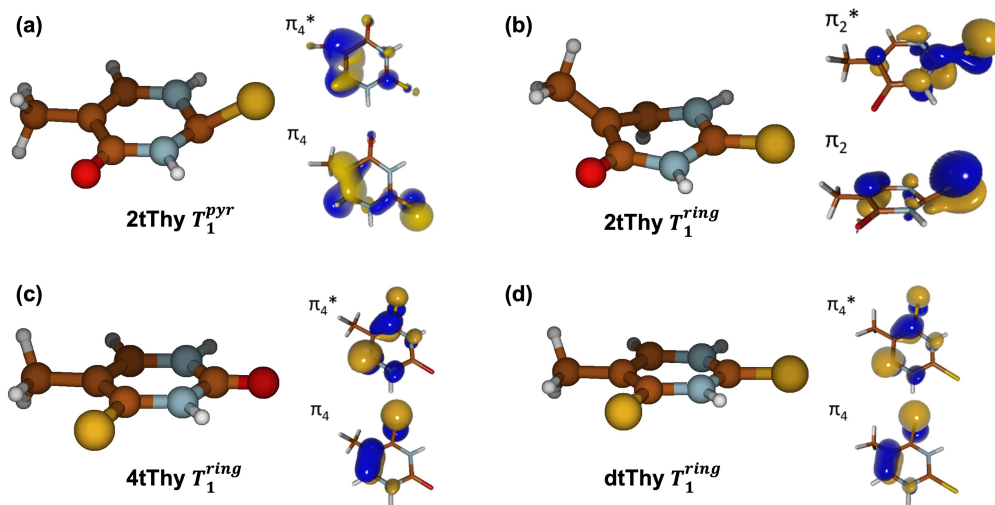

FIG. S3.  $T_1$  minima of the thiothymines studied in this work. Brown, gray, blue, red and yellow atoms indicate C, H, N, O and S. The orbitals involved in the respective  $T_1$  minima are shown alongside the structures.

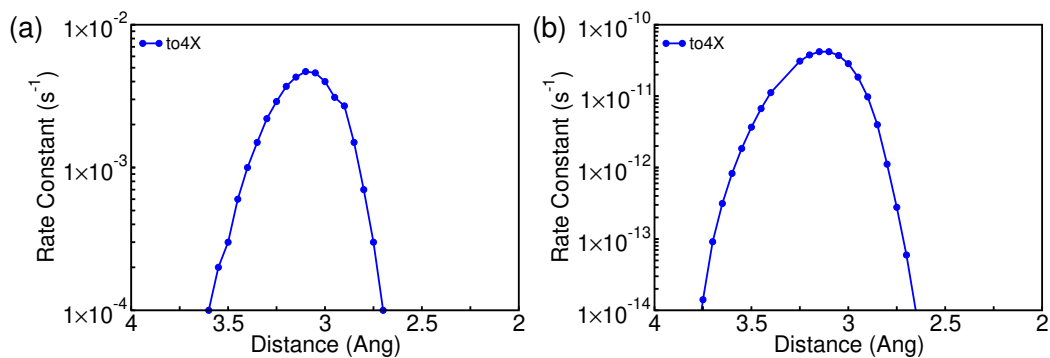

FIG. S4. Photosensitizing rate constants along the to4X direction as a function of D calculated using MT-FGR for  $T_1^{ring}$  minima of (a) 4tThy and (b) dtThy.

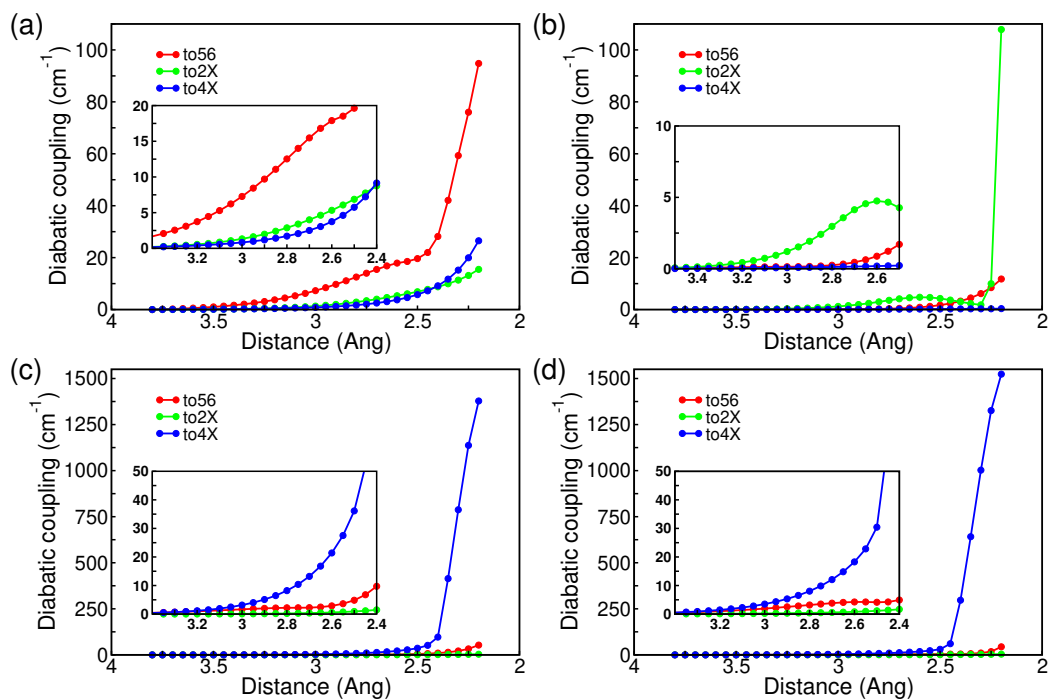

FIG. S5. Diabatic couplings plotted as a function of D for (a)  $T_1^{ring}$  and (b)  $T_1^{pyr}$  minima of 2tThy, and  $T_1^{ring}$  minimum of (c) 4tThy and (d) dtThy, for all 3 approach directions. Insets are shown for greater clarity.

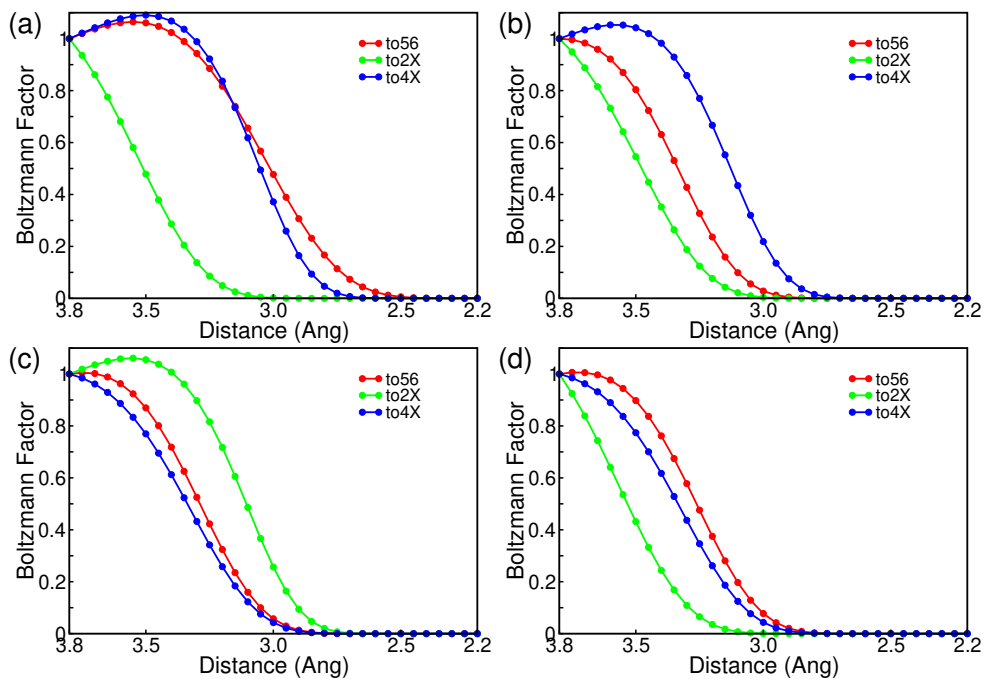

FIG. S6. Boltzmann factors plotted as a function of  $D$  for (a)  $T_1^{ring}$  and (b)  $T_1^{pyr}$  minima of 2tThy, and  $T_1^{ring}$  minimum of (c) 4tThy and (d) dtThy, for all 3 approach directions.

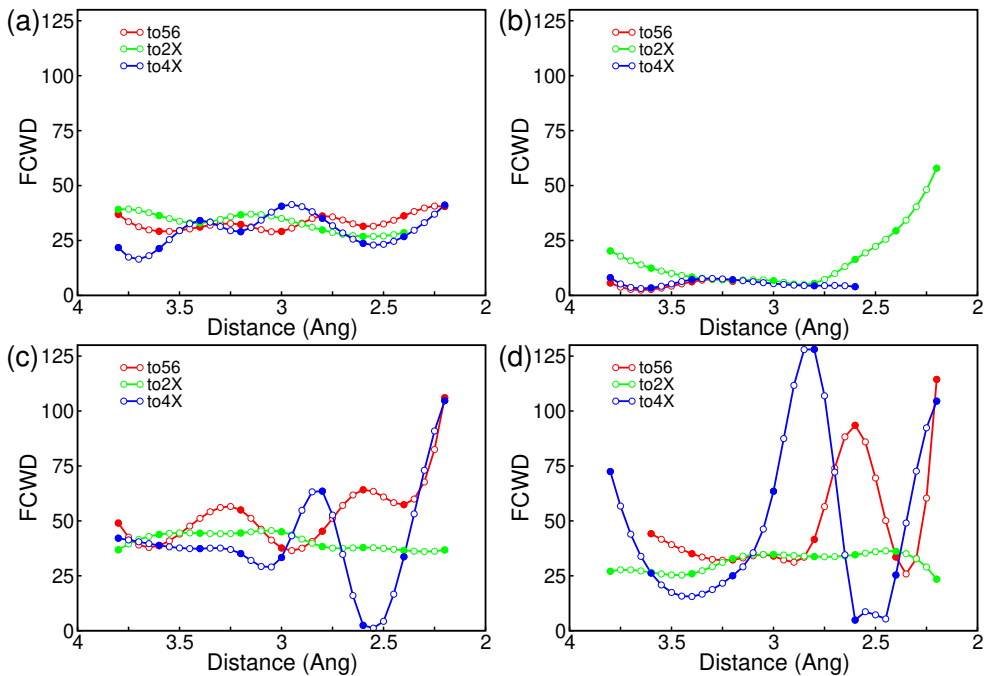

FIG. S7. FCWD values plotted as a function of  $D$  for (a)  $T_1^{ring}$  and (b)  $T_1^{pyr}$  minima of 2tThy, and  $T_1^{ring}$  minimum of (c) 4tThy and (d) dtThy, for all 3 approach directions. Filled circles indicate values where FCWD is calculated explicitly and unfilled circles indicate values where FCWD is interpolated.

Given below are geometries of the PS-02 complexes for all thiothymine studied in this work, given in internal coordinates

D=3.8 Angstrom for all structures given. The smallest D considered in this study is 2.2 Angstrom

2tThy T1\_ring to56

```
geometry={
c
n      1 nc2
c      2 cn3          1 cnc3
n      3 nc4          2 ncn4          1 dih4
c      4 cn5          3 cnc5          2 dih5
c      5 cc6          4 ccn6          3 dih6
s      3 sc7          2 scn7          1 dih7
o      5 oc8          4 ocn8          3 dih8
c      6 cc9          5 ccc9          4 dih9
h      9 hc10         6 hcc10         5 dih10
h      9 hc11         6 hcc11         5 dih11
h      9 hc12         6 hcc12         5 dih12
h      4 hn13         3 hnc13         2 dih13
h      2 hn14         3 hnc14         4 dih14
h      1 hc15         2 hcn15         3 dih15
o      6 oc16         5 occ16         4 dih16
o      16 oo17        6 ooc17         1 dih17
}
```

```
nc2=      1.389068 ANG
cn3=      1.353852 ANG
cnc3=     125.114000 DEGREE
nc4=      1.363948 ANG
ncn4=     115.296000 DEGREE
dih4=     349.223000 DEGREE
cn5=      1.398182 ANG
cnc5=     125.974000 DEGREE
dih5=     346.666000 DEGREE
cc6=      1.441623 ANG
ccn6=     115.750000 DEGREE
dih6=     15.259000 DEGREE
sc7=      1.656716 ANG
scn7=     122.242000 DEGREE
dih7=     169.354000 DEGREE
oc8=      1.211626 ANG
ocn8=     119.562000 DEGREE
dih8=     194.513000 DEGREE
cc9=      1.490007 ANG
ccc9=     122.242000 DEGREE
dih9=     187.610000 DEGREE
hc10=     1.088545 ANG
hcc10=    110.600000 DEGREE
dih10=    116.129000 DEGREE
hc11=     1.080598 ANG
hcc11=    110.796000 DEGREE
dih11=    355.413000 DEGREE
hc12=     1.087650 ANG
hcc12=    110.526000 DEGREE
dih12=    234.636000 DEGREE
hn13=     0.996027 ANG
hnc13=    116.217000 DEGREE
dih13=    182.819000 DEGREE
hn14=     0.995308 ANG
hnc14=    114.507000 DEGREE
dih14=    181.704000 DEGREE
hc15=     1.074910 ANG
hcn15=    114.213000 DEGREE
dih15=    167.897000 DEGREE
oc16=     3.800000 ANG
occ16=    90.000000 DEGREE
dih16=    90.000000 DEGREE
oo17=     1.210000 ANG
```

ooc17= 95.000000 DEGREE  
dih17= 0.000000 DEGREE

2tThy T1\_ring to2X

```
geometry={  
  c  
  n      1 nc2  
  c      2 cn3          1 cnc3  
  n      3 nc4          2 ncn4          1 dih4  
  c      4 cn5          3 cnc5          2 dih5  
  c      5 cc6          4 ccn6          3 dih6  
  s      3 sc7          2 scn7          1 dih7  
  o      5 oc8          4 ocn8          3 dih8  
  c      6 cc9          5 ccc9          4 dih9  
  h      9 hc10         6 hcc10         5 dih10  
  h      9 hc11         6 hcc11         5 dih11  
  h      9 hc12         6 hcc12         5 dih12  
  h      4 hn13         3 hnc13         2 dih13  
  h      2 hn14         3 hnc14         4 dih14  
  h      1 hc15         2 hcn15         3 dih15  
  o      7 os16         3 osc16         2 dih16  
  o      16 oo17        7 oos17         3 dih17  
}
```

nc2= 1.389068 ANG  
cn3= 1.353852 ANG  
cnc3= 125.114000 DEGREE  
nc4= 1.363948 ANG  
ncn4= 115.296000 DEGREE  
dih4= 349.223000 DEGREE  
cn5= 1.398182 ANG  
cnc5= 125.974000 DEGREE  
dih5= 346.666000 DEGREE  
cc6= 1.441623 ANG  
ccn6= 115.750000 DEGREE  
dih6= 15.259000 DEGREE  
sc7= 1.656716 ANG  
scn7= 122.242000 DEGREE  
dih7= 169.354000 DEGREE  
oc8= 1.211626 ANG  
ocn8= 119.562000 DEGREE  
dih8= 194.513000 DEGREE  
cc9= 1.490007 ANG  
ccc9= 122.242000 DEGREE  
dih9= 187.610000 DEGREE  
hc10= 1.088545 ANG  
hcc10= 110.600000 DEGREE  
dih10= 116.129000 DEGREE  
hc11= 1.080598 ANG  
hcc11= 110.796000 DEGREE  
dih11= 355.413000 DEGREE  
hc12= 1.087650 ANG  
hcc12= 110.526000 DEGREE  
dih12= 234.636000 DEGREE  
hn13= 0.996027 ANG  
hnc13= 116.217000 DEGREE  
dih13= 182.819000 DEGREE  
hn14= 0.995308 ANG  
hnc14= 114.507000 DEGREE  
dih14= 181.704000 DEGREE  
hc15= 1.074910 ANG  
hcn15= 114.213000 DEGREE  
dih15= 167.897000 DEGREE  
os16= 3.800000 ANG  
osc16= 90.000000 DEGREE  
dih16= 90.000000 DEGREE  
oo17= 1.210000 ANG  
oos17= 90.000000 DEGREE  
dih17= 0.000000 DEGREE

2tThy T1\_ring to4X

```
geometry={
  c
  n      1 nc2
  c      2 cn3          1 cnc3
  n      3 nc4          2 ncn4          1 dih4
  c      4 cn5          3 cnc5          2 dih5
  c      5 cc6          4 ccn6          3 dih6
  s      3 sc7          2 scn7          1 dih7
  o      5 oc8          4 ocn8          3 dih8
  c      6 cc9          5 ccc9          4 dih9
  h      9 hc10         6 hcc10         5 dih10
  h      9 hc11         6 hcc11         5 dih11
  h      9 hc12         6 hcc12         5 dih12
  h      4 hn13         3 hnc13         2 dih13
  h      2 hn14         3 hnc14         4 dih14
  h      1 hc15         2 hcn15         3 dih15
  o      8 oo16         5 ooc16         6 dih16
  o      16 oo17        8 ooo17         5 dih17
}
```

```
nc2=      1.389068 ANG
cn3=      1.353852 ANG
cnc3=     125.114000 DEGREE
nc4=      1.363948 ANG
ncn4=     115.296000 DEGREE
dih4=     349.223000 DEGREE
cn5=      1.398182 ANG
cnc5=     125.974000 DEGREE
dih5=     346.666000 DEGREE
cc6=      1.441623 ANG
ccn6=     115.750000 DEGREE
dih6=     15.259000 DEGREE
sc7=      1.656716 ANG
scn7=     122.242000 DEGREE
dih7=     169.354000 DEGREE
oc8=      1.211626 ANG
ocn8=     119.562000 DEGREE
dih8=     194.513000 DEGREE
cc9=      1.490007 ANG
ccc9=     122.242000 DEGREE
dih9=     187.610000 DEGREE
hc10=     1.088545 ANG
hcc10=    110.600000 DEGREE
dih10=    116.129000 DEGREE
hc11=     1.080598 ANG
hcc11=    110.796000 DEGREE
dih11=    355.413000 DEGREE
hc12=     1.087650 ANG
hcc12=    110.526000 DEGREE
dih12=    234.636000 DEGREE
hn13=     0.996027 ANG
hnc13=    116.217000 DEGREE
dih13=    182.819000 DEGREE
hn14=     0.995308 ANG
hnc14=    114.507000 DEGREE
dih14=    181.704000 DEGREE
hc15=     1.074910 ANG
hcn15=    114.213000 DEGREE
dih15=    167.897000 DEGREE
oo16=     3.800000 ANG
ooc16=    90.000000 DEGREE
dih16=    90.000000 DEGREE
oo17=     1.210000 ANG
ooo17=    90.000000 DEGREE
dih17=    0.000000 DEGREE
```

2tThy T1\_pyr to56

```
geometry={
```



```

c
n      1 nc2
c      2 cn3          1 cnc3
n      3 nc4          2 ncn4          1 dih4
c      4 cn5          3 cnc5          2 dih5
c      5 cc6          4 ccn6          3 dih6
s      3 sc7          2 scn7          1 dih7
o      5 oc8          4 ocn8          3 dih8
c      6 cc9          5 ccc9          4 dih9
h      9 hc10         6 hcc10         5 dih10
h      9 hc11         6 hcc11         5 dih11
h      9 hc12         6 hcc12         5 dih12
h      4 hn13         3 hnc13         2 dih13
h      2 hn14         3 hnc14         4 dih14
h      1 hc15         2 hcn15         3 dih15
o      6 oc16         5 occ16         4 dih16
o      16 oo17        6 ooc17         1 dih17
}

```

```

nc2=      1.377667 ANG
cn3=      1.388245 ANG
cnc3=     122.460000 DEGREE
nc4=      1.397746 ANG
ncn4=     113.037000 DEGREE
dih4=     344.825000 DEGREE
cn5=      1.379316 ANG
cnc5=     126.541000 DEGREE
dih5=     16.101000 DEGREE
cc6=      1.474617 ANG
ccn6=     115.383000 DEGREE
dih6=     350.993000 DEGREE
sc7=      1.818599 ANG
scn7=     111.801000 DEGREE
dih7=     211.706000 DEGREE
oc8=      1.206515 ANG
ocn8=     120.862000 DEGREE
dih8=     171.944000 DEGREE
cc9=      1.502361 ANG
ccc9=     118.181000 DEGREE
dih9=     181.315000 DEGREE
hc10=     1.084472 ANG
hcc10=    110.888000 DEGREE
dih10=    58.975000 DEGREE
hc11=     1.084469 ANG
hcc11=    110.864000 DEGREE
dih11=    300.036000 DEGREE
hc12=     1.084344 ANG
hcc12=    110.842000 DEGREE
dih12=    179.514000 DEGREE
hn13=     0.995137 ANG
hnc13=    117.350000 DEGREE
dih13=    185.247000 DEGREE
hn14=     0.992901 ANG
hnc14=    116.155000 DEGREE
dih14=    183.985000 DEGREE
hc15=     1.073720 ANG
hcn15=    114.980000 DEGREE
dih15=    187.604000 DEGREE
oc16=     3.800000 ANG
occ16=    90.000000 DEGREE
dih16=    90.000000 DEGREE
oo17=     1.210000 ANG
ooc17=    90.000000 DEGREE
dih17=    0.000000 DEGREE

```

2tThy T1\_pyr to2X

```

geometry={
c
n      1 nc2
c      2 cn3          1 cnc3

```

```

n      3 nc4          2 ncn4          1 dih4
c      4 cn5          3 cnc5          2 dih5
c      5 cc6          4 ccn6          3 dih6
s      3 sc7          2 scn7          1 dih7
o      5 oc8          4 ocn8          3 dih8
c      6 cc9          5 ccc9          4 dih9
h      9 hc10         6 hcc10         5 dih10
h      9 hc11         6 hcc11         5 dih11
h      9 hc12         6 hcc12         5 dih12
h      4 hn13         3 hnc13         2 dih13
h      2 hn14         3 hnc14         4 dih14
h      1 hc15         2 hcn15         3 dih15
o      7 os16         3 osc16         2 dih16
o      16 oo17        7 oos17         3 dih17
}

```

```

nc2=      1.377667 ANG
cn3=      1.388245 ANG
cnc3=     122.460000 DEGREE
nc4=      1.397746 ANG
ncn4=     113.037000 DEGREE
dih4=     344.825000 DEGREE
cn5=      1.379316 ANG
cnc5=     126.541000 DEGREE
dih5=     16.101000 DEGREE
cc6=      1.474617 ANG
ccn6=     115.383000 DEGREE
dih6=     350.993000 DEGREE
sc7=      1.818599 ANG
scn7=     111.801000 DEGREE
dih7=     211.706000 DEGREE
oc8=      1.206515 ANG
ocn8=     120.862000 DEGREE
dih8=     171.944000 DEGREE
cc9=      1.502361 ANG
ccc9=     118.181000 DEGREE
dih9=     181.315000 DEGREE
hc10=     1.084472 ANG
hcc10=    110.888000 DEGREE
dih10=    58.975000 DEGREE
hc11=     1.084469 ANG
hcc11=    110.864000 DEGREE
dih11=    300.036000 DEGREE
hc12=     1.084344 ANG
hcc12=    110.842000 DEGREE
dih12=    179.514000 DEGREE
hn13=     0.995137 ANG
hnc13=    117.350000 DEGREE
dih13=    185.247000 DEGREE
hn14=     0.992901 ANG
hnc14=    116.155000 DEGREE
dih14=    183.985000 DEGREE
hc15=     1.073720 ANG
hcn15=    114.980000 DEGREE
dih15=    187.604000 DEGREE
os16=     3.800000 ANG
osc16=    90.000000 DEGREE
dih16=    65.000000 DEGREE
oo17=     1.210000 ANG
oos17=    87.500000 DEGREE
dih17=    0.000000 DEGREE

```

2tThy T1\_pyr to4X

```

geometry={
c
n      1 nc2
c      2 cn3          1 cnc3
n      3 nc4          2 ncn4          1 dih4
c      4 cn5          3 cnc5          2 dih5
c      5 cc6          4 ccn6          3 dih6

```

|   |    |      |   |       |   |       |
|---|----|------|---|-------|---|-------|
| s | 3  | sc7  | 2 | scn7  | 1 | dih7  |
| o | 5  | oc8  | 4 | ocn8  | 3 | dih8  |
| c | 6  | cc9  | 5 | ccc9  | 4 | dih9  |
| h | 9  | hc10 | 6 | hcc10 | 5 | dih10 |
| h | 9  | hc11 | 6 | hcc11 | 5 | dih11 |
| h | 9  | hc12 | 6 | hcc12 | 5 | dih12 |
| h | 4  | hn13 | 3 | hnc13 | 2 | dih13 |
| h | 2  | hn14 | 3 | hnc14 | 4 | dih14 |
| h | 1  | hc15 | 2 | hcn15 | 3 | dih15 |
| o | 8  | oo16 | 5 | ooc16 | 6 | dih16 |
| o | 16 | oo17 | 8 | ooo17 | 5 | dih17 |

|        |            |        |
|--------|------------|--------|
| nc2=   | 1.377667   | ANG    |
| cn3=   | 1.388245   | ANG    |
| cnc3=  | 122.460000 | DEGREE |
| nc4=   | 1.397746   | ANG    |
| ncn4=  | 113.037000 | DEGREE |
| dih4=  | 344.825000 | DEGREE |
| cn5=   | 1.379316   | ANG    |
| cnc5=  | 126.541000 | DEGREE |
| dih5=  | 16.101000  | DEGREE |
| cc6=   | 1.474617   | ANG    |
| ccn6=  | 115.383000 | DEGREE |
| dih6=  | 350.993000 | DEGREE |
| sc7=   | 1.818599   | ANG    |
| scn7=  | 111.801000 | DEGREE |
| dih7=  | 211.706000 | DEGREE |
| oc8=   | 1.206515   | ANG    |
| ocn8=  | 120.862000 | DEGREE |
| dih8=  | 171.944000 | DEGREE |
| cc9=   | 1.502361   | ANG    |
| ccc9=  | 118.181000 | DEGREE |
| dih9=  | 181.315000 | DEGREE |
| hc10=  | 1.084472   | ANG    |
| hcc10= | 110.888000 | DEGREE |
| dih10= | 58.975000  | DEGREE |
| hc11=  | 1.084469   | ANG    |
| hcc11= | 110.864000 | DEGREE |
| dih11= | 300.036000 | DEGREE |
| hc12=  | 1.084344   | ANG    |
| hcc12= | 110.842000 | DEGREE |
| dih12= | 179.514000 | DEGREE |
| hn13=  | 0.995137   | ANG    |
| hnc13= | 117.350000 | DEGREE |
| dih13= | 185.247000 | DEGREE |
| hn14=  | 0.992901   | ANG    |
| hnc14= | 116.155000 | DEGREE |
| dih14= | 183.985000 | DEGREE |
| hc15=  | 1.073720   | ANG    |
| hcn15= | 114.980000 | DEGREE |
| dih15= | 187.604000 | DEGREE |
| oo16=  | 3.800000   | ANG    |
| ooc16= | 90.000000  | DEGREE |
| dih16= | 90.000000  | DEGREE |
| oo17=  | 1.210000   | ANG    |
| ooo17= | 90.000000  | DEGREE |
| dih17= | 0.000000   | DEGREE |

4tThy T1\_ring to56

```

geometry={
c
n      1 nc2
c      2 cn3          1 cnc3
n      3 nc4          2 ncn4          1 dih4
c      4 cn5          3 cnc5          2 dih5
c      5 cc6          4 ccn6          3 dih6
o      3 oc7          2 ocn7          1 dih7
s      5 sc8          4 scn8          3 dih8
c      6 cc9          5 ccc9          4 dih9

```

|   |    |      |   |       |   |       |
|---|----|------|---|-------|---|-------|
| h | 9  | hc10 | 6 | hcc10 | 5 | dih10 |
| h | 9  | hc11 | 6 | hcc11 | 5 | dih11 |
| h | 9  | hc12 | 6 | hcc12 | 5 | dih12 |
| h | 4  | hn13 | 3 | hnc13 | 2 | dih13 |
| h | 2  | hn14 | 3 | hnc14 | 4 | dih14 |
| h | 1  | hc15 | 2 | hcn15 | 3 | dih15 |
| o | 6  | oc16 | 5 | occ16 | 4 | dih16 |
| o | 16 | oo17 | 6 | ooc17 | 1 | dih17 |

|        |            |        |
|--------|------------|--------|
| nc2=   | 1.389237   | ANG    |
| cn3=   | 1.370827   | ANG    |
| cnc3=  | 124.437000 | DEGREE |
| nc4=   | 1.369467   | ANG    |
| ncn4=  | 114.189000 | DEGREE |
| dih4=  | 359.583000 | DEGREE |
| cn5=   | 1.403419   | ANG    |
| cnc5=  | 124.924000 | DEGREE |
| dih5=  | 0.439000   | DEGREE |
| cc6=   | 1.376884   | ANG    |
| ccn6=  | 119.453000 | DEGREE |
| dih6=  | 359.657000 | DEGREE |
| oc7=   | 1.202657   | ANG    |
| ocn7=  | 122.822000 | DEGREE |
| dih7=  | 179.600000 | DEGREE |
| sc8=   | 1.766416   | ANG    |
| scn8=  | 115.290000 | DEGREE |
| dih8=  | 177.691000 | DEGREE |
| cc9=   | 1.509355   | ANG    |
| ccc9=  | 123.861000 | DEGREE |
| dih9=  | 178.285000 | DEGREE |
| hc10=  | 1.080934   | ANG    |
| hcc10= | 111.652000 | DEGREE |
| dih10= | 37.245000  | DEGREE |
| hc11=  | 1.085441   | ANG    |
| hcc11= | 111.093000 | DEGREE |
| dih11= | 276.808000 | DEGREE |
| hc12=  | 1.083936   | ANG    |
| hcc12= | 110.116000 | DEGREE |
| dih12= | 157.445000 | DEGREE |
| hn13=  | 0.993278   | ANG    |
| hnc13= | 115.635000 | DEGREE |
| dih13= | 178.824000 | DEGREE |
| hn14=  | 0.993131   | ANG    |
| hnc14= | 115.019000 | DEGREE |
| dih14= | 179.921000 | DEGREE |
| hc15=  | 1.068959   | ANG    |
| hcn15= | 116.837000 | DEGREE |
| dih15= | 179.087000 | DEGREE |
| oc16=  | 3.800000   | ANG    |
| occ16= | 90.000000  | DEGREE |
| dih16= | 90.000000  | DEGREE |
| oo17=  | 1.210000   | ANG    |
| ooc17= | 90.000000  | DEGREE |
| dih17= | 0.000000   | DEGREE |

4tThy T1\_ring to2X

```

geometry={
  c
  n      1 nc2
  c      2 cn3          1 cnc3
  n      3 nc4          2 ncn4          1 dih4
  c      4 cn5          3 cnc5          2 dih5
  c      5 cc6          4 ccn6          3 dih6
  o      3 oc7          2 ocn7          1 dih7
  s      5 sc8          4 scn8          3 dih8
  c      6 cc9          5 ccc9          4 dih9
  h      9 hc10         6 hcc10         5 dih10
  h      9 hc11         6 hcc11         5 dih11
  h      9 hc12         6 hcc12         5 dih12

```

```

h      4 hn13      3 hnc13      2 dih13
h      2 hn14      3 hnc14      4 dih14
h      1 hc15      2 hcn15      3 dih15
o      7 oo16      3 ooc16      2 dih16
o     16 oo17      7 ooo17      3 dih17
}

```

```

nc2=      1.389237 ANG
cn3=      1.370827 ANG
cnc3=     124.437000 DEGREE
nc4=      1.369467 ANG
ncn4=     114.189000 DEGREE
dih4=     359.583000 DEGREE
cn5=      1.403419 ANG
cnc5=     124.924000 DEGREE
dih5=     0.439000 DEGREE
cc6=      1.376884 ANG
ccn6=     119.453000 DEGREE
dih6=     359.657000 DEGREE
oc7=      1.202657 ANG
ocn7=     122.822000 DEGREE
dih7=     179.600000 DEGREE
sc8=      1.766416 ANG
scn8=     115.290000 DEGREE
dih8=     177.691000 DEGREE
cc9=      1.509355 ANG
ccc9=     123.861000 DEGREE
dih9=     178.285000 DEGREE
hc10=     1.080934 ANG
hcc10=    111.652000 DEGREE
dih10=    37.245000 DEGREE
hc11=     1.085441 ANG
hcc11=    111.093000 DEGREE
dih11=    276.808000 DEGREE
hc12=     1.083936 ANG
hcc12=    110.116000 DEGREE
dih12=    157.445000 DEGREE
hn13=     0.993278 ANG
hnc13=    115.635000 DEGREE
dih13=    178.824000 DEGREE
hn14=     0.993131 ANG
hnc14=    115.019000 DEGREE
dih14=    179.921000 DEGREE
hc15=     1.068959 ANG
hcn15=    116.837000 DEGREE
dih15=    179.087000 DEGREE
oo16=     3.800000 ANG
ooc16=    90.000000 DEGREE
dih16=    90.000000 DEGREE
oo17=     1.210000 ANG
ooo17=    90.000000 DEGREE
dih17=    0.000000 DEGREE

```

4tThy T1\_ring to4X

```

geometry={
c
n      1 nc2
c      2 cn3      1 cnc3
n      3 nc4      2 ncn4      1 dih4
c      4 cn5      3 cnc5      2 dih5
c      5 cc6      4 ccn6      3 dih6
o      3 oc7      2 ocn7      1 dih7
s      5 sc8      4 scn8      3 dih8
c      6 cc9      5 ccc9      4 dih9
h      9 hc10     6 hcc10     5 dih10
h      9 hc11     6 hcc11     5 dih11
h      9 hc12     6 hcc12     5 dih12
h      4 hn13     3 hnc13     2 dih13
h      2 hn14     3 hnc14     4 dih14
h      1 hc15     2 hcn15     3 dih15

```

```

o      8 os16      5 osc16      6 dih16
o      16 oo17     8 oos17     5 dih17
}

```

```

nc2=      1.389237 ANG
cn3=      1.370827 ANG
cnc3=     124.437000 DEGREE
nc4=      1.369467 ANG
ncn4=     114.189000 DEGREE
dih4=     359.583000 DEGREE
cn5=      1.403419 ANG
cnc5=     124.924000 DEGREE
dih5=     0.439000 DEGREE
cc6=      1.376884 ANG
ccn6=     119.453000 DEGREE
dih6=     359.657000 DEGREE
oc7=      1.202657 ANG
ocn7=     122.822000 DEGREE
dih7=     179.600000 DEGREE
sc8=      1.766416 ANG
scn8=     115.290000 DEGREE
dih8=     177.691000 DEGREE
cc9=      1.509355 ANG
ccc9=     123.861000 DEGREE
dih9=     178.285000 DEGREE
hc10=     1.080934 ANG
hcc10=    111.652000 DEGREE
dih10=    37.245000 DEGREE
hc11=     1.085441 ANG
hcc11=    111.093000 DEGREE
dih11=    276.808000 DEGREE
hc12=     1.083936 ANG
hcc12=    110.116000 DEGREE
dih12=    157.445000 DEGREE
hn13=     0.993278 ANG
hnc13=    115.635000 DEGREE
dih13=    178.824000 DEGREE
hn14=     0.993131 ANG
hnc14=    115.019000 DEGREE
dih14=    179.921000 DEGREE
hc15=     1.068959 ANG
hcn15=    116.837000 DEGREE
dih15=    179.087000 DEGREE
os16=     3.800000 ANG
osc16=    90.000000 DEGREE
dih16=    90.000000 DEGREE
oo17=     1.210000 ANG
oos17=    87.500000 DEGREE
dih17=    0.000000 DEGREE

```

dtThy T1\_ring to56

```

geometry={
c
n      1 nc2
c      2 cn3      1 cnc3
n      3 nc4      2 ncn4      1 dih4
c      4 cn5      3 cnc5      2 dih5
c      5 cc6      4 ccn6      3 dih6
s      3 sc7      2 scn7      1 dih7
s      5 sc8      4 scn8      3 dih8
c      6 cc9      5 ccc9      4 dih9
h      9 hc10     6 hcc10     5 dih10
h      9 hc11     6 hcc11     5 dih11
h      9 hc12     6 hcc12     5 dih12
h      4 hn13     3 hnc13     2 dih13
h      2 hn14     3 hnc14     4 dih14
h      1 hc15     2 hcn15     3 dih15
o      6 oc16     5 occ16     4 dih16
o      16 oo17     6 ooc17     1 dih17
}

```

```

nc2=      1.390965 ANG
cn3=      1.347412 ANG
cnc3=     124.705000 DEGREE
nc4=      1.345660 ANG
ncn4=     114.863000 DEGREE
dih4=     0.144000 DEGREE
cn5=      1.407899 ANG
cnc5=     125.122000 DEGREE
dih5=     0.156000 DEGREE
cc6=      1.376121 ANG
ccn6=     118.897000 DEGREE
dih6=     359.691000 DEGREE
sc7=      1.675227 ANG
scn7=     122.437000 DEGREE
dih7=     180.167000 DEGREE
sc8=      1.763966 ANG
scn8=     115.086000 DEGREE
dih8=     181.447000 DEGREE
cc9=      1.508233 ANG
ccc9=     124.012000 DEGREE
dih9=     182.013000 DEGREE
hc10=     1.085541 ANG
hcc10=    110.659000 DEGREE
dih10=    89.280000 DEGREE
hc11=     1.080268 ANG
hcc11=    111.674000 DEGREE
dih11=    328.936000 DEGREE
hc12=     1.083855 ANG
hcc12=    110.126000 DEGREE
dih12=    208.472000 DEGREE
hn13=     0.994691 ANG
hnc13=    116.052000 DEGREE
dih13=    180.488000 DEGREE
hn14=     0.994384 ANG
hnc14=    115.293000 DEGREE
dih14=    180.029000 DEGREE
hc15=     1.068495 ANG
hcn15=    116.792000 DEGREE
dih15=    180.420000 DEGREE
oc16=     3.800000 ANG
occ16=    90.000000 DEGREE
dih16=    90.000000 DEGREE
oo17=     1.210000 ANG
ooc17=    90.000000 DEGREE
dih17=    0.000000 DEGREE

```

dtThy T1\_ring to2X

```

geometry={
  c
  n      1 nc2
  c      2 cn3          1 cnc3
  n      3 nc4          2 ncn4          1 dih4
  c      4 cn5          3 cnc5          2 dih5
  c      5 cc6          4 ccn6          3 dih6
  s      3 sc7          2 scn7          1 dih7
  s      5 sc8          4 scn8          3 dih8
  c      6 cc9          5 ccc9          4 dih9
  h      9 hc10         6 hcc10         5 dih10
  h      9 hc11         6 hcc11         5 dih11
  h      9 hc12         6 hcc12         5 dih12
  h      4 hn13         3 hnc13         2 dih13
  h      2 hn14         3 hnc14         4 dih14
  h      1 hc15         2 hcn15         3 dih15
  o      7 os16         3 osc16         2 dih16
  o      16 oo17        7 oos17         3 dih17
}

```

```

nc2=      1.390965 ANG
cn3=      1.347412 ANG

```

```

cnc3=      124.705000 DEGREE
nc4=      1.345660 ANG
ncn4=     114.863000 DEGREE
dih4=      0.144000 DEGREE
cn5=      1.407899 ANG
cnc5=     125.122000 DEGREE
dih5=      0.156000 DEGREE
cc6=      1.376121 ANG
ccn6=     118.897000 DEGREE
dih6=     359.691000 DEGREE
sc7=      1.675227 ANG
scn7=     122.437000 DEGREE
dih7=     180.167000 DEGREE
sc8=      1.763966 ANG
scn8=     115.086000 DEGREE
dih8=     181.447000 DEGREE
cc9=      1.508233 ANG
ccc9=     124.012000 DEGREE
dih9=     182.013000 DEGREE
hc10=     1.085541 ANG
hcc10=    110.659000 DEGREE
dih10=    89.280000 DEGREE
hc11=     1.080268 ANG
hcc11=    111.674000 DEGREE
dih11=    328.936000 DEGREE
hc12=     1.083855 ANG
hcc12=    110.126000 DEGREE
dih12=    208.472000 DEGREE
hn13=     0.994691 ANG
hnc13=    116.052000 DEGREE
dih13=    180.488000 DEGREE
hn14=     0.994384 ANG
hnc14=    115.293000 DEGREE
dih14=    180.029000 DEGREE
hc15=     1.068495 ANG
hcn15=    116.792000 DEGREE
dih15=    180.420000 DEGREE
os16=     3.800000 ANG
osc16=    90.000000 DEGREE
dih16=    90.000000 DEGREE
oo17=     1.210000 ANG
oos17=    90.000000 DEGREE
dih17=    0.000000 DEGREE

```

dtThy T1\_ring to4X

```

geometry={
  c
  n      1 nc2
  c      2 cn3          1 cnc3
  n      3 nc4          2 ncn4          1 dih4
  c      4 cn5          3 cnc5          2 dih5
  c      5 cc6          4 ccn6          3 dih6
  s      3 sc7          2 scn7          1 dih7
  s      5 sc8          4 scn8          3 dih8
  c      6 cc9          5 ccc9          4 dih9
  h      9 hc10         6 hcc10         5 dih10
  h      9 hc11         6 hcc11         5 dih11
  h      9 hc12         6 hcc12         5 dih12
  h      4 hn13         3 hnc13         2 dih13
  h      2 hn14         3 hnc14         4 dih14
  h      1 hc15         2 hcn15         3 dih15
  o      8 os16         5 osc16         6 dih16
  o      16 oo17        8 oos17         5 dih17
}

```

```

nc2=      1.390965 ANG
cn3=      1.347412 ANG
cnc3=     124.705000 DEGREE
nc4=      1.345660 ANG
ncn4=     114.863000 DEGREE

```



dih4= 0.144000 DEGREE  
 cn5= 1.407899 ANG  
 cnc5= 125.122000 DEGREE  
 dih5= 0.156000 DEGREE  
 cc6= 1.376121 ANG  
 ccn6= 118.897000 DEGREE  
 dih6= 359.691000 DEGREE  
 sc7= 1.675227 ANG  
 scn7= 122.437000 DEGREE  
 dih7= 180.167000 DEGREE  
 sc8= 1.763966 ANG  
 scn8= 115.086000 DEGREE  
 dih8= 181.447000 DEGREE  
 cc9= 1.508233 ANG  
 ccc9= 124.012000 DEGREE  
 dih9= 182.013000 DEGREE  
 hc10= 1.085541 ANG  
 hcc10= 110.659000 DEGREE  
 dih10= 89.280000 DEGREE  
 hc11= 1.080268 ANG  
 hcc11= 111.674000 DEGREE  
 dih11= 328.936000 DEGREE  
 hc12= 1.083855 ANG  
 hcc12= 110.126000 DEGREE  
 dih12= 208.472000 DEGREE  
 hn13= 0.994691 ANG  
 hnc13= 116.052000 DEGREE  
 dih13= 180.488000 DEGREE  
 hn14= 0.994384 ANG  
 hnc14= 115.293000 DEGREE  
 dih14= 180.029000 DEGREE  
 hc15= 1.068495 ANG  
 hcn15= 116.792000 DEGREE  
 dih15= 180.420000 DEGREE  
 os16= 3.800000 ANG  
 osc16= 90.000000 DEGREE  
 dih16= 90.000000 DEGREE  
 oo17= 1.210000 ANG  
 oos17= 87.500000 DEGREE  
 dih17= 0.000000 DEGREE

Given below is a full run through of obtaining the rate for one case

Case chosen: 4tThy, along to56, D=3.0 Angstrom

1. Optimized geometry for PS-02 on TT0 (reactant) state  
in Cartesian coordinates

17  
 CASSCF/6-31G\*\* ENERGY=-923.72420547

|   |               |               |               |
|---|---------------|---------------|---------------|
| C | 1.3872302805  | -0.8294821734 | 0.6748727766  |
| N | 0.9062516942  | -0.1951180436 | 1.8230689956  |
| C | -0.0251373739 | 0.8021788148  | 1.8269819800  |
| N | -0.4127396630 | 1.2208199696  | 0.5890503818  |
| C | 0.1029658625  | 0.7309129346  | -0.6348016930 |
| C | 1.0066686962  | -0.2909340488 | -0.6172047079 |
| O | -0.4648919027 | 1.2745989341  | 2.8386043311  |
| S | -0.5213910560 | 1.4992066562  | -2.0750198925 |
| C | 1.6422520836  | -0.9217075855 | -1.8266103672 |
| H | 1.2667050271  | -0.5093278942 | -2.7503728350 |
| H | 1.4555405626  | -1.9910797662 | -1.8275966000 |
| H | 2.7185590224  | -0.7784166750 | -1.8003958069 |
| H | -1.0651035572 | 1.9690630091  | 0.5814004927  |
| H | 1.1515723642  | -0.5338965590 | 2.7238464211  |
| H | 2.2568216480  | -1.4419773770 | 0.7955338859  |
| O | -1.4093139067 | -2.0691781715 | -0.6468003560 |
| O | -1.0918795973 | -2.5183923306 | 0.4309482689  |

2. Optimized geometry for PS-02 on SS2 (product) state  
in Cartesian coordinates

17

MULTI001/6-31G\*\* ENERGY=-923.76385757

|   |               |               |               |
|---|---------------|---------------|---------------|
| C | 1.3521039098  | -0.7578756321 | 0.5902462579  |
| N | 0.8686741377  | -0.2470698355 | 1.7847703146  |
| C | -0.0213969470 | 0.7795637294  | 1.8467485255  |
| N | -0.3930408385 | 1.2687597287  | 0.6179958588  |
| C | 0.0273271563  | 0.8457232126  | -0.6275318571 |
| C | 0.9760948527  | -0.2733640308 | -0.6099484131 |
| O | -0.4497366372 | 1.2252071297  | 2.8705107399  |
| S | -0.5299594195 | 1.5757270491  | -1.9863636761 |
| C | 1.5221611727  | -0.8333114839 | -1.8954460958 |
| H | 2.0591871794  | -0.0750255209 | -2.4528469634 |
| H | 0.7251903045  | -1.1996474061 | -2.5309612386 |
| H | 2.2014293002  | -1.6525206981 | -1.6884664137 |
| H | -1.0416016098 | 2.0243023801  | 0.6542125611  |
| H | 1.1509777695  | -0.6275864586 | 2.6577458314  |
| H | 2.0440979714  | -1.5707503706 | 0.6895871999  |
| O | -1.2935078292 | -2.2335828927 | -0.6902334016 |
| O | -0.9559456079 | -2.6685532991 | 0.3872416526  |

## 3. Normal modes for PS-02 on TT0 (reactant) state

## Normal Modes

|                        | 1 A      | 2 A      | 3 A      | 4 A      | 5 A      |
|------------------------|----------|----------|----------|----------|----------|
| Wavenumbers [cm-1]     | 101.98   | 107.89   | 123.77   | 192.00   | 219.17   |
| Intensities [km/mol]   | 0.86     | 0.54     | 0.19     | 12.69    | 0.06     |
| Intensities [relative] | 0.08     | 0.05     | 0.02     | 1.12     | 0.01     |
| CX1                    | 0.05413  | -0.01904 | 0.06365  | 0.11755  | -0.00266 |
| CY1                    | 0.04558  | -0.02007 | 0.05949  | 0.10715  | -0.00678 |
| CZ1                    | 0.00191  | 0.00034  | 0.00725  | -0.01433 | -0.00738 |
| NX2                    | -0.01174 | -0.00825 | 0.12394  | -0.07514 | 0.00292  |
| NY2                    | -0.01154 | -0.00649 | 0.11486  | -0.07290 | -0.00865 |
| NZ2                    | 0.00546  | -0.00178 | 0.00298  | -0.00043 | -0.00381 |
| CX3                    | 0.01899  | 0.00116  | 0.00310  | -0.01644 | 0.00524  |
| CY3                    | 0.01718  | 0.00112  | 0.00447  | -0.02116 | -0.00673 |
| CZ3                    | 0.00365  | -0.00186 | 0.00256  | -0.00327 | 0.00334  |
| NX4                    | 0.10313  | -0.06145 | -0.04074 | -0.06722 | 0.00524  |
| NY4                    | 0.09499  | -0.05693 | -0.04072 | -0.07773 | 0.00286  |
| NZ4                    | 0.00495  | -0.00281 | 0.00147  | -0.00775 | 0.00643  |
| CX5                    | 0.04911  | -0.00785 | -0.01165 | -0.01416 | -0.00116 |
| CY5                    | 0.04360  | -0.00652 | -0.01396 | -0.02959 | 0.00547  |
| CZ5                    | 0.00317  | -0.00049 | 0.00169  | -0.01183 | 0.00286  |
| CX6                    | 0.04562  | 0.01610  | 0.00775  | 0.05968  | -0.00670 |
| CY6                    | 0.04059  | 0.01635  | 0.00096  | 0.02344  | 0.00093  |
| CZ6                    | 0.00407  | -0.00140 | 0.00409  | -0.00290 | -0.00457 |
| OX7                    | -0.02245 | 0.05262  | -0.05057 | 0.05533  | 0.00742  |
| OY7                    | -0.02141 | 0.05042  | -0.04418 | 0.05391  | -0.01220 |
| OZ7                    | 0.00380  | -0.00263 | 0.00215  | -0.00597 | 0.00689  |
| SX8                    | -0.03574 | -0.00319 | 0.03443  | -0.00731 | -0.00701 |
| SY8                    | -0.03509 | 0.00002  | 0.03425  | 0.03646  | 0.00384  |
| SZ8                    | -0.00300 | 0.00228  | 0.00373  | 0.00607  | 0.00534  |
| CX9                    | 0.04396  | 0.04004  | -0.04863 | 0.04260  | -0.01627 |
| CY9                    | 0.04141  | 0.03636  | -0.05521 | -0.03641 | 0.00643  |
| CZ9                    | 0.00255  | 0.00156  | 0.00340  | 0.01090  | -0.01171 |
| HX10                   | 0.10114  | 0.40039  | -0.02424 | -0.05667 | -0.01497 |
| HY10                   | 0.09762  | 0.37923  | -0.03121 | -0.15515 | 0.01884  |
| HZ10                   | 0.00450  | 0.00827  | 0.00411  | -0.00353 | -0.00649 |
| HX11                   | -0.01794 | -0.36191 | -0.14155 | 0.12773  | -0.02634 |
| HY11                   | 0.05209  | 0.10543  | -0.03896 | -0.05000 | 0.00832  |
| HZ11                   | -0.04376 | -0.27572 | 0.01314  | 0.12827  | -0.02234 |
| HX12                   | 0.05141  | 0.08724  | -0.03676 | 0.03181  | -0.01486 |
| HY12                   | -0.02189 | -0.37561 | -0.14816 | 0.05533  | -0.00370 |
| HZ12                   | 0.04592  | 0.27536  | -0.00959 | -0.08099 | -0.01337 |
| HX13                   | 0.06976  | -0.01260 | -0.12064 | 0.05079  | 0.00543  |
| HY13                   | 0.06572  | -0.01394 | -0.11075 | 0.02488  | 0.00305  |
| HZ13                   | 0.00499  | -0.00123 | -0.00297 | -0.00790 | 0.01207  |
| HX14                   | -0.05560 | 0.03549  | 0.13638  | -0.01440 | 0.01016  |
| HY14                   | -0.04904 | 0.03214  | 0.12484  | -0.03819 | -0.00720 |
| HZ14                   | 0.00314  | 0.00072  | 0.00381  | -0.00461 | -0.00532 |
| HX15                   | 0.06436  | -0.00303 | 0.06584  | 0.06844  | 0.00149  |

|      |          |          |          |          |          |
|------|----------|----------|----------|----------|----------|
| HY15 | 0.06200  | 0.00221  | 0.06067  | 0.04979  | -0.00234 |
| HZ15 | 0.00918  | 0.00233  | -0.00375 | 0.01748  | -0.01322 |
| OX16 | -0.06339 | -0.00704 | -0.04263 | -0.02218 | 0.11542  |
| OY16 | -0.05945 | -0.01118 | -0.04173 | -0.00958 | -0.10940 |
| OZ16 | -0.01110 | 0.00113  | -0.01633 | 0.00398  | -0.08056 |
| OX17 | -0.09500 | -0.01015 | -0.05167 | -0.04900 | -0.09731 |
| OY17 | -0.07628 | -0.01236 | -0.03540 | -0.01098 | 0.11841  |
| OZ17 | -0.00882 | 0.00173  | -0.01172 | 0.01001  | 0.07686  |

|                        | 6 A      | 7 A      | 8 A      | 9 A      | 10 A     |
|------------------------|----------|----------|----------|----------|----------|
| Wavenumbers [cm-1]     | 247.82   | 266.01   | 295.15   | 332.39   | 341.31   |
| Intensities [km/mol]   | 4.25     | 18.56    | 38.29    | 4.14     | 41.04    |
| Intensities [relative] | 0.37     | 1.64     | 3.38     | 0.37     | 3.62     |
| CX1                    | 0.00444  | 0.03971  | 0.01707  | -0.00781 | -0.06822 |
| CY1                    | -0.00778 | 0.02140  | -0.07652 | -0.01815 | -0.07008 |
| CZ1                    | 0.00303  | 0.00473  | 0.03509  | 0.01022  | -0.00093 |
| NX2                    | -0.00032 | -0.03323 | -0.01669 | 0.00011  | 0.01433  |
| NY2                    | 0.00365  | -0.02655 | -0.00736 | 0.01248  | 0.00375  |
| NZ2                    | -0.00357 | 0.00056  | -0.00131 | 0.01127  | -0.01402 |
| CX3                    | -0.00284 | -0.01237 | -0.00735 | -0.01948 | -0.00537 |
| CY3                    | 0.00147  | -0.00765 | 0.00336  | 0.00080  | -0.01875 |
| CZ3                    | -0.00005 | 0.02328  | -0.03296 | -0.00552 | -0.00065 |
| NX4                    | -0.01625 | -0.03762 | 0.03832  | -0.03490 | -0.05652 |
| NY4                    | -0.00192 | 0.01581  | 0.00002  | -0.05774 | -0.02606 |
| NZ4                    | 0.00229  | 0.03078  | -0.03405 | -0.01129 | 0.00301  |
| CX5                    | -0.00732 | -0.04679 | 0.01556  | 0.11114  | 0.08816  |
| CY5                    | 0.00590  | 0.00963  | -0.04036 | 0.04775  | 0.12217  |
| CZ5                    | 0.00554  | 0.02942  | -0.00339 | 0.02212  | -0.00557 |
| CX6                    | -0.00808 | -0.02644 | 0.00043  | 0.09825  | 0.04135  |
| CY6                    | 0.01179  | 0.04479  | -0.03462 | 0.03885  | 0.08774  |
| CZ6                    | -0.00234 | 0.00575  | -0.01164 | 0.00446  | -0.00079 |
| OX7                    | 0.00810  | 0.03287  | -0.03988 | -0.03858 | 0.03207  |
| OY7                    | 0.00386  | -0.01487 | 0.04251  | 0.04702  | -0.03560 |
| OZ7                    | 0.00320  | 0.04560  | -0.06625 | -0.03607 | 0.02337  |
| SX8                    | 0.00681  | 0.07311  | -0.01233 | 0.00898  | -0.02850 |
| SY8                    | -0.02180 | -0.05870 | 0.02139  | -0.03469 | 0.00734  |
| SZ8                    | -0.00498 | -0.03937 | 0.06988  | 0.04717  | -0.03640 |
| CX9                    | -0.04271 | -0.08580 | -0.01010 | -0.06397 | 0.00643  |
| CY9                    | 0.00895  | 0.06992  | -0.01154 | 0.03523  | -0.05751 |
| CZ9                    | -0.01661 | -0.03516 | -0.02341 | -0.08583 | 0.06631  |
| HX10                   | -0.06150 | -0.11829 | -0.01261 | -0.20664 | 0.00331  |
| HY10                   | 0.01140  | 0.09199  | 0.01727  | 0.05456  | -0.18279 |
| HZ10                   | -0.00700 | -0.00908 | -0.00984 | -0.01797 | 0.01086  |
| HX11                   | -0.05418 | -0.09834 | -0.01664 | -0.09592 | -0.02759 |
| HY11                   | 0.01070  | 0.07151  | -0.01078 | 0.04065  | -0.05140 |
| HZ11                   | -0.00961 | -0.04638 | -0.04655 | -0.07309 | 0.23361  |
| HX12                   | -0.03985 | -0.08140 | -0.00720 | -0.05620 | 0.01256  |
| HY12                   | -0.00375 | 0.05399  | -0.02251 | 0.00802  | -0.09481 |
| HZ12                   | -0.04396 | -0.07798 | -0.02556 | -0.26497 | 0.02884  |
| HX13                   | -0.00189 | 0.00923  | 0.01498  | 0.11680  | 0.08249  |
| HY13                   | 0.01103  | 0.05822  | -0.02137 | 0.07466  | 0.09576  |
| HZ13                   | 0.00452  | 0.04511  | -0.05784 | -0.02902 | 0.02366  |
| HX14                   | 0.01734  | -0.02055 | 0.00398  | -0.03707 | 0.01156  |
| HY14                   | 0.02431  | -0.01836 | 0.05513  | -0.01480 | 0.00899  |
| HZ14                   | -0.00043 | 0.00042  | 0.01754  | 0.01123  | -0.01038 |
| HX15                   | 0.10062  | 0.25154  | 0.45665  | -0.17708 | 0.18086  |
| HY15                   | 0.12258  | 0.30948  | 0.52377  | -0.24322 | 0.26037  |
| HZ15                   | -0.00942 | -0.02750 | 0.01219  | 0.06242  | -0.04166 |
| OX16                   | 0.14193  | -0.04244 | -0.00843 | -0.01273 | -0.00719 |
| OY16                   | 0.11839  | -0.02467 | -0.00642 | -0.01109 | -0.01075 |
| OZ16                   | 0.02032  | -0.00510 | -0.00514 | 0.00092  | 0.00004  |
| OX17                   | -0.10424 | 0.02760  | 0.01470  | 0.00383  | 0.00577  |
| OY17                   | -0.10645 | 0.02717  | 0.01323  | -0.00019 | 0.00119  |
| OZ17                   | -0.00045 | -0.00281 | -0.00351 | 0.00122  | -0.00010 |

|                        | 11 A     | 12 A    | 13 A     | 14 A    | 15 A    |
|------------------------|----------|---------|----------|---------|---------|
| Wavenumbers [cm-1]     | 454.29   | 480.44  | 512.49   | 553.50  | 573.88  |
| Intensities [km/mol]   | 2.36     | 39.94   | 31.36    | 65.92   | 27.48   |
| Intensities [relative] | 0.21     | 3.52    | 2.77     | 5.81    | 2.42    |
| CX1                    | -0.01576 | 0.03219 | -0.02759 | 0.00803 | 0.06087 |
| CY1                    | 0.02334  | 0.02473 | 0.01147  | 0.05081 | 0.02388 |

|      |          |          |          |          |          |
|------|----------|----------|----------|----------|----------|
| CZ1  | -0.06949 | -0.00704 | 0.00043  | -0.04690 | 0.03079  |
| NX2  | -0.05170 | 0.03549  | -0.02750 | 0.01118  | -0.01788 |
| NY2  | 0.03695  | 0.03453  | 0.04313  | -0.05928 | 0.00831  |
| NZ2  | -0.10811 | -0.02169 | 0.02136  | 0.02761  | -0.01186 |
| CX3  | -0.04254 | -0.00534 | -0.03601 | 0.01850  | -0.00431 |
| CY3  | 0.04147  | -0.00156 | 0.03359  | -0.04826 | 0.01951  |
| CZ3  | -0.02833 | -0.02606 | 0.08896  | 0.03700  | -0.03661 |
| NX4  | -0.04414 | -0.04404 | 0.00451  | 0.02278  | -0.04352 |
| NY4  | 0.06270  | -0.00735 | -0.02213 | -0.04419 | -0.00548 |
| NZ4  | -0.00809 | -0.01272 | 0.03318  | 0.03624  | -0.02741 |
| CX5  | 0.00060  | -0.00104 | 0.05785  | 0.04005  | 0.12667  |
| CY5  | 0.01771  | 0.00242  | -0.01644 | 0.10104  | 0.08520  |
| CZ5  | 0.02613  | 0.00682  | -0.00539 | 0.00342  | 0.00709  |
| CX6  | -0.00420 | -0.06469 | 0.00591  | -0.11543 | -0.08281 |
| CY6  | 0.00944  | -0.05737 | -0.07924 | -0.01480 | -0.11575 |
| CZ6  | -0.04924 | 0.01206  | -0.06183 | -0.04909 | 0.04084  |
| OX7  | 0.02697  | -0.00494 | -0.02339 | -0.05527 | 0.04550  |
| OY7  | -0.03029 | -0.02848 | 0.01861  | 0.05459  | -0.02290 |
| OZ7  | 0.03551  | -0.01614 | 0.11540  | -0.04409 | 0.00246  |
| SX8  | 0.03310  | 0.00115  | -0.01245 | 0.01311  | -0.00953 |
| SY8  | -0.04310 | -0.00401 | 0.01279  | -0.02095 | 0.00282  |
| SZ8  | 0.08633  | 0.01780  | -0.03438 | 0.00909  | -0.00464 |
| CX9  | 0.04211  | 0.00005  | 0.05706  | -0.00046 | -0.01994 |
| CY9  | -0.04615 | 0.00363  | -0.04900 | -0.00209 | 0.01676  |
| CZ9  | -0.00999 | 0.02736  | -0.11751 | 0.00608  | 0.01426  |
| HX10 | 0.09996  | 0.05607  | 0.04912  | 0.09426  | -0.02144 |
| HY10 | -0.11024 | 0.04088  | -0.00008 | -0.03717 | 0.10436  |
| HZ10 | -0.06252 | 0.02207  | -0.09467 | -0.04855 | 0.05431  |
| HX11 | 0.03966  | 0.04182  | 0.08978  | 0.05894  | 0.06257  |
| HY11 | -0.04585 | -0.00337 | -0.05355 | -0.01276 | 0.00396  |
| HZ11 | 0.06462  | -0.04622 | -0.19015 | 0.01577  | -0.12663 |
| HX12 | 0.04128  | -0.00768 | 0.05127  | -0.00931 | -0.03262 |
| HY12 | -0.05088 | 0.04359  | -0.01090 | 0.05185  | 0.10253  |
| HZ12 | 0.05436  | 0.11590  | -0.10880 | 0.14329  | 0.05723  |
| HX13 | -0.12186 | 0.60756  | 0.11290  | 0.05260  | -0.30017 |
| HY13 | -0.00503 | 0.56168  | 0.07221  | -0.01650 | -0.23048 |
| HZ13 | -0.06767 | 0.00375  | -0.03482 | 0.10788  | -0.05939 |
| HX14 | 0.08874  | -0.18873 | 0.03456  | 0.42953  | -0.23847 |
| HY14 | 0.15042  | -0.13434 | 0.02736  | 0.19236  | -0.11265 |
| HZ14 | -0.10495 | -0.02347 | -0.00078 | 0.00719  | 0.00315  |
| HX15 | -0.04870 | 0.01109  | 0.06491  | -0.01581 | 0.04004  |
| HY15 | -0.01194 | -0.00504 | 0.14813  | 0.00857  | 0.00122  |
| HZ15 | -0.02858 | -0.01551 | 0.05762  | -0.12546 | 0.04848  |
| OX16 | -0.00086 | 0.00437  | 0.00088  | -0.00287 | -0.00145 |
| OY16 | -0.00114 | 0.00169  | 0.00095  | 0.00108  | 0.00026  |
| OZ16 | -0.00011 | -0.00077 | 0.00111  | -0.00005 | 0.00080  |
| OX17 | 0.00008  | 0.00212  | -0.00073 | 0.00071  | -0.00075 |
| OY17 | 0.00079  | 0.00044  | -0.00033 | 0.00008  | 0.00056  |
| OZ17 | 0.00075  | -0.00205 | -0.00037 | 0.00088  | -0.00047 |

|                        | 16 A     | 17 A     | 18 A     | 19 A     | 20 A     |
|------------------------|----------|----------|----------|----------|----------|
| Wavenumbers [cm-1]     | 581.90   | 721.11   | 824.33   | 847.34   | 938.11   |
| Intensities [km/mol]   | 97.75    | 1.25     | 3.68     | 86.38    | 18.57    |
| Intensities [relative] | 8.62     | 0.11     | 0.32     | 7.62     | 1.64     |
| CX1                    | 0.02925  | 0.09455  | -0.02319 | -0.00202 | 0.11303  |
| CY1                    | -0.02573 | -0.10932 | 0.01787  | -0.00782 | -0.10059 |
| CZ1                    | 0.07414  | -0.04851 | -0.08132 | -0.00756 | 0.01823  |
| NX2                    | -0.05124 | 0.03043  | -0.01666 | -0.05096 | 0.02993  |
| NY2                    | -0.00387 | -0.03134 | 0.02280  | -0.04168 | -0.02821 |
| NZ2                    | 0.00585  | -0.07872 | -0.09757 | -0.01017 | 0.02489  |
| CX3                    | -0.03075 | -0.01269 | -0.03758 | 0.18460  | -0.04319 |
| CY3                    | -0.01122 | 0.00930  | 0.00005  | 0.17322  | 0.03964  |
| CZ3                    | -0.03977 | 0.01757  | 0.03865  | 0.00602  | 0.03536  |
| NX4                    | -0.01009 | -0.05932 | 0.07249  | -0.03930 | -0.00651 |
| NY4                    | 0.03088  | 0.06717  | -0.06874 | -0.04907 | 0.00578  |
| NZ4                    | -0.04048 | 0.07138  | -0.01557 | -0.00352 | -0.06787 |
| CX5                    | 0.02245  | -0.00008 | 0.06272  | 0.00171  | -0.01285 |
| CY5                    | -0.01768 | -0.00564 | -0.06974 | -0.01036 | 0.02116  |
| CZ5                    | -0.01587 | 0.11063  | -0.01452 | -0.00150 | -0.10971 |
| CX6                    | 0.01485  | 0.02866  | 0.02650  | 0.00242  | -0.02717 |
| CY6                    | -0.02871 | -0.03511 | -0.02521 | 0.00017  | 0.02924  |

|      |          |          |          |          |          |
|------|----------|----------|----------|----------|----------|
| CZ6  | 0.04524  | 0.04910  | 0.02736  | 0.00141  | -0.06435 |
| OX7  | 0.03977  | -0.05112 | -0.01765 | -0.06051 | -0.02433 |
| OY7  | -0.05999 | 0.05614  | 0.03068  | -0.04967 | 0.02869  |
| OZ7  | 0.00888  | -0.01304 | 0.05410  | 0.00664  | 0.08265  |
| SX8  | -0.01328 | -0.01234 | -0.00294 | 0.00003  | 0.00227  |
| SY8  | 0.01620  | 0.01567  | 0.00388  | 0.00057  | -0.00345 |
| SZ8  | -0.01743 | -0.03767 | -0.00790 | -0.00091 | 0.01572  |
| CX9  | -0.01537 | 0.01575  | -0.05610 | -0.00498 | -0.03502 |
| CY9  | 0.02397  | -0.01111 | 0.06009  | 0.00845  | 0.03394  |
| CZ9  | 0.00178  | -0.00001 | 0.11305  | 0.01089  | 0.01043  |
| HX10 | -0.06561 | 0.00417  | -0.10916 | -0.01493 | 0.09453  |
| HY10 | 0.08117  | 0.00372  | 0.11900  | 0.00573  | -0.10729 |
| HZ10 | 0.04664  | 0.01097  | 0.16378  | 0.01384  | -0.10348 |
| HX11 | 0.00335  | 0.02685  | -0.04934 | -0.01380 | -0.02486 |
| HY11 | 0.02008  | -0.01242 | 0.06118  | 0.01008  | 0.02905  |
| HZ11 | -0.05739 | -0.02496 | 0.06156  | 0.02100  | 0.17581  |
| HX12 | -0.01527 | 0.01458  | -0.05834 | -0.00346 | -0.03218 |
| HY12 | 0.04723  | 0.00043  | 0.08018  | 0.00026  | -0.00189 |
| HZ12 | -0.03980 | -0.01698 | 0.06691  | -0.00175 | 0.16607  |
| HX13 | 0.11823  | -0.06801 | 0.07954  | 0.02862  | -0.00624 |
| HY13 | 0.14485  | 0.06107  | -0.06744 | 0.01027  | 0.00840  |
| HZ13 | -0.05823 | 0.08596  | -0.11823 | -0.01944 | -0.16369 |
| HX14 | 0.48951  | 0.08947  | 0.11470  | 0.05412  | -0.04549 |
| HY14 | 0.55516  | 0.00227  | -0.01878 | 0.04523  | -0.02875 |
| HZ14 | 0.06597  | -0.08125 | -0.15218 | -0.00720 | 0.05025  |
| HX15 | -0.03210 | 0.07324  | 0.00612  | 0.01106  | 0.03863  |
| HY15 | -0.09735 | -0.13851 | 0.06371  | 0.00977  | -0.21970 |
| HZ15 | 0.11552  | -0.02327 | -0.07726 | -0.00880 | -0.00677 |
| OX16 | -0.00601 | -0.00093 | -0.00179 | -0.00068 | 0.00017  |
| OY16 | 0.00116  | 0.00019  | 0.00027  | -0.00002 | -0.00008 |
| OZ16 | -0.00041 | 0.00087  | 0.00022  | -0.00003 | -0.00091 |
| OX17 | -0.00017 | -0.00150 | -0.00177 | -0.00017 | 0.00149  |
| OY17 | -0.00003 | 0.00017  | -0.00079 | 0.00002  | 0.00055  |
| OZ17 | 0.00300  | 0.00052  | 0.00158  | 0.00037  | -0.00044 |

|                        | 21 A     | 22 A     | 23 A     | 24 A     | 25 A     |
|------------------------|----------|----------|----------|----------|----------|
| Wavenumbers [cm-1]     | 1033.16  | 1126.97  | 1133.52  | 1243.14  | 1280.92  |
| Intensities [km/mol]   | 17.66    | 1.16     | 0.55     | 41.55    | 110.61   |
| Intensities [relative] | 1.56     | 0.10     | 0.05     | 3.66     | 9.75     |
| CX1                    | 0.04203  | -0.02877 | -0.01081 | -0.04784 | -0.01067 |
| CY1                    | -0.02714 | 0.03130  | 0.00066  | 0.05014  | 0.01118  |
| CZ1                    | 0.05471  | -0.05403 | -0.00952 | 0.06897  | 0.02913  |
| NX2                    | -0.06786 | 0.01828  | 0.00413  | 0.03924  | 0.01694  |
| NY2                    | 0.07434  | -0.02167 | -0.00568 | -0.04296 | -0.01952 |
| NZ2                    | -0.05565 | 0.08765  | 0.01555  | -0.05237 | -0.05137 |
| CX3                    | 0.01044  | -0.01523 | 0.00137  | 0.02747  | -0.01114 |
| CY3                    | -0.01298 | 0.01436  | 0.00494  | -0.02577 | 0.01156  |
| CZ3                    | -0.02134 | -0.01560 | -0.00279 | 0.03231  | 0.00728  |
| NX4                    | 0.06744  | -0.02789 | -0.00835 | -0.05328 | 0.04709  |
| NY4                    | -0.07430 | 0.03353  | 0.00351  | 0.05640  | -0.04831 |
| NZ4                    | 0.06706  | -0.04337 | -0.00806 | 0.00854  | -0.07827 |
| CX5                    | 0.00230  | 0.07793  | 0.00800  | 0.02947  | -0.04520 |
| CY5                    | -0.00479 | -0.09214 | -0.01621 | -0.02821 | 0.04728  |
| CZ5                    | 0.06318  | 0.11749  | 0.01724  | -0.06997 | 0.04069  |
| CX6                    | -0.02291 | -0.00027 | 0.06814  | 0.03743  | -0.04543 |
| CY6                    | 0.02104  | -0.01899 | 0.05871  | -0.04793 | 0.04166  |
| CZ6                    | -0.04593 | -0.01599 | -0.00022 | 0.00392  | 0.17567  |
| OX7                    | 0.01168  | 0.01385  | 0.00156  | -0.00918 | -0.00807 |
| OY7                    | -0.01163 | -0.01437 | -0.00307 | 0.00917  | 0.00848  |
| OZ7                    | -0.02665 | -0.00952 | -0.00191 | -0.01111 | 0.02810  |
| SX8                    | -0.00508 | -0.00693 | -0.00018 | -0.00014 | -0.00050 |
| SY8                    | 0.00679  | 0.00830  | 0.00139  | 0.00003  | 0.00054  |
| SZ8                    | -0.01689 | -0.01228 | -0.00115 | 0.00482  | -0.00091 |
| CX9                    | -0.03585 | -0.02586 | -0.09911 | -0.03384 | 0.01562  |
| CY9                    | 0.03710  | 0.06007  | -0.07499 | 0.04242  | -0.01123 |
| CZ9                    | -0.03373 | -0.02711 | -0.01044 | -0.02413 | -0.07986 |
| HX10                   | 0.17534  | 0.12778  | 0.23566  | 0.09120  | 0.14784  |
| HY10                   | -0.18909 | -0.19896 | 0.14302  | -0.10355 | -0.15048 |
| HZ10                   | -0.21955 | -0.20354 | -0.04855 | -0.13825 | -0.20253 |
| HX11                   | -0.00623 | -0.07125 | 0.37528  | 0.00131  | 0.06882  |
| HY11                   | 0.02852  | 0.06605  | -0.14964 | 0.03558  | -0.02432 |

|      |          |          |          |          |          |
|------|----------|----------|----------|----------|----------|
| HZ11 | 0.22429  | 0.28468  | -0.31657 | 0.17689  | -0.03148 |
| HX12 | -0.03205 | -0.01318 | -0.16178 | -0.02901 | 0.02666  |
| HY12 | -0.01929 | -0.07123 | 0.37107  | -0.02449 | -0.07436 |
| HZ12 | 0.21477  | 0.14713  | 0.43020  | 0.15364  | -0.03926 |
| HX13 | 0.07265  | -0.02746 | -0.01952 | -0.06521 | 0.06002  |
| HY13 | -0.07649 | 0.03000  | -0.00752 | 0.05577  | -0.04812 |
| HZ13 | 0.12027  | -0.23688 | -0.04225 | 0.09531  | -0.22823 |
| HX14 | -0.17922 | 0.02136  | 0.00412  | 0.25767  | 0.11234  |
| HY14 | 0.13577  | 0.00290  | -0.00391 | -0.29704 | -0.11932 |
| HZ14 | -0.00634 | 0.09960  | 0.01708  | -0.21391 | -0.11936 |
| HX15 | -0.02490 | -0.00602 | -0.00113 | -0.05689 | -0.00133 |
| HY15 | -0.07763 | 0.03190  | 0.01154  | 0.11303  | 0.01373  |
| HZ15 | 0.28035  | -0.22770 | -0.01230 | 0.42501  | -0.05714 |
| OX16 | 0.00019  | 0.00047  | 0.00011  | -0.00006 | 0.00028  |
| OY16 | 0.00054  | 0.00050  | -0.00070 | -0.00006 | -0.00059 |
| OZ16 | -0.00129 | -0.00041 | 0.00104  | 0.00018  | 0.00110  |
| OX17 | 0.00132  | 0.00014  | -0.00054 | -0.00026 | -0.00069 |
| OY17 | 0.00002  | -0.00031 | 0.00010  | 0.00000  | 0.00036  |
| OZ17 | 0.00046  | 0.00082  | -0.00082 | -0.00011 | -0.00099 |

|                        | 26 A     | 27 A     | 28 A     | 29 A     | 30 A     |
|------------------------|----------|----------|----------|----------|----------|
| Wavenumbers [cm-1]     | 1339.31  | 1489.51  | 1548.64  | 1555.83  | 1599.85  |
| Intensities [km/mol]   | 152.19   | 32.01    | 45.78    | 27.13    | 34.60    |
| Intensities [relative] | 13.42    | 2.82     | 4.04     | 2.39     | 3.05     |
| CX1                    | 0.00874  | -0.00853 | 0.00481  | -0.00759 | 0.01567  |
| CY1                    | -0.00531 | 0.02089  | -0.01910 | 0.01242  | -0.00967 |
| CZ1                    | 0.00382  | 0.12562  | -0.09269 | 0.03103  | 0.04870  |
| NX2                    | 0.01173  | 0.04405  | 0.00691  | 0.00327  | -0.03187 |
| NY2                    | -0.00868 | -0.05548 | -0.00161 | -0.00533 | 0.03391  |
| NZ2                    | 0.00395  | -0.03086 | 0.06994  | -0.03775 | -0.00431 |
| CX3                    | 0.02338  | -0.09377 | -0.07557 | 0.04145  | 0.02516  |
| CY3                    | -0.02551 | 0.10282  | 0.08595  | -0.04702 | -0.02583 |
| CZ3                    | 0.03592  | -0.07605 | -0.07775 | 0.03414  | 0.00756  |
| NX4                    | 0.00541  | 0.02172  | 0.03370  | -0.00939 | -0.00693 |
| NY4                    | -0.00255 | -0.02550 | -0.03557 | 0.01056  | 0.01041  |
| NZ4                    | -0.07261 | 0.08328  | -0.02978 | -0.01018 | -0.10092 |
| CX5                    | -0.02978 | 0.02174  | -0.04413 | 0.00287  | 0.04061  |
| CY5                    | 0.02543  | -0.02663 | 0.04761  | -0.00290 | -0.04884 |
| CZ5                    | 0.12299  | 0.02047  | 0.02661  | -0.00431 | 0.04428  |
| CX6                    | -0.03188 | -0.02945 | 0.03246  | -0.00512 | -0.03515 |
| CY6                    | 0.03245  | 0.04022  | -0.04182 | 0.00676  | 0.04481  |
| CZ6                    | -0.09934 | -0.06408 | 0.02290  | 0.02114  | -0.02523 |
| OX7                    | 0.00163  | 0.01096  | 0.01240  | -0.01127 | -0.00739 |
| OY7                    | -0.00175 | -0.01240 | -0.01417 | 0.01250  | 0.00786  |
| OZ7                    | -0.00279 | -0.00970 | 0.01559  | 0.00559  | 0.02570  |
| SX8                    | -0.00243 | -0.00191 | 0.00135  | -0.00055 | -0.00181 |
| SY8                    | 0.00314  | 0.00242  | -0.00146 | 0.00057  | 0.00206  |
| SZ8                    | -0.00815 | -0.00656 | -0.00012 | -0.00020 | -0.00065 |
| CX9                    | 0.01930  | 0.01718  | 0.01416  | 0.05299  | 0.02480  |
| CY9                    | -0.02261 | -0.02174 | -0.01072 | -0.05301 | -0.02574 |
| CZ9                    | 0.04318  | 0.00149  | -0.03819 | -0.09558 | 0.02322  |
| HX10                   | -0.10630 | -0.06351 | -0.12237 | -0.26855 | 0.07792  |
| HY10                   | 0.10615  | 0.07061  | 0.12761  | 0.26628  | -0.13843 |
| HZ10                   | 0.15197  | 0.07588  | 0.08469  | 0.18595  | -0.05785 |
| HX11                   | -0.04106 | -0.06892 | -0.07583 | -0.30188 | -0.31473 |
| HY11                   | -0.00961 | -0.00451 | 0.01073  | 0.01887  | 0.03726  |
| HZ11                   | -0.09505 | -0.01491 | 0.20528  | 0.36884  | -0.16062 |
| HX12                   | 0.01069  | 0.00182  | -0.00774 | -0.01509 | -0.02310 |
| HY12                   | 0.04472  | 0.07276  | 0.07119  | 0.28870  | 0.30610  |
| HZ12                   | -0.08792 | -0.00568 | 0.19333  | 0.38420  | -0.08845 |
| HX13                   | 0.01535  | 0.03484  | 0.03074  | -0.00820 | -0.02683 |
| HY13                   | -0.00671 | -0.02293 | -0.03340 | 0.00927  | 0.00639  |
| HZ13                   | -0.41016 | -0.14365 | 0.36179  | -0.12749 | 0.51257  |
| HX14                   | 0.09479  | 0.16606  | 0.18669  | -0.13535 | 0.12548  |
| HY14                   | -0.12165 | -0.20150 | -0.17617 | 0.13431  | -0.17981 |
| HZ14                   | -0.06162 | -0.12567 | -0.04135 | 0.05229  | -0.13427 |
| HX15                   | -0.04037 | -0.00624 | 0.01010  | -0.00428 | 0.01166  |
| HY15                   | 0.01792  | -0.05011 | 0.05147  | -0.00829 | -0.06203 |
| HZ15                   | 0.49327  | -0.23442 | 0.28504  | -0.11633 | -0.16410 |
| OX16                   | 0.00048  | 0.00091  | 0.00014  | 0.00007  | 0.00125  |
| OY16                   | -0.00044 | -0.00060 | -0.00069 | 0.00019  | -0.00101 |

|      |          |          |          |          |          |
|------|----------|----------|----------|----------|----------|
| OZ16 | 0.00110  | 0.00134  | 0.00171  | -0.00056 | 0.00237  |
| OX17 | -0.00033 | 0.00003  | -0.00090 | 0.00035  | -0.00020 |
| OY17 | 0.00044  | 0.00085  | 0.00061  | -0.00020 | 0.00114  |
| OZ17 | -0.00126 | -0.00173 | -0.00136 | 0.00042  | -0.00278 |

|                        | 31 A     | 32 A     | 33 A     | 34 A     | 35 A     |
|------------------------|----------|----------|----------|----------|----------|
| Wavenumbers [cm-1]     | 1607.89  | 1617.29  | 1625.94  | 1628.99  | 1674.99  |
| Intensities [km/mol]   | 65.01    | 7.45     | 55.51    | 11.41    | 89.12    |
| Intensities [relative] | 5.73     | 0.66     | 4.90     | 1.01     | 7.86     |
| CX1                    | -0.01883 | 0.00133  | 0.01771  | -0.01278 | 0.03301  |
| CY1                    | 0.01815  | 0.00009  | -0.02648 | 0.01721  | -0.03389 |
| CZ1                    | -0.05574 | 0.00804  | -0.04260 | 0.01913  | -0.04971 |
| NX2                    | 0.06730  | -0.00361 | -0.04117 | 0.03364  | -0.03561 |
| NY2                    | -0.07209 | 0.00462  | 0.04807  | -0.03950 | 0.04463  |
| NZ2                    | -0.01595 | -0.00090 | 0.04102  | -0.02913 | 0.03473  |
| CX3                    | -0.02365 | 0.00364  | -0.00515 | 0.00278  | 0.00003  |
| CY3                    | 0.02559  | -0.00432 | 0.00575  | -0.00346 | 0.00105  |
| CZ3                    | -0.04745 | 0.00278  | 0.03003  | -0.02611 | 0.02011  |
| NX4                    | 0.00074  | 0.00009  | -0.00385 | 0.00144  | -0.01515 |
| NY4                    | -0.00221 | 0.00093  | 0.00247  | -0.00038 | 0.01557  |
| NZ4                    | 0.03423  | -0.00840 | 0.06373  | -0.03728 | 0.03012  |
| CX5                    | 0.04567  | -0.00234 | -0.00993 | 0.02110  | 0.08603  |
| CY5                    | -0.04893 | 0.00198  | 0.01400  | -0.02574 | -0.09397 |
| CZ5                    | -0.02962 | 0.00508  | -0.04833 | 0.02514  | -0.04650 |
| CX6                    | -0.05224 | -0.00736 | 0.01113  | -0.02359 | -0.11345 |
| CY6                    | 0.04972  | -0.01327 | -0.01341 | 0.02694  | 0.12055  |
| CZ6                    | 0.04118  | -0.00564 | 0.03362  | -0.01485 | 0.04866  |
| OX7                    | -0.01186 | -0.00045 | 0.02043  | -0.01515 | 0.01287  |
| OY7                    | 0.01254  | 0.00052  | -0.02190 | 0.01640  | -0.01408 |
| OZ7                    | 0.02524  | 0.00107  | -0.04797 | 0.03502  | -0.02826 |
| SX8                    | 0.00029  | -0.00013 | 0.00137  | -0.00046 | -0.00067 |
| SY8                    | -0.00027 | -0.00001 | -0.00167 | 0.00058  | 0.00070  |
| SZ8                    | 0.00122  | -0.00008 | 0.00233  | -0.00125 | 0.00224  |
| CX9                    | 0.01930  | -0.03837 | 0.01501  | -0.00336 | 0.01680  |
| CY9                    | -0.02257 | -0.03714 | -0.00811 | 0.01146  | -0.02307 |
| CZ9                    | 0.01243  | 0.00031  | 0.00968  | -0.00943 | -0.03751 |
| HX10                   | 0.15551  | 0.50677  | 0.08450  | -0.12886 | -0.12285 |
| HY10                   | -0.10813 | 0.47647  | -0.14970 | 0.05385  | 0.16815  |
| HZ10                   | -0.09370 | 0.00779  | -0.09109 | 0.06562  | 0.10957  |
| HX11                   | -0.27124 | 0.08889  | -0.30203 | 0.20910  | 0.20190  |
| HY11                   | 0.03641  | -0.04357 | 0.05245  | -0.03008 | -0.05840 |
| HZ11                   | -0.11016 | 0.46231  | -0.07966 | -0.00065 | 0.05747  |
| HX12                   | -0.02376 | -0.03451 | -0.03066 | 0.02879  | 0.04128  |
| HY12                   | 0.28556  | 0.13354  | 0.28960  | -0.22649 | -0.19685 |
| HZ12                   | -0.15706 | -0.46026 | -0.02241 | 0.06462  | 0.02155  |
| HX13                   | 0.00203  | 0.00096  | 0.00501  | -0.00523 | -0.01815 |
| HY13                   | -0.00024 | 0.00185  | 0.00309  | -0.00093 | 0.01384  |
| HZ13                   | 0.01299  | 0.02520  | -0.29752 | 0.21102  | 0.01019  |
| HX14                   | -0.22481 | 0.00873  | 0.14205  | -0.11524 | 0.12595  |
| HY14                   | 0.28216  | -0.01576 | -0.14550 | 0.14876  | -0.17633 |
| HZ14                   | 0.20605  | -0.01245 | -0.08310 | 0.08521  | -0.09555 |
| HX15                   | -0.04471 | 0.00021  | 0.02582  | -0.02442 | 0.00771  |
| HY15                   | 0.08382  | -0.01021 | -0.01370 | 0.01560  | -0.03838 |
| HZ15                   | 0.38700  | -0.03315 | 0.01248  | 0.05027  | 0.15245  |
| OX16                   | -0.00409 | 0.00505  | 0.02702  | 0.03645  | -0.00279 |
| OY16                   | 0.00569  | -0.00697 | -0.03873 | -0.05185 | 0.00497  |
| OZ16                   | -0.01329 | 0.01669  | 0.09308  | 0.12475  | -0.01204 |
| OX17                   | 0.00380  | -0.00490 | -0.02764 | -0.03693 | 0.00403  |
| OY17                   | -0.00566 | 0.00700  | 0.03866  | 0.05185  | -0.00483 |
| OZ17                   | 0.01362  | -0.01676 | -0.09290 | -0.12451 | 0.01168  |

|                        | 36 A     | 37 A     | 38 A     | 39 A     | 40 A     |
|------------------------|----------|----------|----------|----------|----------|
| Wavenumbers [cm-1]     | 1985.61  | 3191.24  | 3245.52  | 3320.22  | 3403.41  |
| Intensities [km/mol]   | 1133.94  | 26.53    | 25.85    | 1.99     | 8.69     |
| Intensities [relative] | 100.00   | 2.34     | 2.28     | 0.18     | 0.77     |
| CX1                    | -0.00240 | 0.00087  | 0.00009  | 0.00125  | -0.06560 |
| CY1                    | 0.00493  | -0.00004 | -0.00001 | -0.00071 | 0.04966  |
| CZ1                    | 0.00512  | -0.00079 | 0.00023  | -0.00009 | -0.00899 |
| NX2                    | 0.02464  | 0.00028  | 0.00006  | 0.00007  | 0.00080  |
| NY2                    | -0.02848 | -0.00024 | 0.00016  | -0.00024 | -0.00183 |
| NZ2                    | -0.03001 | 0.00033  | 0.00002  | 0.00006  | -0.00106 |

|      |          |          |          |          |          |
|------|----------|----------|----------|----------|----------|
| CX3  | -0.08430 | -0.00015 | -0.00000 | -0.00014 | 0.00049  |
| CY3  | 0.09053  | 0.00018  | -0.00002 | 0.00016  | -0.00092 |
| CZ3  | 0.19252  | -0.00057 | 0.00005  | -0.00014 | -0.00025 |
| NX4  | 0.00765  | -0.00013 | -0.00004 | 0.00012  | 0.00004  |
| NY4  | -0.00726 | 0.00006  | 0.00004  | -0.00023 | -0.00004 |
| NZ4  | -0.04369 | 0.00038  | -0.00002 | 0.00009  | -0.00016 |
| CX5  | 0.00040  | 0.00033  | -0.00011 | 0.00016  | 0.00045  |
| CY5  | -0.00124 | -0.00023 | -0.00015 | -0.00003 | -0.00057 |
| CZ5  | 0.00678  | 0.00025  | -0.00006 | -0.00012 | 0.00013  |
| CX6  | -0.00034 | 0.00061  | -0.00051 | -0.00029 | -0.00046 |
| CY6  | 0.00053  | -0.00053 | 0.00003  | 0.00025  | -0.00067 |
| CZ6  | -0.00082 | -0.00047 | -0.00010 | 0.00097  | 0.00134  |
| OX7  | 0.04497  | -0.00009 | 0.00001  | -0.00000 | -0.00012 |
| OY7  | -0.04834 | 0.00008  | -0.00002 | 0.00002  | 0.00020  |
| OZ7  | -0.10354 | 0.00030  | -0.00005 | 0.00009  | 0.00014  |
| SX8  | -0.00051 | -0.00006 | -0.00001 | -0.00026 | 0.00012  |
| SY8  | 0.00063  | 0.00010  | -0.00000 | 0.00030  | -0.00012 |
| SZ8  | -0.00055 | -0.00010 | 0.00003  | -0.00000 | 0.00009  |
| CX9  | 0.00021  | -0.03896 | -0.06214 | -0.03699 | -0.00149 |
| CY9  | -0.00091 | 0.03243  | -0.06218 | 0.04253  | 0.00204  |
| CZ9  | -0.00025 | 0.01936  | -0.00386 | -0.06505 | -0.00106 |
| HX10 | -0.00079 | -0.10869 | 0.00043  | 0.32298  | 0.00597  |
| HY10 | 0.00155  | 0.11767  | -0.02541 | -0.35405 | -0.00643 |
| HZ10 | 0.00084  | -0.24667 | 0.02932  | 0.77527  | 0.01110  |
| HX11 | -0.00190 | -0.11980 | 0.11368  | -0.04418 | -0.00259 |
| HY11 | -0.00182 | -0.61056 | 0.69233  | -0.19892 | -0.01403 |
| HZ11 | 0.00045  | 0.00359  | -0.00616 | -0.00665 | -0.00107 |
| HX12 | 0.00112  | 0.68702  | 0.63234  | 0.17322  | 0.01447  |
| HY12 | 0.00154  | 0.10282  | 0.07588  | 0.03294  | 0.00212  |
| HZ12 | 0.00101  | 0.02199  | 0.02114  | -0.00258 | -0.00075 |
| HX13 | 0.00109  | -0.00121 | 0.00050  | -0.00118 | -0.00008 |
| HY13 | -0.00674 | 0.00104  | -0.00049 | 0.00098  | 0.00003  |
| HZ13 | 0.18107  | 0.00010  | 0.00014  | -0.00065 | -0.00022 |
| HX14 | -0.11337 | -0.00159 | -0.00044 | 0.00033  | -0.00373 |
| HY14 | 0.12769  | -0.00185 | -0.00084 | 0.00063  | 0.01013  |
| HZ14 | 0.07104  | -0.00118 | -0.00018 | -0.00034 | -0.00311 |
| HX15 | -0.00480 | -0.01328 | -0.00003 | -0.01651 | 0.76771  |
| HY15 | 0.00357  | 0.00960  | -0.00129 | 0.01206  | -0.55506 |
| HZ15 | 0.00842  | 0.00037  | -0.00008 | -0.00071 | 0.10976  |
| OX16 | 0.00025  | 0.00014  | -0.00003 | 0.00004  | -0.00004 |
| OY16 | -0.00030 | -0.00005 | 0.00004  | -0.00007 | -0.00001 |
| OZ16 | 0.00064  | 0.00005  | -0.00004 | 0.00016  | 0.00007  |
| OX17 | -0.00011 | 0.00008  | 0.00004  | -0.00005 | -0.00007 |
| OY17 | 0.00030  | 0.00008  | -0.00003 | 0.00007  | -0.00002 |
| OZ17 | -0.00067 | -0.00014 | 0.00005  | -0.00016 | 0.00001  |

|                        | 41 A     | 42 A     |
|------------------------|----------|----------|
| Wavenumbers [cm-1]     | 3909.32  | 3917.65  |
| Intensities [km/mol]   | 158.99   | 72.40    |
| Intensities [relative] | 14.02    | 6.39     |
| CX1                    | -0.00068 | -0.00011 |
| CY1                    | 0.00090  | 0.00044  |
| CZ1                    | 0.00195  | 0.00063  |
| NX2                    | -0.01771 | -0.00528 |
| NY2                    | 0.02350  | 0.00695  |
| NZ2                    | -0.06172 | -0.01739 |
| CX3                    | 0.00082  | -0.00006 |
| CY3                    | -0.00069 | 0.00003  |
| CZ3                    | -0.00014 | -0.00088 |
| NX4                    | -0.01217 | 0.04548  |
| NY4                    | 0.01395  | -0.05176 |
| NZ4                    | 0.00009  | 0.00105  |
| CX5                    | 0.00036  | -0.00052 |
| CY5                    | -0.00049 | 0.00042  |
| CZ5                    | -0.00026 | 0.00191  |
| CX6                    | -0.00012 | -0.00050 |
| CY6                    | 0.00014  | 0.00060  |
| CZ6                    | 0.00012  | 0.00039  |
| OX7                    | 0.00006  | 0.00009  |
| OY7                    | -0.00008 | -0.00011 |
| OZ7                    | -0.00014 | -0.00017 |



|      |          |          |
|------|----------|----------|
| SX8  | 0.00003  | -0.00015 |
| SY8  | -0.00004 | 0.00019  |
| SZ8  | 0.00000  | -0.00019 |
| CX9  | -0.00005 | 0.00009  |
| CY9  | 0.00033  | -0.00054 |
| CZ9  | -0.00009 | -0.00001 |
| HX10 | 0.00008  | -0.00027 |
| HY10 | -0.00023 | 0.00068  |
| HZ10 | 0.00039  | -0.00069 |
| HX11 | -0.00024 | 0.00017  |
| HY11 | -0.00125 | 0.00101  |
| HZ11 | 0.00007  | 0.00008  |
| HX12 | 0.00128  | -0.00050 |
| HY12 | 0.00030  | -0.00023 |
| HZ12 | 0.00013  | 0.00012  |
| HX13 | 0.16825  | -0.60831 |
| HY13 | -0.19266 | 0.69679  |
| HZ13 | 0.00496  | -0.01685 |
| HX14 | 0.23697  | 0.06419  |
| HY14 | -0.32131 | -0.08982 |
| HZ14 | 0.83511  | 0.22969  |
| HX15 | 0.00421  | 0.00099  |
| HY15 | -0.00474 | -0.00136 |
| HZ15 | -0.00122 | -0.00019 |
| OX16 | -0.00005 | 0.00005  |
| OY16 | 0.00004  | 0.00000  |
| OZ16 | -0.00011 | -0.00005 |
| OX17 | -0.00001 | 0.00007  |
| OY17 | -0.00005 | 0.00000  |
| OZ17 | 0.00013  | 0.00000  |

Normal Modes of imaginary frequencies

|                        |          |
|------------------------|----------|
|                        | 1        |
| Wavenumbers [cm-1]     | 18.80    |
| Intensities [km/mol]   | 6.55     |
| Intensities [relative] | 0.58     |
| CX1                    | -0.03929 |
| CY1                    | -0.06623 |
| CZ1                    | -0.00368 |
| NX2                    | 0.05801  |
| NY2                    | 0.03186  |
| NZ2                    | -0.01355 |
| CX3                    | 0.00672  |
| CY3                    | -0.01726 |
| CZ3                    | -0.01397 |
| NX4                    | -0.04445 |
| NY4                    | -0.05595 |
| NZ4                    | -0.01159 |
| CX5                    | -0.01159 |
| CY5                    | -0.01655 |
| CZ5                    | -0.00831 |
| CX6                    | -0.00270 |
| CY6                    | 0.00632  |
| CZ6                    | -0.02036 |
| OX7                    | 0.00837  |
| OY7                    | -0.01822 |
| OZ7                    | -0.01486 |
| SX8                    | 0.01807  |
| SY8                    | -0.01116 |
| SZ8                    | -0.00193 |
| CX9                    | 0.10527  |
| CY9                    | 0.11636  |
| CZ9                    | -0.01831 |
| HX10                   | 0.01780  |
| HY10                   | 0.02689  |
| HZ10                   | -0.02250 |
| HX11                   | 0.31736  |
| HY11                   | 0.07781  |
| HZ11                   | 0.00525  |

|      |          |
|------|----------|
| HX12 | 0.07952  |
| HY12 | 0.32819  |
| HZ12 | -0.02450 |
| HX13 | -0.05130 |
| HY13 | -0.06016 |
| HZ13 | -0.00496 |
| HX14 | 0.04080  |
| HY14 | 0.02697  |
| HZ14 | -0.01051 |
| HX15 | 0.04639  |
| HY15 | 0.04523  |
| HZ15 | -0.03248 |
| OX16 | -0.05458 |
| OY16 | 0.00916  |
| OZ16 | 0.04338  |
| OX17 | -0.07410 |
| OY17 | 0.00749  |
| OZ17 | 0.05154  |

Normal Modes of low/zero frequencies

|                        | 1        | 2        | 3        | 4        | 5        |
|------------------------|----------|----------|----------|----------|----------|
| Wavenumbers [cm-1]     | 0.00     | 0.00     | 0.00     | 0.00     | 0.00     |
| Intensities [km/mol]   | 0.00     | 0.00     | 0.00     | 0.00     | 0.00     |
| Intensities [relative] | 0.00     | 0.00     | 0.00     | 0.00     | 0.00     |
| CX1                    | 0.00685  | -0.00174 | -0.00515 | -0.03940 | -0.02663 |
| CY1                    | 0.05200  | 0.00237  | -0.05650 | -0.05537 | 0.03455  |
| CZ1                    | -0.01896 | -0.05687 | -0.04325 | 0.04225  | 0.04764  |
| NX2                    | 0.03533  | 0.00420  | 0.03882  | -0.02940 | -0.03409 |
| NY2                    | 0.07806  | -0.01043 | -0.06691 | -0.02434 | 0.01938  |
| NZ2                    | -0.02143 | -0.04731 | -0.01908 | 0.02930  | 0.05289  |
| CX3                    | 0.03958  | 0.01952  | 0.05431  | 0.00938  | -0.03436 |
| CY3                    | 0.08203  | 0.00383  | -0.05261 | 0.01198  | 0.01910  |
| CZ3                    | -0.02137 | -0.03286 | 0.02413  | 0.00668  | 0.06004  |
| NX4                    | 0.01348  | 0.03007  | 0.02391  | 0.04154  | -0.02658 |
| NY4                    | 0.05771  | 0.03157  | -0.02742 | 0.01381  | 0.03523  |
| NZ4                    | -0.02143 | -0.02678 | 0.04216  | -0.00277 | 0.06306  |
| CX5                    | -0.01610 | 0.02661  | -0.02009 | 0.03814  | -0.01867 |
| CY5                    | 0.02992  | 0.04517  | -0.01638 | -0.01939 | 0.05140  |
| CZ5                    | -0.02276 | -0.03369 | 0.01921  | 0.00909  | 0.05992  |
| CX6                    | -0.01997 | 0.01083  | -0.03532 | -0.00188 | -0.01853 |
| CY6                    | 0.02651  | 0.03096  | -0.03059 | -0.05439 | 0.05139  |
| CZ6                    | -0.02168 | -0.04866 | -0.02356 | 0.03161  | 0.05228  |
| OX7                    | 0.06431  | 0.02343  | 0.09172  | 0.01483  | -0.04091 |
| OY7                    | 0.10506  | -0.00721 | -0.06153 | 0.03994  | 0.00573  |
| OZ7                    | -0.02138 | -0.02601 | 0.04455  | -0.00401 | 0.06343  |
| SX8                    | -0.04529 | 0.04321  | -0.05112 | 0.08650  | -0.00969 |
| SY8                    | 0.00234  | 0.08011  | 0.01560  | -0.01051 | 0.07013  |
| SZ8                    | -0.02481 | -0.02224 | 0.04972  | -0.00714 | 0.06602  |
| CX9                    | -0.04981 | 0.00515  | -0.08106 | -0.01096 | -0.01068 |
| CY9                    | -0.00148 | 0.04246  | -0.02162 | -0.09210 | 0.06740  |
| CZ9                    | -0.02276 | -0.05765 | -0.05227 | 0.04651  | 0.04805  |
| HX10                   | -0.06887 | 0.01456  | -0.10220 | 0.01693  | -0.00490 |
| HY10                   | -0.01927 | 0.06449  | -0.00149 | -0.08738 | 0.07942  |
| HZ10                   | -0.02295 | -0.05164 | -0.03469 | 0.03728  | 0.05107  |
| HX11                   | -0.05429 | -0.01129 | -0.09757 | -0.05259 | -0.01041 |
| HY11                   | -0.00072 | 0.04535  | -0.01872 | -0.08484 | 0.06737  |
| HZ11                   | 0.00385  | -0.07709 | -0.06331 | 0.05557  | 0.03284  |
| HX12                   | -0.04862 | 0.00727  | -0.07807 | -0.00572 | -0.01088 |
| HY12                   | -0.00542 | 0.02545  | -0.03862 | -0.13374 | 0.06732  |
| HZ12                   | -0.04998 | -0.05155 | -0.08210 | 0.05876  | 0.05678  |
| HX13                   | 0.01643  | 0.04161  | 0.03521  | 0.07078  | -0.02671 |
| HY13                   | 0.06027  | 0.04173  | -0.01724 | 0.03913  | 0.03517  |
| HZ13                   | -0.02243 | -0.01578 | 0.07320  | -0.01914 | 0.06872  |
| HX14                   | 0.05418  | -0.00401 | 0.06041  | -0.05413 | -0.03974 |
| HY14                   | 0.09591  | -0.03005 | -0.08467 | -0.02424 | 0.00763  |
| HZ14                   | -0.01985 | -0.05246 | -0.03165 | 0.03607  | 0.05001  |
| HX15                   | 0.00701  | -0.01156 | -0.01100 | -0.06480 | -0.02724 |
| HY15                   | 0.05090  | -0.01312 | -0.07178 | -0.08794 | 0.03318  |
| HZ15                   | -0.02568 | -0.06476 | -0.07865 | 0.05995  | 0.04514  |

|      |          |          |          |          |          |
|------|----------|----------|----------|----------|----------|
| OX16 | -0.02805 | -0.01642 | -0.06362 | -0.07076 | -0.01791 |
| OY16 | 0.03597  | 0.06864  | 0.00712  | 0.03937  | 0.05119  |
| OZ16 | 0.06993  | -0.08798 | 0.02078  | 0.01972  | 0.01359  |
| OX17 | -0.00568 | -0.02691 | -0.03845 | -0.10205 | -0.02466 |
| OY17 | 0.05723  | 0.04479  | -0.01450 | 0.03856  | 0.03714  |
| OZ17 | 0.07220  | -0.09483 | 0.00436  | 0.02860  | 0.00972  |

|                        | 6        | 7        | 8        |
|------------------------|----------|----------|----------|
| Wavenumbers [cm-1]     | 0.00     | 34.26    | 42.47    |
| Intensities [km/mol]   | 0.00     | 0.00     | 0.00     |
| Intensities [relative] | 0.00     | 0.00     | 0.00     |
| CX1                    | 0.07438  | 0.02790  | 0.06738  |
| CY1                    | 0.00546  | 0.02154  | 0.03319  |
| CZ1                    | 0.01620  | -0.03962 | 0.00796  |
| NX2                    | 0.08046  | -0.03192 | 0.03088  |
| NY2                    | 0.00228  | -0.04345 | 0.00223  |
| NZ2                    | 0.02050  | -0.02979 | 0.00925  |
| CX3                    | 0.07966  | -0.03326 | -0.00237 |
| CY3                    | 0.00151  | -0.04412 | -0.02840 |
| CZ3                    | 0.02827  | -0.02283 | 0.00615  |
| NX4                    | 0.07222  | 0.01967  | 0.00441  |
| NY4                    | 0.00420  | 0.01142  | -0.02796 |
| NZ4                    | 0.03152  | -0.02004 | 0.00432  |
| CX5                    | 0.06559  | 0.02038  | 0.01231  |
| CY5                    | 0.00760  | 0.02038  | -0.02342 |
| CZ5                    | 0.02737  | -0.02476 | 0.00462  |
| CX6                    | 0.06653  | 0.02130  | 0.04527  |
| CY6                    | 0.00830  | 0.01605  | 0.00290  |
| CZ6                    | 0.01969  | -0.02959 | 0.01011  |
| OX7                    | 0.08508  | -0.07584 | -0.03398 |
| OY7                    | -0.00132 | -0.09020 | -0.05400 |
| OZ7                    | 0.03195  | -0.01918 | 0.00468  |
| SX8                    | 0.05670  | 0.02262  | -0.04550 |
| SY8                    | 0.01060  | 0.04214  | -0.07026 |
| SZ8                    | 0.03282  | -0.01851 | 0.00081  |
| CX9                    | 0.06010  | -0.00855 | 0.02996  |
| CY9                    | 0.01176  | -0.00614 | -0.01797 |
| CZ9                    | 0.01451  | -0.03479 | 0.01181  |
| HX10                   | 0.05447  | 0.06868  | 0.07506  |
| HY10                   | 0.01370  | 0.07625  | 0.02301  |
| HZ10                   | 0.01767  | -0.02951 | 0.01163  |
| HX11                   | 0.06097  | -0.13118 | -0.03982 |
| HY11                   | 0.01161  | 0.01553  | -0.00571 |
| HZ11                   | 0.01298  | -0.08813 | -0.01194 |
| HX12                   | 0.06014  | 0.00615  | 0.03814  |
| HY12                   | 0.01258  | -0.13020 | -0.08820 |
| HZ12                   | 0.00868  | 0.00560  | 0.03544  |
| HX13                   | 0.07156  | -0.00140 | -0.02990 |
| HY13                   | 0.00369  | -0.00747 | -0.05818 |
| HZ13                   | 0.03708  | -0.01567 | 0.00085  |
| HX14                   | 0.08590  | -0.06085 | 0.02743  |
| HY14                   | 0.00028  | -0.08002 | -0.00277 |
| HZ14                   | 0.01827  | -0.03564 | 0.00834  |
| HX15                   | 0.07558  | 0.00968  | 0.06423  |
| HY15                   | 0.00588  | -0.00123 | 0.03119  |
| HZ15                   | 0.00972  | -0.03177 | 0.01558  |
| OX16                   | 0.06781  | 0.00906  | -0.01733 |
| OY16                   | 0.00640  | 0.01873  | 0.12300  |
| OZ16                   | 0.02923  | 0.11515  | -0.02572 |
| OX17                   | 0.07436  | 0.01821  | -0.01146 |
| OY17                   | 0.00403  | 0.01729  | 0.12597  |
| OZ17                   | 0.02631  | 0.11083  | -0.02674 |

#### 4. Frequencies for PS-02 on TT0 (reactant) state

|                     |            |
|---------------------|------------|
| Imaginary Vibration | Wavenumber |
| Nr                  | [1/cm]     |
| 1                   | 18.80      |

|               |            |
|---------------|------------|
| Low Vibration | Wavenumber |
| Nr            | [1/cm]     |

|   |       |
|---|-------|
| 1 | 0.00  |
| 2 | 0.00  |
| 3 | 0.00  |
| 4 | 0.00  |
| 5 | 0.00  |
| 6 | 0.00  |
| 7 | 34.26 |
| 8 | 42.47 |

| Vibration Nr | Wavenumber [1/cm] |
|--------------|-------------------|
| 1            | 101.98            |
| 2            | 107.89            |
| 3            | 123.77            |
| 4            | 192.00            |
| 5            | 219.17            |
| 6            | 247.82            |
| 7            | 266.01            |
| 8            | 295.15            |
| 9            | 332.39            |
| 10           | 341.31            |
| 11           | 454.29            |
| 12           | 480.44            |
| 13           | 512.49            |
| 14           | 553.50            |
| 15           | 573.88            |
| 16           | 581.90            |
| 17           | 721.11            |
| 18           | 824.33            |
| 19           | 847.34            |
| 20           | 938.11            |
| 21           | 1033.16           |
| 22           | 1126.97           |
| 23           | 1133.52           |
| 24           | 1243.14           |
| 25           | 1280.92           |
| 26           | 1339.31           |
| 27           | 1489.51           |
| 28           | 1548.64           |
| 29           | 1555.83           |
| 30           | 1599.85           |
| 31           | 1607.89           |
| 32           | 1617.29           |
| 33           | 1625.94           |
| 34           | 1628.99           |
| 35           | 1674.99           |
| 36           | 1985.61           |
| 37           | 3191.24           |
| 38           | 3245.52           |
| 39           | 3320.22           |
| 40           | 3403.41           |
| 41           | 3909.32           |
| 42           | 3917.65           |

#### 5. Normal modes for PS-02 on SS2 (product) state

##### Normal Modes

|                        | 1 A      | 2 A      | 3 A     | 4 A      | 5 A       |
|------------------------|----------|----------|---------|----------|-----------|
| Wavenumbers [cm-1]     | 109.67   | 124.24   | 142.70  | 198.30   | 272.79    |
| Intensities [km/mol]   | 0.07     | 0.95     | 0.02    | 0.01     | 3.80      |
| Intensities [relative] | 0.01     | 0.09     | 0.00    | 0.00     | 0.35      |
| CX1                    | -0.03961 | -0.05618 | 0.03088 | -0.00263 | 0.00604   |
| CY1                    | -0.03644 | -0.04798 | 0.02725 | -0.00261 | -0.00698  |
| CZ1                    | -0.00742 | -0.00131 | 0.00269 | -0.00123 | 0.00226   |
| NX2                    | -0.09276 | -0.06344 | 0.05145 | 0.02840  | 0.00240   |
| NY2                    | -0.08434 | -0.05438 | 0.04508 | 0.02340  | -0.00491  |
| NZ2                    | -0.00892 | -0.00147 | 0.00355 | 0.00020  | -0.00244  |
| CX3                    | 0.00997  | -0.01182 | 0.01137 | 0.00534  | 0.00402   |
| CY3                    | 0.00423  | -0.00989 | 0.01077 | 0.00346  | -0.00365  |
| CZ3                    | -0.00340 | 0.00058  | 0.00137 | -0.00067 | -0.002821 |

|      |          |          |          |          |          |
|------|----------|----------|----------|----------|----------|
| NX4  | 0.07143  | 0.04476  | 0.12565  | 0.00005  | 0.02482  |
| NY4  | 0.05938  | 0.03855  | 0.10893  | -0.00062 | -0.02784 |
| NZ4  | -0.00001 | 0.00274  | 0.00607  | -0.00075 | -0.03364 |
| CX5  | 0.02107  | 0.00313  | 0.05038  | -0.00559 | 0.01930  |
| CY5  | 0.01819  | 0.00219  | 0.04382  | -0.00494 | -0.01788 |
| CZ5  | -0.00287 | 0.00104  | 0.00286  | -0.00110 | -0.03643 |
| CX6  | 0.02676  | -0.02672 | 0.02469  | -0.01785 | 0.02788  |
| CY6  | 0.02301  | -0.02285 | 0.02181  | -0.01513 | -0.02705 |
| CZ6  | -0.00417 | 0.00007  | 0.00219  | -0.00137 | -0.01683 |
| OX7  | 0.04020  | -0.01462 | -0.10557 | -0.00949 | -0.01885 |
| OY7  | 0.02879  | -0.01192 | -0.09000 | -0.00959 | 0.02540  |
| OZ7  | -0.00144 | 0.00033  | -0.00369 | -0.00122 | -0.05088 |
| SX8  | -0.04404 | -0.01798 | -0.02613 | -0.00845 | -0.07045 |
| SY8  | -0.03531 | -0.01623 | -0.02207 | -0.00669 | 0.07948  |
| SZ8  | -0.00510 | -0.00024 | -0.00125 | -0.00102 | 0.04927  |
| CX9  | 0.10910  | -0.06306 | -0.03351 | 0.01683  | 0.09364  |
| CY9  | 0.09634  | -0.05478 | -0.02883 | 0.01327  | -0.11306 |
| CZ9  | -0.00114 | -0.00139 | -0.00050 | 0.00082  | 0.04378  |
| HX10 | 0.10889  | -0.03632 | -0.04912 | 0.49327  | 0.13387  |
| HY10 | 0.14224  | -0.08323 | -0.05590 | -0.10785 | -0.15846 |
| HZ10 | 0.06053  | -0.01432 | -0.05216 | 0.28809  | 0.01924  |
| HX11 | 0.15586  | -0.08623 | -0.06530 | -0.00289 | 0.13055  |
| HY11 | 0.09421  | -0.02530 | -0.04343 | 0.51712  | -0.16107 |
| HZ11 | -0.05877 | 0.01105  | 0.04788  | -0.25924 | 0.02358  |
| HX12 | 0.13094  | -0.09665 | -0.03436 | -0.40333 | 0.07782  |
| HY12 | 0.11413  | -0.08297 | -0.02925 | -0.34126 | -0.10058 |
| HZ12 | -0.00275 | -0.00238 | 0.00061  | -0.02309 | 0.14457  |
| HX13 | 0.10008  | 0.06772  | 0.09662  | -0.00818 | 0.02453  |
| HY13 | 0.08383  | 0.05822  | 0.08406  | -0.00769 | -0.02806 |
| HZ13 | 0.00258  | 0.00341  | 0.00465  | -0.00075 | -0.04351 |
| HX14 | -0.12170 | -0.10028 | -0.06121 | 0.00880  | -0.00113 |
| HY14 | -0.11001 | -0.08569 | -0.05101 | 0.00656  | 0.00002  |
| HZ14 | -0.01079 | -0.00322 | -0.00183 | -0.00079 | 0.00077  |
| HX15 | -0.05547 | -0.09375 | 0.01131  | -0.00455 | 0.00341  |
| HY15 | -0.05019 | -0.07999 | 0.01051  | -0.00433 | -0.00773 |
| HZ15 | -0.00984 | -0.00259 | 0.00216  | -0.00175 | -0.01422 |
| OX16 | -0.03767 | 0.10397  | -0.02431 | -0.00348 | -0.00025 |
| OY16 | -0.02628 | 0.08631  | -0.02449 | 0.00203  | -0.00037 |
| OZ16 | 0.01751  | -0.00106 | -0.00474 | 0.00416  | 0.00017  |
| OX17 | -0.01123 | 0.10091  | -0.02930 | 0.00270  | -0.00008 |
| OY17 | -0.00623 | 0.09091  | -0.02693 | 0.00155  | -0.00032 |
| OZ17 | 0.01745  | 0.00137  | -0.00403 | 0.00209  | 0.00015  |

|                        | 6 A      | 7 A      | 8 A      | 9 A      | 10 A     |
|------------------------|----------|----------|----------|----------|----------|
| Wavenumbers [cm-1]     | 323.04   | 350.49   | 391.68   | 465.64   | 539.52   |
| Intensities [km/mol]   | 1.30     | 5.52     | 18.19    | 16.35    | 99.09    |
| Intensities [relative] | 0.12     | 0.50     | 1.66     | 1.49     | 9.05     |
| CX1                    | 0.07668  | 0.02717  | 0.11811  | -0.01916 | -0.02539 |
| CY1                    | 0.06403  | -0.03851 | 0.10168  | 0.02238  | -0.02363 |
| CZ1                    | 0.00460  | 0.02193  | 0.00364  | -0.06023 | -0.00001 |
| NX2                    | -0.08731 | 0.00204  | -0.06772 | -0.05000 | -0.03041 |
| NY2                    | -0.07434 | 0.00283  | -0.05780 | -0.06316 | -0.02452 |
| NZ2                    | -0.00228 | 0.01801  | -0.00336 | -0.08510 | -0.00313 |
| CX3                    | -0.02702 | -0.00589 | -0.01367 | -0.05116 | -0.01339 |
| CY3                    | -0.02236 | 0.00987  | -0.01160 | 0.05967  | -0.01150 |
| CZ3                    | -0.00043 | -0.02069 | -0.00061 | 0.00661  | -0.00219 |
| NX4                    | -0.02676 | 0.03235  | 0.05083  | -0.04201 | 0.02226  |
| NY4                    | -0.02396 | -0.03473 | 0.04325  | 0.04865  | 0.01939  |
| NZ4                    | -0.00092 | -0.02383 | 0.00207  | 0.01549  | -0.00029 |
| CX5                    | 0.05068  | 0.04556  | -0.08512 | 0.01557  | 0.04307  |
| CY5                    | 0.04186  | -0.05506 | -0.07390 | -0.01769 | 0.03581  |
| CZ5                    | 0.00309  | 0.01580  | -0.00350 | 0.03586  | 0.00168  |
| CX6                    | 0.13110  | 0.03981  | -0.08231 | 0.01743  | -0.01900 |
| CY6                    | 0.11021  | -0.05230 | -0.07214 | -0.01561 | -0.01692 |
| CZ6                    | 0.00551  | 0.00468  | -0.00409 | -0.07433 | 0.00077  |
| OX7                    | 0.02184  | -0.07005 | 0.00101  | 0.00760  | -0.01408 |
| OY7                    | 0.02223  | 0.08391  | 0.00249  | -0.01233 | -0.01430 |
| OZ7                    | 0.00069  | -0.07991 | -0.00054 | 0.06786  | -0.00118 |
| SX8                    | -0.00840 | 0.00443  | 0.01618  | 0.02776  | -0.00521 |
| SY8                    | -0.00889 | -0.00931 | 0.01320  | -0.03709 | -0.00379 |
| SZ8                    | 0.00049  | 0.07700  | 0.00262  | 0.07087  | -0.00012 |

|      |          |          |          |          |          |
|------|----------|----------|----------|----------|----------|
| CX9  | -0.05231 | -0.04867 | -0.00465 | 0.05295  | 0.00216  |
| CY9  | -0.04053 | 0.06360  | -0.00571 | -0.05601 | 0.00372  |
| CZ9  | -0.00697 | -0.08656 | -0.00052 | -0.07776 | 0.00188  |
| HX10 | 0.03161  | -0.11526 | 0.00274  | 0.08079  | -0.00203 |
| HY10 | -0.18427 | 0.13831  | 0.02827  | -0.08359 | 0.03290  |
| HZ10 | -0.12118 | -0.04858 | 0.05227  | -0.08842 | 0.03708  |
| HX11 | -0.18936 | -0.10995 | 0.03302  | 0.07702  | 0.03031  |
| HY11 | 0.06303  | 0.13932  | -0.00062 | -0.08649 | -0.00087 |
| HZ11 | 0.10563  | -0.05287 | -0.05017 | -0.09054 | -0.03049 |
| HX12 | -0.19259 | -0.02192 | -0.00045 | 0.04274  | 0.02087  |
| HY12 | -0.15975 | 0.04512  | -0.00230 | -0.04883 | 0.01885  |
| HZ12 | -0.01819 | -0.24796 | -0.00078 | -0.01118 | 0.00026  |
| HX13 | -0.03617 | 0.03281  | 0.13379  | -0.04261 | -0.05332 |
| HY13 | -0.03200 | -0.03390 | 0.11428  | 0.05217  | -0.04535 |
| HZ13 | -0.00208 | -0.05798 | 0.00493  | -0.07034 | -0.00383 |
| HX14 | 0.03042  | -0.01343 | 0.06494  | -0.03793 | 0.70604  |
| HY14 | 0.02615  | 0.00968  | 0.05400  | 0.05198  | 0.60724  |
| HZ14 | 0.00334  | 0.02639  | 0.00236  | -0.09473 | 0.03370  |
| HX15 | 0.07169  | 0.02336  | 0.31441  | -0.02650 | -0.07129 |
| HY15 | 0.05980  | -0.03863 | 0.26944  | 0.02429  | -0.06271 |
| HZ15 | 0.00541  | 0.05821  | 0.01133  | 0.00932  | -0.00066 |
| OX16 | -0.01099 | -0.00046 | 0.00037  | 0.00000  | 0.00039  |
| OY16 | -0.01151 | -0.00007 | 0.00165  | 0.00010  | 0.00011  |
| OZ16 | -0.00166 | -0.00007 | -0.00057 | 0.00018  | 0.00008  |
| OX17 | -0.01073 | 0.00088  | -0.00279 | -0.00031 | 0.00096  |
| OY17 | -0.00757 | 0.00070  | -0.00074 | -0.00017 | 0.00103  |
| OZ17 | 0.00015  | -0.00021 | -0.00045 | 0.00019  | 0.00048  |

|                        | 11 A     | 12 A     | 13 A     | 14 A     | 15 A     |
|------------------------|----------|----------|----------|----------|----------|
| Wavenumbers [cm-1]     | 549.11   | 581.50   | 675.05   | 721.18   | 742.60   |
| Intensities [km/mol]   | 8.49     | 13.18    | 0.80     | 82.75    | 2.27     |
| Intensities [relative] | 0.78     | 1.20     | 0.07     | 7.56     | 0.21     |
| CX1                    | -0.02902 | 0.02640  | 0.05305  | -0.01154 | -0.10524 |
| CY1                    | 0.03151  | -0.03476 | 0.04793  | -0.01266 | 0.12021  |
| CZ1                    | 0.00331  | 0.09383  | 0.00185  | -0.00038 | 0.00270  |
| NX2                    | -0.00062 | -0.04448 | -0.01109 | 0.02763  | -0.03078 |
| NY2                    | -0.00226 | 0.05169  | -0.00833 | 0.02283  | 0.03573  |
| NZ2                    | 0.07336  | 0.01125  | -0.00052 | 0.00124  | 0.01782  |
| CX3                    | -0.00434 | -0.03569 | -0.01717 | -0.04784 | 0.00198  |
| CY3                    | -0.00069 | 0.04374  | -0.01395 | -0.04164 | -0.00263 |
| CZ3                    | 0.11784  | -0.03210 | -0.00055 | -0.00153 | -0.01134 |
| NX4                    | 0.05014  | -0.01885 | -0.04317 | -0.04503 | -0.07952 |
| NY4                    | -0.05927 | 0.02507  | -0.03940 | -0.03601 | -0.08940 |
| NZ4                    | 0.03993  | -0.05784 | -0.00294 | -0.00114 | -0.06570 |
| CX5                    | 0.01297  | 0.03674  | 0.16784  | 0.00042  | 0.04591  |
| CY5                    | -0.01423 | -0.04467 | 0.14062  | 0.00179  | -0.05390 |
| CZ5                    | -0.03521 | -0.04633 | 0.00663  | 0.00113  | -0.06642 |
| CX6                    | 0.01986  | 0.06226  | -0.10385 | 0.02091  | -0.03596 |
| CY6                    | -0.02337 | -0.07596 | -0.08882 | 0.01694  | 0.04840  |
| CZ6                    | -0.05894 | 0.04901  | -0.00455 | 0.00116  | -0.02921 |
| OX7                    | -0.04907 | 0.06451  | 0.01110  | 0.00243  | 0.03327  |
| OY7                    | 0.05206  | -0.07797 | 0.00869  | 0.00321  | -0.03932 |
| OZ7                    | 0.08961  | 0.06500  | 0.00146  | -0.00008 | 0.01306  |
| SX8                    | -0.01456 | -0.02750 | -0.01608 | -0.00424 | 0.01210  |
| SY8                    | 0.02026  | 0.03431  | -0.01342 | -0.00318 | -0.01607 |
| SZ8                    | -0.05616 | -0.02540 | -0.00078 | -0.00080 | 0.03609  |
| CX9                    | 0.03317  | -0.00762 | -0.01109 | 0.00369  | -0.03121 |
| CY9                    | -0.03192 | 0.00986  | -0.00824 | 0.00204  | 0.03429  |
| CZ9                    | -0.10724 | -0.02335 | 0.00073  | -0.00095 | 0.04680  |
| HX10                   | 0.02023  | -0.07801 | -0.02175 | 0.00509  | -0.02500 |
| HY10                   | -0.01573 | 0.08436  | 0.07093  | -0.01016 | 0.02473  |
| HZ10                   | -0.09830 | 0.00924  | 0.09759  | -0.01614 | 0.04035  |
| HX11                   | 0.02131  | -0.07377 | 0.06899  | -0.00890 | -0.02646 |
| HY11                   | -0.01673 | 0.09111  | -0.02369 | 0.00426  | 0.02730  |
| HZ11                   | -0.10184 | 0.01197  | -0.09040 | 0.01351  | 0.04537  |
| HX12                   | 0.03879  | 0.01833  | 0.03742  | -0.00291 | -0.03843 |
| HY12                   | -0.03559 | -0.01123 | 0.03203  | -0.00353 | 0.03838  |
| HZ12                   | -0.13732 | -0.19282 | 0.00067  | -0.00121 | 0.07715  |
| HX13                   | 0.04778  | -0.01755 | 0.01501  | 0.70052  | 0.09178  |
| HY13                   | -0.06040 | 0.03116  | 0.01051  | 0.60256  | -0.07962 |
| HZ13                   | 0.02685  | -0.14628 | -0.00253 | 0.03167  | -0.13632 |

|      |          |          |          |          |          |
|------|----------|----------|----------|----------|----------|
| HX14 | 0.06528  | -0.12006 | -0.12295 | 0.07674  | -0.00184 |
| HY14 | -0.05939 | 0.12253  | -0.10524 | 0.06470  | 0.00549  |
| HZ14 | 0.02872  | 0.06636  | -0.00655 | 0.00366  | -0.00649 |
| HX15 | -0.03001 | 0.02072  | 0.04350  | -0.02118 | -0.10261 |
| HY15 | 0.03142  | -0.03024 | 0.03980  | -0.02090 | 0.12412  |
| HZ15 | 0.02341  | 0.18987  | 0.00235  | -0.00039 | -0.02661 |
| OX16 | 0.00001  | -0.00018 | 0.00071  | -0.00016 | 0.00015  |
| OY16 | 0.00021  | -0.00010 | 0.00049  | -0.00005 | 0.00013  |
| OZ16 | 0.00025  | -0.00010 | 0.00007  | 0.00010  | 0.00002  |
| OX17 | 0.00007  | 0.00036  | -0.00002 | 0.00005  | -0.00040 |
| OY17 | -0.00010 | 0.00042  | -0.00025 | -0.00022 | -0.00035 |
| OZ17 | 0.00003  | -0.00014 | -0.00010 | -0.00003 | 0.00007  |

|                        | 16 A     | 17 A     | 18 A     | 19 A     | 20 A     |
|------------------------|----------|----------|----------|----------|----------|
| Wavenumbers [cm-1]     | 844.58   | 853.55   | 872.03   | 1021.97  | 1102.52  |
| Intensities [km/mol]   | 4.10     | 67.73    | 52.58    | 8.00     | 2.09     |
| Intensities [relative] | 0.37     | 6.19     | 4.80     | 0.73     | 0.19     |
| CX1                    | -0.05383 | 0.04657  | -0.09143 | -0.03215 | 0.05766  |
| CY1                    | 0.06364  | 0.03480  | -0.07859 | 0.03578  | -0.06826 |
| CZ1                    | 0.07489  | -0.00199 | -0.00348 | 0.02826  | 0.02370  |
| NX2                    | -0.00100 | -0.04952 | -0.01106 | -0.06397 | -0.03538 |
| NY2                    | -0.00951 | -0.04216 | -0.01027 | 0.07880  | 0.04080  |
| NZ2                    | 0.11783  | -0.00751 | -0.00023 | -0.09511 | 0.00740  |
| CX3                    | 0.03715  | 0.16856  | 0.07796  | 0.03042  | -0.00846 |
| CY3                    | -0.02442 | 0.14772  | 0.06746  | -0.03396 | 0.01047  |
| CZ3                    | -0.05697 | 0.01009  | 0.00320  | -0.02210 | -0.01522 |
| NX4                    | -0.03522 | -0.04958 | -0.02590 | 0.05219  | 0.04468  |
| NY4                    | 0.03587  | -0.04617 | -0.02125 | -0.06634 | -0.05209 |
| NZ4                    | 0.00217  | -0.00228 | -0.00076 | 0.11275  | 0.00326  |
| CX5                    | -0.04245 | -0.00974 | 0.02973  | -0.01148 | 0.00022  |
| CY5                    | 0.04952  | -0.01214 | 0.02512  | 0.00923  | -0.00205 |
| CZ5                    | 0.01586  | -0.00151 | 0.00179  | 0.07443  | 0.03005  |
| CX6                    | -0.02178 | -0.00554 | 0.00807  | 0.02528  | -0.02731 |
| CY6                    | 0.02166  | -0.00637 | 0.00665  | -0.03013 | 0.03111  |
| CZ6                    | -0.00201 | -0.00048 | 0.00054  | 0.01762  | -0.00136 |
| OX7                    | 0.04145  | -0.05467 | -0.02365 | 0.01198  | 0.00562  |
| OY7                    | -0.04926 | -0.04307 | -0.02026 | -0.01111 | -0.00667 |
| OZ7                    | -0.07651 | 0.00137  | -0.00121 | -0.05752 | 0.00404  |
| SX8                    | 0.01002  | 0.00022  | -0.00258 | -0.00688 | -0.00261 |
| SY8                    | -0.01282 | 0.00105  | -0.00196 | 0.00973  | 0.00358  |
| SZ8                    | 0.01761  | -0.00069 | -0.00036 | -0.02917 | -0.00887 |
| CX9                    | 0.04036  | -0.00355 | 0.00646  | 0.01517  | -0.05389 |
| CY9                    | -0.04060 | 0.00063  | 0.00517  | -0.01813 | 0.06619  |
| CZ9                    | -0.11568 | 0.00543  | 0.00003  | 0.00772  | -0.06590 |
| HX10                   | 0.05614  | -0.00261 | 0.00119  | -0.05748 | 0.24516  |
| HY10                   | -0.05480 | 0.01416  | -0.04181 | 0.05041  | -0.20003 |
| HZ10                   | -0.12152 | 0.02402  | -0.06682 | 0.03074  | -0.13666 |
| HX11                   | 0.05531  | 0.00991  | -0.04447 | -0.04399 | 0.17241  |
| HY11                   | -0.05858 | 0.00193  | 0.00345  | 0.06394  | -0.26937 |
| HZ11                   | -0.12573 | -0.01136 | 0.06293  | 0.03444  | -0.15346 |
| HX12                   | 0.03945  | 0.00906  | -0.03549 | 0.03611  | -0.13582 |
| HY12                   | -0.03878 | 0.01119  | -0.03014 | -0.03505 | 0.13238  |
| HZ12                   | -0.09245 | 0.00520  | -0.00194 | -0.12952 | 0.49067  |
| HX13                   | -0.02903 | 0.12920  | 0.03907  | 0.05578  | 0.04746  |
| HY13                   | 0.03753  | 0.10715  | 0.03446  | -0.07601 | -0.05382 |
| HZ13                   | 0.10977  | -0.00023 | 0.00172  | 0.26873  | -0.01238 |
| HX14                   | -0.04676 | 0.02340  | 0.02439  | -0.07236 | -0.14074 |
| HY14                   | 0.05371  | 0.01617  | 0.02166  | 0.08425  | 0.15760  |
| HZ14                   | 0.16228  | -0.00587 | 0.00226  | -0.09848 | 0.09405  |
| HX15                   | -0.06802 | -0.25742 | 0.59815  | -0.04989 | 0.05418  |
| HY15                   | 0.04971  | -0.22500 | 0.51080  | 0.04964  | -0.06541 |
| HZ15                   | 0.05206  | -0.01164 | 0.01997  | 0.22819  | 0.12916  |
| OX16                   | 0.00011  | -0.00022 | 0.00033  | 0.00001  | -0.00008 |
| OY16                   | 0.00019  | -0.00030 | 0.00010  | 0.00007  | -0.00000 |
| OZ16                   | 0.00013  | -0.00010 | 0.00018  | -0.00003 | 0.00001  |
| OX17                   | 0.00005  | -0.00061 | 0.00101  | -0.00004 | 0.00013  |
| OY17                   | -0.00001 | -0.00030 | 0.00090  | -0.00006 | 0.00007  |
| OZ17                   | -0.00000 | 0.00003  | -0.00008 | -0.00002 | 0.00003  |

|                    | 21 A    | 22 A    | 23 A    | 24 A    | 25 A    |
|--------------------|---------|---------|---------|---------|---------|
| Wavenumbers [cm-1] | 1145.21 | 1230.83 | 1287.65 | 1305.00 | 1370.32 |

|                        |          |          |          |          |          |
|------------------------|----------|----------|----------|----------|----------|
| Intensities [km/mol]   | 0.89     | 52.38    | 94.36    | 103.93   | 153.24   |
| Intensities [relative] | 0.08     | 4.78     | 8.62     | 9.49     | 13.99    |
| CX1                    | -0.00700 | 0.06417  | -0.00453 | -0.00974 | 0.00153  |
| CY1                    | -0.00685 | -0.07278 | 0.00089  | 0.01170  | 0.00015  |
| CZ1                    | -0.00072 | -0.04506 | 0.08372  | 0.00864  | -0.05369 |
| NX2                    | -0.00448 | -0.04312 | 0.02171  | 0.01598  | -0.01752 |
| NY2                    | -0.00285 | 0.04934  | -0.02077 | -0.01783 | 0.01829  |
| NZ2                    | 0.00026  | 0.02391  | -0.09438 | -0.01868 | 0.04519  |
| CX3                    | 0.00351  | -0.00238 | 0.01765  | -0.02872 | 0.03919  |
| CY3                    | 0.00267  | 0.00271  | -0.02196 | 0.03406  | -0.04782 |
| CZ3                    | 0.00021  | -0.00407 | 0.03840  | -0.01552 | 0.05000  |
| NX4                    | -0.00058 | 0.05550  | 0.01730  | 0.02368  | 0.00205  |
| NY4                    | -0.00111 | -0.06263 | -0.01641 | -0.02666 | 0.00172  |
| NZ4                    | -0.00046 | -0.03858 | -0.07836 | -0.01608 | -0.07961 |
| CX5                    | -0.00632 | -0.08208 | -0.06055 | 0.03907  | -0.04966 |
| CY5                    | -0.00396 | 0.09846  | 0.07327  | -0.05508 | 0.05122  |
| CZ5                    | -0.00061 | -0.03574 | -0.04034 | 0.16072  | 0.13188  |
| CX6                    | 0.06734  | -0.04888 | -0.03534 | -0.06071 | 0.03742  |
| CY6                    | 0.05884  | 0.05496  | 0.03557  | 0.06646  | -0.03897 |
| CZ6                    | 0.00292  | 0.00805  | 0.09714  | 0.09053  | -0.09250 |
| OX7                    | -0.00065 | -0.00149 | -0.01512 | 0.00436  | 0.00737  |
| OY7                    | -0.00070 | 0.00038  | 0.01609  | -0.00496 | -0.00775 |
| OZ7                    | 0.00010  | 0.02918  | 0.02675  | -0.00308 | -0.01459 |
| SX8                    | 0.00074  | 0.01104  | 0.00738  | -0.01188 | -0.00247 |
| SY8                    | 0.00037  | -0.01415 | -0.00965 | 0.01565  | 0.00337  |
| SZ8                    | 0.00030  | 0.02073  | 0.01829  | -0.03017 | -0.00922 |
| CX9                    | -0.09508 | 0.04087  | 0.01236  | 0.03114  | -0.00229 |
| CY9                    | -0.08300 | -0.04674 | -0.01179 | -0.03410 | 0.00113  |
| CZ9                    | -0.00480 | 0.01540  | -0.04640 | -0.03807 | 0.03019  |
| HX10                   | -0.03726 | -0.10836 | 0.04162  | -0.01103 | -0.05469 |
| HY10                   | 0.25608  | 0.06365  | -0.05020 | -0.01406 | 0.06402  |
| HZ10                   | 0.49967  | 0.01710  | -0.07570 | -0.05310 | 0.07120  |
| HX11                   | 0.27229  | -0.05238 | 0.04770  | 0.01876  | -0.05974 |
| HY11                   | -0.04138 | 0.11715  | -0.04552 | 0.01091  | 0.06113  |
| HZ11                   | -0.47923 | 0.03364  | -0.07593 | -0.04992 | 0.07284  |
| HX12                   | 0.20566  | 0.08020  | 0.01858  | 0.05075  | -0.01315 |
| HY12                   | 0.16860  | -0.08300 | -0.01737 | -0.05052 | 0.00954  |
| HZ12                   | 0.00281  | -0.26428 | -0.06197 | -0.14668 | 0.07423  |
| HX13                   | 0.00575  | 0.05849  | 0.01721  | 0.02667  | 0.00216  |
| HY13                   | 0.00426  | -0.06871 | -0.01634 | -0.01202 | 0.01544  |
| HZ13                   | 0.00013  | 0.03290  | -0.08231 | -0.39038 | -0.39509 |
| HX14                   | -0.01299 | -0.21923 | 0.20189  | 0.00628  | 0.02137  |
| HY14                   | -0.00852 | 0.24551  | -0.22482 | -0.00669 | -0.02544 |
| HZ14                   | 0.00053  | 0.17091  | -0.25133 | -0.01062 | 0.01690  |
| HX15                   | 0.07993  | 0.07748  | -0.02575 | 0.01210  | -0.03150 |
| HY15                   | 0.06743  | -0.08192 | 0.01703  | -0.00303 | 0.02162  |
| HZ15                   | 0.00165  | -0.17595 | 0.36250  | -0.31688 | 0.37836  |
| OX16                   | -0.00045 | -0.00004 | 0.00010  | -0.00000 | -0.00012 |
| OY16                   | -0.00029 | -0.00019 | -0.00002 | 0.00022  | 0.00004  |
| OZ16                   | -0.00005 | -0.00000 | 0.00013  | -0.00031 | -0.00012 |
| OX17                   | -0.00011 | 0.00013  | -0.00003 | -0.00006 | 0.00011  |
| OY17                   | -0.00017 | 0.00018  | 0.00002  | -0.00021 | -0.00001 |
| OZ17                   | 0.00017  | -0.00005 | -0.00016 | 0.00035  | 0.00010  |
| Wavenumbers [cm-1]     | 26 A     | 27 A     | 28 A     | 29 A     | 30 A     |
| Intensities [km/mol]   | 1498.55  | 1535.71  | 1562.45  | 1603.57  | 1604.42  |
| Intensities [relative] | 15.46    | 157.62   | 3.83     | 2.28     | 3.58     |
|                        | 1.41     | 14.39    | 0.35     | 0.21     | 0.33     |
| CX1                    | 0.03090  | 0.00476  | -0.00083 | -0.00053 | -0.00065 |
| CY1                    | -0.03553 | -0.00658 | 0.00045  | 0.00089  | 0.00054  |
| CZ1                    | -0.00478 | 0.01690  | 0.01197  | 0.00097  | -0.00026 |
| NX2                    | 0.03245  | 0.03203  | 0.00752  | 0.00184  | 0.00158  |
| NY2                    | -0.03796 | -0.03909 | -0.00797 | -0.00206 | -0.00168 |
| NZ2                    | 0.00360  | 0.03897  | -0.01621 | -0.00158 | -0.00094 |
| CX3                    | -0.01914 | -0.11615 | 0.00299  | -0.00062 | -0.00040 |
| CY3                    | 0.02310  | 0.13995  | -0.00324 | 0.00026  | 0.00019  |
| CZ3                    | -0.02338 | -0.10366 | -0.00466 | -0.00007 | -0.00098 |
| NX4                    | -0.01163 | 0.04843  | 0.00065  | 0.00039  | 0.00029  |
| NY4                    | 0.01069  | -0.05743 | -0.00018 | -0.00036 | -0.00011 |
| NZ4                    | 0.05778  | 0.02284  | -0.01212 | 0.00404  | -0.00041 |
| CX5                    | 0.05846  | -0.05413 | 0.00464  | -0.00068 | 0.00058  |



|      |          |          |          |          |          |
|------|----------|----------|----------|----------|----------|
| CY5  | -0.06761 | 0.06143  | -0.00535 | 0.00199  | 0.00076  |
| CZ5  | -0.02689 | 0.03544  | -0.00263 | -0.00187 | 0.00023  |
| CX6  | -0.09738 | 0.02524  | -0.01373 | -0.00673 | -0.00955 |
| CY6  | 0.11660  | -0.02698 | 0.01497  | -0.00615 | -0.00779 |
| CZ6  | -0.06193 | -0.05306 | 0.01967  | -0.00134 | -0.00039 |
| OX7  | -0.00034 | 0.01551  | -0.00533 | -0.00004 | -0.00043 |
| OY7  | 0.00059  | -0.01852 | 0.00561  | 0.00014  | 0.00050  |
| OZ7  | -0.00372 | 0.01008  | 0.01155  | -0.00058 | 0.00105  |
| SX8  | -0.00151 | 0.00264  | -0.00005 | 0.00014  | 0.00001  |
| SY8  | 0.00194  | -0.00301 | 0.00002  | -0.00019 | -0.00003 |
| SZ8  | -0.00280 | -0.00146 | 0.00065  | 0.00015  | 0.00001  |
| CX9  | 0.02628  | -0.00047 | 0.04750  | -0.02602 | -0.03204 |
| CY9  | -0.03148 | -0.00045 | -0.04768 | -0.01926 | -0.02728 |
| CZ9  | 0.01990  | 0.01278  | -0.11249 | -0.00173 | -0.00325 |
| HX10 | -0.15112 | -0.03029 | -0.05831 | 0.22805  | 0.28027  |
| HY10 | 0.04946  | 0.03326  | 0.35925  | -0.20324 | -0.25983 |
| HZ10 | -0.04717 | 0.02877  | 0.35963  | -0.02289 | -0.03947 |
| HX11 | -0.01997 | -0.02969 | -0.36566 | -0.16766 | -0.22117 |
| HY11 | 0.15770  | 0.03466  | 0.09227  | 0.22254  | 0.30860  |
| HZ11 | -0.03697 | 0.02812  | 0.34280  | 0.05098  | 0.05917  |
| HX12 | 0.03219  | -0.00623 | -0.05816 | 0.32521  | 0.42223  |
| HY12 | -0.03854 | 0.00536  | 0.02721  | 0.27244  | 0.35636  |
| HZ12 | -0.06640 | 0.04156  | 0.47942  | 0.00389  | 0.02445  |
| HX13 | -0.01123 | 0.05207  | 0.00023  | 0.00001  | -0.00018 |
| HY13 | 0.01659  | -0.06326 | -0.00389 | 0.00040  | -0.00066 |
| HZ13 | -0.06260 | 0.08648  | 0.07247  | -0.02239 | 0.00276  |
| HX14 | -0.06572 | 0.23392  | -0.03288 | -0.00643 | -0.00439 |
| HY14 | 0.07266  | -0.26408 | 0.03702  | 0.01020  | 0.00733  |
| HZ14 | 0.08949  | -0.12486 | 0.01629  | 0.00662  | 0.00512  |
| HX15 | -0.01044 | 0.00759  | 0.00304  | 0.00111  | 0.00205  |
| HY15 | -0.01103 | -0.01132 | -0.00237 | 0.00257  | 0.00365  |
| HZ15 | 0.57474  | 0.05864  | -0.03002 | 0.00232  | 0.00514  |
| OX16 | 0.00015  | 0.00013  | 0.00050  | 0.03901  | -0.02991 |
| OY16 | -0.00001 | -0.00009 | -0.00060 | -0.05046 | 0.03877  |
| OZ16 | 0.00015  | 0.00026  | 0.00151  | 0.12477  | -0.09583 |
| OX17 | -0.00010 | -0.00002 | -0.00044 | -0.03919 | -0.03010 |
| OY17 | 0.00006  | 0.00021  | 0.00064  | 0.05032  | -0.03861 |
| OZ17 | -0.00010 | -0.00024 | -0.00154 | -0.12476 | 0.09582  |

|                                 | 31 A     | 32 A     | 33 A     | 34 A     | 35 A     |
|---------------------------------|----------|----------|----------|----------|----------|
| Wavenumbers [cm <sup>-1</sup> ] | 1613.91  | 1626.40  | 1643.01  | 1800.79  | 2000.34  |
| Intensities [km/mol]            | 45.87    | 28.83    | 95.99    | 203.77   | 1095.07  |
| Intensities [relative]          | 4.19     | 2.63     | 8.77     | 18.61    | 100.00   |
| CX1                             | 0.02872  | -0.02317 | -0.03204 | 0.02249  | -0.00159 |
| CY1                             | -0.03166 | 0.02463  | 0.03836  | -0.03435 | 0.00181  |
| CZ1                             | -0.04263 | 0.05446  | -0.01740 | 0.18465  | 0.00379  |
| NX2                             | -0.06167 | 0.03420  | 0.05720  | -0.00982 | 0.02402  |
| NY2                             | 0.06904  | -0.03750 | -0.06497 | 0.01344  | -0.02656 |
| NZ2                             | 0.05603  | -0.04586 | -0.03302 | -0.03902 | -0.02948 |
| CX3                             | 0.00987  | 0.00413  | 0.00089  | 0.02176  | -0.08601 |
| CY3                             | -0.01164 | -0.00478 | 0.00142  | -0.02595 | 0.09018  |
| CZ3                             | 0.01408  | -0.00465 | -0.04926 | 0.01695  | 0.19271  |
| NX4                             | -0.00909 | 0.00484  | 0.00675  | -0.00727 | 0.00644  |
| NY4                             | 0.01450  | -0.00631 | -0.00233 | 0.01013  | -0.00558 |
| NZ4                             | -0.07767 | 0.01341  | -0.10961 | -0.03252 | -0.03728 |
| CX5                             | 0.04001  | -0.02611 | 0.01025  | 0.00729  | -0.00073 |
| CY5                             | -0.04904 | 0.03116  | -0.01678 | -0.01072 | 0.00076  |
| CZ5                             | 0.03975  | -0.00702 | 0.08638  | 0.03693  | 0.00068  |
| CX6                             | -0.02513 | 0.03432  | 0.01060  | -0.03006 | 0.00042  |
| CY6                             | 0.02713  | -0.04021 | -0.01156 | 0.04232  | -0.00041 |
| CZ6                             | 0.02489  | -0.01218 | -0.00301 | -0.16533 | -0.00077 |
| OX7                             | 0.00933  | -0.01019 | -0.02564 | -0.00559 | 0.04531  |
| OY7                             | -0.01063 | 0.01115  | 0.02624  | 0.00620  | -0.04719 |
| OZ7                             | -0.00451 | 0.01350  | 0.07010  | 0.00544  | -0.10766 |
| SX8                             | -0.00391 | 0.00160  | -0.00327 | 0.00008  | 0.00016  |
| SY8                             | 0.00483  | -0.00200 | 0.00419  | -0.00001 | -0.00024 |
| SZ8                             | -0.00456 | 0.00212  | -0.00640 | -0.00131 | 0.00092  |
| CX9                             | 0.01978  | 0.01768  | -0.00807 | -0.00431 | 0.00011  |
| CY9                             | -0.02665 | -0.02406 | 0.00921  | 0.00350  | -0.00015 |
| CZ9                             | 0.00592  | 0.02128  | 0.00956  | 0.02517  | -0.00025 |
| HX10                            | -0.21578 | -0.39083 | 0.05882  | 0.02350  | 0.00034  |

|      |          |          |          |          |          |
|------|----------|----------|----------|----------|----------|
| HY10 | -0.00101 | 0.00967  | -0.04030 | 0.01348  | 0.00281  |
| HZ10 | -0.19499 | -0.34579 | 0.00998  | 0.06852  | 0.00345  |
| HX11 | 0.02920  | 0.07224  | 0.03310  | -0.02288 | -0.00289 |
| HY11 | 0.25359  | 0.41847  | -0.07056 | -0.02365 | -0.00022 |
| HZ11 | -0.17354 | -0.31896 | 0.00657  | 0.06647  | 0.00291  |
| HX12 | 0.01021  | -0.04058 | 0.00820  | 0.01406  | 0.00076  |
| HY12 | 0.01678  | 0.03830  | -0.00922 | -0.00950 | -0.00104 |
| HZ12 | 0.16418  | 0.37466  | -0.10118 | -0.08860 | 0.00029  |
| HX13 | -0.01176 | 0.00538  | 0.00441  | -0.00899 | 0.00509  |
| HY13 | -0.00911 | 0.00078  | -0.03008 | 0.00581  | -0.01474 |
| HZ13 | 0.44319  | -0.13569 | 0.50480  | 0.08728  | 0.17609  |
| HX14 | 0.24564  | -0.14971 | -0.21065 | 0.03879  | -0.10364 |
| HY14 | -0.27657 | 0.16938  | 0.23588  | -0.04215 | 0.11701  |
| HZ14 | -0.19924 | 0.10533  | 0.19356  | -0.08616 | 0.07935  |
| HX15 | 0.03039  | -0.01030 | -0.05178 | 0.07197  | -0.00129 |
| HY15 | -0.03424 | 0.01714  | 0.05373  | -0.07168 | 0.00105  |
| HZ15 | -0.02300 | -0.12920 | 0.14567  | -0.27078 | 0.00784  |
| OX16 | 0.00138  | 0.00053  | 0.00063  | 0.00001  | -0.00000 |
| OY16 | -0.00187 | -0.00061 | -0.00077 | 0.00022  | 0.00003  |
| OZ16 | 0.00447  | 0.00158  | 0.00203  | -0.00020 | -0.00002 |
| OX17 | -0.00144 | -0.00050 | -0.00069 | 0.00016  | 0.00002  |
| OY17 | 0.00182  | 0.00060  | 0.00076  | -0.00008 | -0.00003 |
| OZ17 | -0.00447 | -0.00154 | -0.00201 | 0.00023  | 0.00003  |

|                        | 36 A     | 37 A     | 38 A     | 39 A     | 40 A     |
|------------------------|----------|----------|----------|----------|----------|
| Wavenumbers [cm-1]     | 3202.30  | 3273.72  | 3278.93  | 3398.48  | 3870.15  |
| Intensities [km/mol]   | 24.11    | 20.33    | 17.32    | 7.80     | 73.04    |
| Intensities [relative] | 2.20     | 1.86     | 1.58     | 0.71     | 6.67     |
| CX1                    | -0.00078 | -0.00127 | 0.00038  | 0.05413  | 0.00004  |
| CY1                    | 0.00084  | 0.00143  | -0.00072 | -0.06369 | -0.00003 |
| CZ1                    | 0.00038  | -0.00033 | 0.00018  | 0.01041  | -0.00027 |
| NX2                    | 0.00016  | -0.00011 | 0.00003  | -0.00085 | -0.00028 |
| NY2                    | -0.00015 | 0.00010  | -0.00009 | 0.00097  | 0.00030  |
| NZ2                    | -0.00034 | -0.00009 | 0.00002  | 0.00048  | 0.00028  |
| CX3                    | -0.00027 | 0.00012  | -0.00010 | -0.00092 | -0.00046 |
| CY3                    | 0.00031  | -0.00017 | 0.00007  | 0.00106  | 0.00058  |
| CZ3                    | 0.00014  | 0.00024  | -0.00010 | 0.00024  | -0.00088 |
| NX4                    | 0.00012  | -0.00008 | -0.00001 | 0.00000  | 0.04629  |
| NY4                    | -0.00015 | 0.00008  | -0.00007 | -0.00002 | -0.05393 |
| NZ4                    | 0.00019  | -0.00032 | 0.00015  | 0.00023  | -0.00183 |
| CX5                    | -0.00038 | 0.00006  | 0.00004  | -0.00026 | -0.00042 |
| CY5                    | 0.00047  | -0.00005 | 0.00010  | 0.00032  | 0.00045  |
| CZ5                    | -0.00053 | 0.00076  | -0.00035 | -0.00032 | 0.00064  |
| CX6                    | -0.00030 | 0.00000  | -0.00020 | -0.00110 | -0.00027 |
| CY6                    | 0.00023  | -0.00018 | -0.00008 | 0.00141  | 0.00031  |
| CZ6                    | 0.00156  | 0.00084  | -0.00039 | -0.00420 | 0.00032  |
| OX7                    | 0.00007  | -0.00001 | 0.00002  | 0.00020  | 0.00010  |
| OY7                    | -0.00007 | 0.00002  | -0.00001 | -0.00022 | -0.00011 |
| OZ7                    | -0.00011 | -0.00005 | 0.00002  | -0.00020 | -0.00011 |
| SX8                    | -0.00002 | 0.00004  | 0.00003  | 0.00001  | 0.00001  |
| SY8                    | 0.00001  | -0.00000 | 0.00005  | -0.00001 | -0.00001 |
| SZ8                    | 0.00009  | -0.00011 | 0.00005  | 0.00004  | 0.00002  |
| CX9                    | 0.02423  | 0.01407  | -0.07969 | 0.00137  | -0.00001 |
| CY9                    | -0.02259 | -0.07578 | -0.02924 | -0.00171 | 0.00001  |
| CZ9                    | -0.03759 | 0.04386  | -0.02498 | 0.00073  | 0.00001  |
| HX10                   | -0.26641 | 0.33948  | 0.19515  | 0.00124  | 0.00017  |
| HY10                   | -0.38792 | 0.46696  | 0.29851  | 0.00307  | 0.00000  |
| HZ10                   | 0.27181  | -0.33735 | -0.22416 | -0.00080 | -0.00012 |
| HX11                   | 0.38302  | -0.08979 | 0.59266  | -0.00294 | -0.00001 |
| HY11                   | 0.16954  | -0.05798 | 0.26816  | -0.00046 | -0.00016 |
| HZ11                   | 0.29137  | -0.06252 | 0.47028  | -0.00080 | -0.00013 |
| HX12                   | -0.39745 | -0.41678 | 0.16459  | -0.01610 | -0.00043 |
| HY12                   | 0.48067  | 0.49456  | -0.21665 | 0.01935  | 0.00052  |
| HZ12                   | -0.13146 | -0.13109 | 0.05442  | -0.00390 | -0.00005 |
| HX13                   | 0.00032  | 0.00029  | -0.00017 | -0.00004 | -0.62496 |
| HY13                   | -0.00035 | -0.00040 | 0.00011  | 0.00003  | 0.72820  |
| HZ13                   | -0.00067 | 0.00027  | -0.00013 | 0.00022  | 0.03067  |
| HX14                   | -0.00005 | -0.00022 | -0.00004 | 0.00630  | -0.00241 |
| HY14                   | 0.00015  | 0.00019  | -0.00016 | -0.00757 | 0.00315  |
| HZ14                   | -0.00149 | -0.00058 | 0.00018  | 0.00291  | -0.00578 |
| HX15                   | 0.00847  | 0.01332  | -0.00526 | -0.61422 | 0.00002  |

|      |          |          |          |          |          |
|------|----------|----------|----------|----------|----------|
| HY15 | -0.00993 | -0.01545 | 0.00664  | 0.72221  | -0.00003 |
| HZ15 | 0.00036  | 0.00078  | -0.00030 | -0.08707 | 0.00009  |
| OX16 | -0.00003 | 0.00002  | -0.00006 | 0.00001  | -0.00000 |
| OY16 | -0.00001 | 0.00000  | -0.00001 | 0.00000  | -0.00000 |
| OZ16 | 0.00004  | -0.00000 | 0.00005  | -0.00001 | 0.00000  |
| OX17 | 0.00001  | 0.00000  | 0.00002  | -0.00002 | 0.00000  |
| OY17 | 0.00001  | 0.00000  | 0.00000  | 0.00000  | -0.00000 |
| OZ17 | -0.00001 | -0.00001 | 0.00000  | 0.00000  | -0.00000 |

41 A  
Wavenumbers [cm-1] 3911.03  
Intensities [km/mol] 145.43  
Intensities [relative] 13.28

|      |          |
|------|----------|
| CX1  | -0.00063 |
| CY1  | 0.00066  |
| CZ1  | 0.00197  |
| NX2  | -0.02088 |
| NY2  | 0.02793  |
| NZ2  | -0.06247 |
| CX3  | 0.00078  |
| CY3  | -0.00087 |
| CZ3  | -0.00022 |
| NX4  | 0.00053  |
| NY4  | -0.00064 |
| NZ4  | 0.00050  |
| CX5  | -0.00013 |
| CY5  | 0.00016  |
| CZ5  | -0.00024 |
| CX6  | 0.00007  |
| CY6  | -0.00010 |
| CZ6  | 0.00062  |
| OX7  | 0.00004  |
| OY7  | -0.00004 |
| OZ7  | -0.00020 |
| SX8  | 0.00002  |
| SY8  | -0.00003 |
| SZ8  | 0.00005  |
| CX9  | 0.00005  |
| CY9  | -0.00007 |
| CZ9  | -0.00004 |
| HX10 | -0.00019 |
| HY10 | -0.00016 |
| HZ10 | 0.00031  |
| HX11 | 0.00022  |
| HY11 | 0.00015  |
| HZ11 | 0.00034  |
| HX12 | -0.00055 |
| HY12 | 0.00066  |
| HZ12 | -0.00012 |
| HX13 | -0.00405 |
| HY13 | 0.00468  |
| HZ13 | 0.00051  |
| HX14 | 0.27973  |
| HY14 | -0.37511 |
| HZ14 | 0.83776  |
| HX15 | 0.00456  |
| HY15 | -0.00533 |
| HZ15 | -0.00103 |
| OX16 | 0.00000  |
| OY16 | 0.00000  |
| OZ16 | -0.00000 |
| OX17 | -0.00000 |
| OY17 | 0.00000  |
| OZ17 | 0.00000  |

Normal Modes of imaginary frequencies

|                      |        |        |
|----------------------|--------|--------|
|                      | 1      | 2      |
| Wavenumbers [cm-1]   | 160.76 | 100.69 |
| Intensities [km/mol] | 0.02   | 0.09   |

| Intensities [relative] | 0.00     | 0.01     |
|------------------------|----------|----------|
| CX1                    | 0.00325  | 0.00123  |
| CY1                    | -0.00153 | 0.00060  |
| CZ1                    | -0.00759 | -0.00254 |
| NX2                    | 0.00938  | 0.00015  |
| NY2                    | -0.00426 | 0.00001  |
| NZ2                    | -0.00404 | -0.00213 |
| CX3                    | 0.00724  | 0.00691  |
| CY3                    | -0.00661 | 0.00575  |
| CZ3                    | 0.00266  | -0.00140 |
| NX4                    | 0.00101  | 0.00295  |
| NY4                    | -0.00386 | 0.00323  |
| NZ4                    | 0.00553  | -0.00119 |
| CX5                    | -0.00310 | -0.00323 |
| CY5                    | 0.00085  | -0.00097 |
| CZ5                    | 0.00258  | -0.00169 |
| CX6                    | -0.00230 | 0.00382  |
| CY6                    | 0.00131  | 0.00420  |
| CZ6                    | -0.00483 | -0.00200 |
| OX7                    | 0.01073  | 0.01435  |
| OY7                    | -0.01006 | 0.01167  |
| OZ7                    | 0.00560  | -0.00085 |
| SX8                    | -0.00810 | -0.01931 |
| SY8                    | 0.00563  | -0.01327 |
| SZ8                    | 0.00713  | -0.00158 |
| CX9                    | -0.00339 | 0.00641  |
| CY9                    | 0.00897  | 0.00905  |
| CZ9                    | -0.00868 | -0.00289 |
| HX10                   | -0.00080 | 0.00763  |
| HY10                   | 0.01178  | 0.01169  |
| HZ10                   | -0.00246 | 0.00178  |
| HX11                   | -0.00351 | 0.00824  |
| HY11                   | 0.01559  | 0.01158  |
| HZ11                   | -0.01191 | -0.00613 |
| HX12                   | -0.00561 | 0.00637  |
| HY12                   | 0.00573  | 0.00856  |
| HZ12                   | -0.01414 | -0.00464 |
| HX13                   | 0.00084  | 0.00197  |
| HY13                   | -0.00424 | 0.00236  |
| HZ13                   | 0.01054  | -0.00056 |
| HX14                   | 0.01139  | 0.00599  |
| HY14                   | -0.00828 | 0.00491  |
| HZ14                   | -0.00645 | -0.00188 |
| HX15                   | 0.00514  | 0.00366  |
| HY15                   | -0.00066 | 0.00251  |
| HZ15                   | -0.01283 | -0.00273 |
| OX16                   | 0.09801  | 0.13766  |
| OY16                   | -0.11800 | 0.10933  |
| OZ16                   | -0.08315 | 0.01106  |
| OX17                   | -0.10335 | -0.12952 |
| OY17                   | 0.12040  | -0.11385 |
| OZ17                   | 0.07622  | 0.00466  |

Normal Modes of low/zero frequencies

|                        | 1        | 2        | 3        | 4        | 5        |
|------------------------|----------|----------|----------|----------|----------|
| Wavenumbers [cm-1]     | 0.00     | 0.00     | 0.00     | 0.00     | 0.00     |
| Intensities [km/mol]   | 0.00     | 0.00     | 0.00     | 0.00     | 0.00     |
| Intensities [relative] | 0.00     | 0.00     | 0.00     | 0.00     | 0.00     |
| CX1                    | 0.07001  | -0.00146 | -0.01104 | 0.04028  | -0.00937 |
| CY1                    | 0.04494  | -0.01701 | 0.08265  | 0.00613  | -0.01096 |
| CZ1                    | -0.04391 | -0.01961 | 0.04603  | 0.01538  | 0.02372  |
| NX2                    | 0.09457  | 0.01085  | -0.03436 | -0.00026 | -0.01043 |
| NY2                    | 0.04608  | -0.04517 | 0.07824  | -0.01156 | 0.02200  |
| NZ2                    | -0.03446 | -0.00258 | 0.03848  | 0.00654  | 0.00919  |
| CX3                    | 0.08530  | 0.02803  | -0.05257 | -0.01935 | 0.02116  |
| CY3                    | 0.03702  | -0.03233 | 0.06331  | -0.02717 | 0.05108  |
| CZ3                    | -0.01751 | 0.03138  | 0.02430  | -0.00906 | -0.01882 |
| NX4                    | 0.04934  | 0.03214  | -0.04583 | 0.00513  | 0.05436  |
| NY4                    | 0.02669  | 0.01101  | 0.05308  | -0.02372 | 0.04467  |

|      |          |          |          |          |          |
|------|----------|----------|----------|----------|----------|
| NZ4  | -0.01075 | 0.04739  | 0.01819  | -0.01509 | -0.03141 |
| CX5  | 0.02258  | 0.02111  | -0.02338 | 0.04555  | 0.05893  |
| CY5  | 0.02462  | 0.04176  | 0.05625  | -0.00670 | 0.01296  |
| CZ5  | -0.01908 | 0.03322  | 0.02469  | -0.00723 | -0.01910 |
| CX6  | 0.03482  | 0.00266  | -0.00458 | 0.06408  | 0.02327  |
| CY6  | 0.03471  | 0.02554  | 0.07243  | 0.00927  | -0.01680 |
| CZ6  | -0.03702 | -0.00373 | 0.03988  | 0.00920  | 0.01113  |
| OX7  | 0.10626  | 0.03872  | -0.07268 | -0.05423 | 0.02050  |
| OY7  | 0.03785  | -0.05623 | 0.05929  | -0.04257 | 0.07977  |
| OZ7  | -0.00910 | 0.04625  | 0.01764  | -0.01695 | -0.03159 |
| SX8  | -0.01918 | 0.02879  | -0.01915 | 0.06941  | 0.10163  |
| SY8  | 0.01164  | 0.09211  | 0.04245  | -0.00537 | 0.01050  |
| SZ8  | -0.00892 | 0.05712  | 0.01554  | -0.01631 | -0.03793 |
| CX9  | 0.00850  | -0.01076 | 0.02068  | 0.10789  | 0.02409  |
| CY9  | 0.03376  | 0.05542  | 0.07762  | 0.02875  | -0.05309 |
| CZ9  | -0.04778 | -0.02245 | 0.04835  | 0.01932  | 0.02728  |
| HX10 | -0.01347 | -0.00003 | 0.01462  | 0.10988  | 0.05612  |
| HY10 | 0.03651  | 0.06341  | 0.08497  | 0.04230  | -0.07832 |
| HZ10 | -0.06520 | -0.00123 | 0.05251  | 0.03967  | 0.02382  |
| HX11 | -0.00357 | -0.01888 | 0.03470  | 0.13107  | 0.02166  |
| HY11 | 0.02204  | 0.08784  | 0.06205  | 0.02026  | -0.03727 |
| HZ11 | -0.02589 | -0.03095 | 0.03975  | -0.00485 | 0.02121  |
| HX12 | 0.02233  | -0.02364 | 0.03207  | 0.11628  | -0.00482 |
| HY12 | 0.04200  | 0.03792  | 0.08982  | 0.03864  | -0.07152 |
| HZ12 | -0.06053 | -0.04944 | 0.05928  | 0.03094  | 0.04919  |
| HX13 | 0.04228  | 0.04476  | -0.05912 | -0.00867 | 0.07774  |
| HY13 | 0.02004  | 0.02064  | 0.04217  | -0.03503 | 0.06573  |
| HZ13 | 0.00156  | 0.07236  | 0.00784  | -0.02640 | -0.05194 |
| HX14 | 0.12046  | 0.00739  | -0.03858 | -0.01709 | -0.03506 |
| HY14 | 0.05362  | -0.07627 | 0.08582  | -0.01370 | 0.02598  |
| HZ14 | -0.03955 | -0.01502 | 0.04315  | 0.01105  | 0.01889  |
| HX15 | 0.08107  | -0.01459 | 0.00156  | 0.05144  | -0.03652 |
| HY15 | 0.05276  | -0.03146 | 0.09473  | 0.01709  | -0.03138 |
| HZ15 | -0.05702 | -0.04646 | 0.05709  | 0.02739  | 0.04571  |
| OX16 | 0.05348  | -0.03002 | 0.02972  | 0.09951  | -0.03760 |
| OY16 | 0.01036  | 0.06551  | 0.03360  | -0.02863 | 0.05382  |
| OZ16 | 0.03011  | -0.05571 | 0.01832  | -0.06692 | 0.00739  |
| OX17 | 0.08507  | -0.03372 | 0.02392  | 0.07815  | -0.06690 |
| OY17 | 0.01955  | 0.02731  | 0.04277  | -0.03145 | 0.05907  |
| OZ17 | 0.02392  | -0.06997 | 0.02384  | -0.06137 | 0.01869  |

|                        | 6        | 7        | 8        |
|------------------------|----------|----------|----------|
| Wavenumbers [cm-1]     | 0.00     | 16.36    | 30.00    |
| Intensities [km/mol]   | 0.00     | 0.00     | 0.00     |
| Intensities [relative] | 0.00     | 0.00     | 0.00     |
| CX1                    | 0.02708  | 0.05940  | -0.02251 |
| CY1                    | -0.02183 | 0.01657  | -0.01408 |
| CZ1                    | 0.06604  | -0.01100 | -0.04124 |
| NX2                    | 0.03120  | 0.03654  | -0.02795 |
| NY2                    | -0.01701 | -0.00615 | -0.03142 |
| NZ2                    | 0.06564  | -0.01050 | -0.03597 |
| CX3                    | 0.03375  | -0.01256 | -0.02750 |
| CY3                    | -0.01474 | -0.04879 | -0.03173 |
| CZ3                    | 0.06466  | -0.00972 | -0.02496 |
| NX4                    | 0.03188  | -0.02575 | -0.00714 |
| NY4                    | -0.01766 | -0.05671 | -0.00090 |
| NZ4                    | 0.06406  | -0.00896 | -0.01885 |
| CX5                    | 0.02784  | 0.00219  | 0.00842  |
| CY5                    | -0.02249 | -0.02883 | 0.02574  |
| CZ5                    | 0.06433  | -0.00901 | -0.02258 |
| CX6                    | 0.02526  | 0.04497  | -0.00843 |
| CY6                    | -0.02466 | 0.00728  | 0.01114  |
| CZ6                    | 0.06546  | -0.01021 | -0.03539 |
| OX7                    | 0.03731  | -0.04166 | -0.04250 |
| OY7                    | -0.01057 | -0.07662 | -0.05567 |
| OZ7                    | 0.06433  | -0.00979 | -0.02082 |
| SX8                    | 0.02621  | -0.01585 | 0.04542  |
| SY8                    | -0.02539 | -0.04004 | 0.07186  |
| SZ8                    | 0.06345  | -0.00751 | -0.01300 |
| CX9                    | 0.02080  | 0.06569  | -0.01141 |
| CY9                    | -0.02990 | 0.02901  | 0.02303  |

|      |          |          |          |
|------|----------|----------|----------|
| CZ9  | 0.06585  | -0.01078 | -0.04170 |
| HX10 | 0.02121  | 0.02926  | -0.00216 |
| HY10 | -0.03288 | 0.05152  | 0.02419  |
| HZ10 | 0.06219  | -0.01509 | -0.03102 |
| HX11 | 0.01839  | 0.07924  | -0.01505 |
| HY11 | -0.03000 | -0.00849 | 0.04025  |
| HZ11 | 0.06894  | -0.00661 | -0.04751 |
| HX12 | 0.01939  | 0.10310  | -0.02133 |
| HY12 | -0.03085 | 0.05993  | 0.01234  |
| HZ12 | 0.06672  | -0.01136 | -0.05159 |
| HX13 | 0.03374  | -0.05856 | -0.00081 |
| HY13 | -0.01603 | -0.08492 | 0.00413  |
| HZ13 | 0.06332  | -0.00809 | -0.01040 |
| HX14 | 0.03245  | 0.04405  | -0.04528 |
| HY14 | -0.01497 | -0.00241 | -0.05557 |
| HZ14 | 0.06613  | -0.01130 | -0.04089 |
| HX15 | 0.02542  | 0.09004  | -0.03300 |
| HY15 | -0.02314 | 0.04247  | -0.02410 |
| HZ15 | 0.06685  | -0.01209 | -0.05035 |
| OX16 | 0.02048  | -0.04016 | 0.02405  |
| OY16 | -0.01960 | 0.11442  | -0.03115 |
| OZ16 | 0.07708  | 0.04340  | 0.11674  |
| OX17 | 0.02211  | -0.03383 | 0.01170  |
| OY17 | -0.01706 | 0.11241  | -0.03954 |
| OZ17 | 0.07760  | 0.04062  | 0.11724  |

6. Frequencies for PS-02 on SS2 (product) state

| Imaginary Vibration | Wavenumber |
|---------------------|------------|
| Nr                  | [1/cm]     |
| 1                   | 160.76     |
| 2                   | 100.69     |

| Low Vibration | Wavenumber |
|---------------|------------|
| Nr            | [1/cm]     |
| 1             | 0.00       |
| 2             | 0.00       |
| 3             | 0.00       |
| 4             | 0.00       |
| 5             | 0.00       |
| 6             | 0.00       |
| 7             | 16.36      |
| 8             | 30.00      |

| Vibration | Wavenumber |
|-----------|------------|
| Nr        | [1/cm]     |
| 1         | 109.67     |
| 2         | 124.24     |
| 3         | 142.70     |
| 4         | 198.30     |
| 5         | 272.79     |
| 6         | 323.04     |
| 7         | 350.49     |
| 8         | 391.68     |
| 9         | 465.64     |
| 10        | 539.52     |
| 11        | 549.11     |
| 12        | 581.50     |
| 13        | 675.05     |
| 14        | 721.18     |
| 15        | 742.60     |
| 16        | 844.58     |
| 17        | 853.55     |
| 18        | 872.03     |
| 19        | 1021.97    |
| 20        | 1102.52    |
| 21        | 1145.21    |
| 22        | 1230.83    |
| 23        | 1287.65    |
| 24        | 1305.00    |
| 25        | 1370.32    |

|    |         |
|----|---------|
| 26 | 1498.55 |
| 27 | 1535.71 |
| 28 | 1562.45 |
| 29 | 1603.57 |
| 30 | 1604.42 |
| 31 | 1613.91 |
| 32 | 1626.40 |
| 33 | 1643.01 |
| 34 | 1800.79 |
| 35 | 2000.34 |
| 36 | 3202.30 |
| 37 | 3273.72 |
| 38 | 3278.93 |
| 39 | 3398.48 |
| 40 | 3870.15 |
| 41 | 3911.03 |

7. Displacement vector (after satisfying Eckart Conditions)

0.00388395  
 -0.439627  
 -0.0942146  
 -2.75172  
 0.440412  
 -0.63253  
 -0.27842  
 -0.225683  
 -0.203802  
 -0.0230315  
 0.241474  
 0.225711  
 -0.00591381  
 0.0507408  
 -0.201204  
 -0.153447  
 -0.198813  
 0.445159  
 -0.0144018  
 0.324341  
 -0.165751  
 -0.149265  
 -0.235925  
 0.273035  
 -0.147082  
 0.404209  
 -0.125863  
 -0.680695  
 0.0588924  
 0.0646134  
 0.126156  
 -0.141349  
 0.0771214  
 0.37645  
 -0.0317917  
 1.76075  
 -0.110988  
 0.211587  
 0.10535  
 -0.00815724  
 -0.00147231  
 -0.178195  
 0.140724  
 2.20556  
 -0.920967

8. Duschinsky rotation matrix (after satisfying Eckart Conditions)

Note that the determinant of the Duschinsky matrix is 0.991402

0.519454 -0.426969 0.650834 0.061326 -0.039179  
 0.128338 -0.185711 -0.421501 0.356382 0.021110

|           |           |           |           |           |
|-----------|-----------|-----------|-----------|-----------|
| -0.765889 | -0.551653 | 0.255345  | 0.094230  | 0.040148  |
| 0.038679  | -0.321354 | -0.398779 | -0.198722 | 0.302838  |
| -0.016576 | 0.090186  | 0.014808  | -0.008996 | -0.032767 |
| -0.180401 | 0.082756  | -0.028184 | -0.023663 | -0.198620 |
| -0.052493 | -0.056536 | -0.109506 | -0.049337 | -0.812113 |
| -0.028774 | 0.029558  | 0.026805  | -0.002414 | 0.329939  |
| -0.008569 | -0.002463 | 0.047525  | -0.087795 | -0.207224 |
| -0.026633 | 0.020443  | 0.054021  | -0.069696 | 0.135064  |
| 0.001503  | 0.000376  | -0.025611 | -0.008589 | 0.004549  |
| -0.041805 | 0.022073  | 0.099837  | 0.069331  | 0.037497  |
| 0.017832  | -0.012057 | -0.005214 | 0.020143  | 0.012933  |
| -0.057988 | -0.018208 | -0.009623 | 0.019548  | 0.005372  |
| -0.030138 | -0.038782 | -0.080120 | 0.026251  | -0.029985 |
| 0.009453  | -0.029733 | -0.042230 | -0.023457 | -0.035906 |
| -0.001884 | -0.024110 | -0.005152 | 0.003633  | -0.011815 |
| 0.021550  | -0.002795 | 0.000556  | -0.012743 | -0.049190 |
| 0.000027  | -0.002612 | 0.005906  | -0.000075 | -0.011134 |
| -0.049804 | 0.013770  | 0.026696  | 0.004403  | -0.003143 |
| -0.023371 | 0.042324  | 0.044298  | 0.004311  | -0.004309 |
| -0.036639 | 0.013367  | 0.014847  | 0.012823  | -0.051173 |
| -0.057362 | 0.017154  | 0.027232  | -0.019985 | 0.077494  |
| -0.038055 | 0.001405  | 0.009934  | 0.002886  | -0.022289 |
| -0.003793 | 0.008687  | 0.011501  | 0.042508  | 0.004341  |
| 0.009699  | -0.012409 | -0.010307 | -0.010294 | 0.014392  |
| 0.009241  | 0.000957  | 0.005083  | -0.042591 | 0.014717  |
| -0.008646 | -0.012559 | 0.006106  | -0.121353 | -0.007209 |
| -0.004634 | -0.010120 | 0.016649  | -0.298559 | -0.005563 |
| -0.010992 | 0.013399  | 0.009648  | 0.004076  | -0.002678 |
| -0.023088 | 0.001523  | 0.011275  | 0.028973  | -0.015270 |
| 0.022370  | -0.007491 | -0.013114 | 0.016772  | -0.052805 |
| -0.015988 | 0.007370  | 0.007626  | -0.006603 | -0.012227 |
| 0.013335  | -0.007223 | -0.008528 | 0.002119  | 0.006747  |
| 0.014139  | -0.006802 | -0.011577 | -0.038243 | 0.012797  |
| 0.000087  | 0.000180  | -0.002237 | -0.003038 | 0.002387  |
| 0.004071  | -0.044937 | 0.022836  | -0.778978 | 0.014828  |
| 0.018839  | -0.005274 | -0.014325 | 0.059930  | -0.036851 |
| 0.033943  | -0.002028 | -0.031536 | 0.245531  | 0.020979  |
| -0.004503 | -0.014038 | -0.007548 | -0.007381 | -0.001195 |
| 0.000999  | -0.000085 | -0.001114 | -0.001400 | -0.000227 |
| -0.001132 | -0.000140 | 0.001884  | 0.000537  | 0.001179  |
| 0.254689  | -0.512477 | -0.239641 | -0.016838 | -0.102563 |
| -0.008369 | 0.172105  | 0.220375  | 0.066885  | 0.043558  |
| -0.059669 | 0.230629  | 0.153941  | 0.099127  | 0.014222  |

|           |           |           |           |           |
|-----------|-----------|-----------|-----------|-----------|
| 0.191303  | -0.024576 | 0.124709  | 0.001939  | -0.003036 |
| 0.091702  | 0.017775  | -0.120831 | -0.004039 | -0.001129 |
| -0.021757 | -0.005719 | -0.030517 | 0.012684  | 0.006153  |
| 0.560739  | -0.045528 | 0.350417  | -0.004808 | -0.161885 |
| 0.002079  | 0.003506  | 0.001489  | -0.002398 | 0.014882  |
| 0.050709  | 0.034824  | 0.055733  | 0.007584  | -0.002498 |
| 0.200939  | -0.096710 | 0.328109  | 0.002725  | -0.099311 |
| -0.000444 | 0.528772  | 0.333207  | 0.036585  | 0.008176  |
| 0.329535  | 0.648451  | -0.491694 | 0.096039  | 0.010060  |
| 0.310401  | -0.471536 | -0.444412 | -0.100070 | 0.046271  |
| 0.073598  | -0.109340 | -0.009284 | 0.875687  | 0.177653  |
| -0.279224 | -0.029044 | 0.225604  | 0.060820  | -0.292193 |
| -0.118277 | -0.045952 | 0.066162  | 0.403024  | 0.055073  |
| -0.017544 | 0.021854  | 0.140970  | -0.133229 | 0.512768  |
| -0.090244 | -0.006268 | -0.000786 | -0.034222 | -0.098314 |
| 0.053861  | -0.016726 | 0.145436  | -0.125656 | 0.736573  |
| -0.012168 | 0.052473  | -0.004759 | 0.044724  | 0.069721  |
| -0.007004 | 0.048077  | 0.026538  | -0.039202 | 0.088569  |
| -0.011865 | 0.007578  | -0.024074 | 0.002264  | 0.043580  |
| 0.077191  | 0.007081  | -0.028462 | -0.022439 | -0.064250 |
| 0.116589  | 0.040631  | -0.006201 | 0.014787  | -0.062309 |
| 0.089408  | 0.074568  | -0.030163 | 0.002143  | -0.001055 |
| 0.111472  | -0.124054 | -0.092845 | 0.053047  | -0.005967 |
| 0.065462  | 0.028005  | -0.024952 | -0.015282 | -0.010793 |
| 0.030190  | 0.002772  | 0.009104  | -0.028740 | -0.000579 |
| -0.076181 | -0.025912 | 0.024963  | 0.009113  | 0.003579  |



|           |           |           |           |           |
|-----------|-----------|-----------|-----------|-----------|
| -0.010374 | -0.008300 | 0.009035  | 0.022389  | 0.005417  |
| -0.034007 | 0.015255  | 0.002503  | -0.007089 | 0.024335  |
| -0.028863 | 0.009343  | -0.014827 | -0.009584 | -0.018524 |
| 0.045596  | -0.006666 | -0.014570 | 0.002739  | -0.021836 |
| 0.012599  | 0.021509  | -0.010040 | -0.002387 | 0.002533  |
| -0.043852 | 0.083932  | 0.019974  | -0.032425 | 0.004550  |
| 0.049453  | 0.022806  | -0.017699 | -0.010156 | 0.004424  |
| -0.040230 | -0.021435 | 0.011393  | 0.008629  | 0.015111  |
| -0.078257 | -0.022725 | 0.014109  | 0.015023  | 0.002847  |
| 0.002174  | -0.001692 | 0.002338  | -0.005588 | -0.005836 |
| -0.161176 | -0.020624 | -0.013891 | 0.008111  | 0.008347  |
| -0.040450 | 0.059282  | 0.010379  | -0.023364 | 0.011721  |
| -0.050458 | -0.031150 | 0.028107  | 0.016087  | 0.019712  |
| -0.004390 | -0.000735 | 0.068822  | -0.000991 | -0.011171 |
| 0.000455  | 0.000497  | 0.002212  | -0.001163 | 0.002958  |
| 0.000971  | 0.000238  | -0.002619 | 0.000378  | 0.002664  |
| -0.384258 | 0.055152  | -0.236696 | -0.003843 | 0.023307  |
| 0.157099  | -0.032777 | 0.107466  | -0.004909 | -0.019066 |
| 0.113198  | -0.018035 | 0.022487  | 0.005280  | -0.007503 |

|           |           |           |           |           |
|-----------|-----------|-----------|-----------|-----------|
| -0.004643 | -0.002100 | 0.057684  | -0.046029 | -0.008188 |
| -0.005238 | -0.022809 | -0.008183 | 0.067569  | 0.008764  |
| 0.017661  | 0.035759  | -0.051453 | -0.039508 | 0.019037  |
| 0.065083  | 0.003168  | 0.074638  | 0.085145  | 0.004586  |
| -0.001036 | 0.000284  | 0.007437  | -0.001250 | -0.002160 |
| -0.026167 | -0.009211 | 0.019389  | 0.018140  | -0.006997 |
| -0.023537 | -0.044595 | -0.001905 | 0.021262  | -0.028033 |
| -0.136890 | 0.008452  | -0.014639 | -0.051429 | -0.016155 |
| 0.037201  | -0.000791 | 0.189613  | 0.237249  | 0.021636  |
| -0.075572 | 0.019279  | 0.205190  | 0.234694  | -0.042183 |
| -0.361676 | -0.102441 | -0.017814 | -0.081305 | 0.075248  |
| -0.243539 | -0.004261 | 0.262999  | 0.766885  | 0.017562  |
| 0.810572  | 0.249994  | 0.185169  | 0.126729  | -0.061272 |
| 0.158277  | -0.684705 | 0.381495  | 0.044422  | 0.053561  |
| -0.214626 | 0.306441  | 0.786761  | -0.417655 | -0.033269 |
| -0.175722 | 0.537808  | -0.064922 | 0.234423  | -0.026593 |
| -0.082718 | -0.130274 | -0.017204 | 0.012502  | -0.855193 |
| -0.002408 | -0.003822 | 0.013478  | 0.025804  | 0.436486  |
| -0.004786 | 0.023802  | -0.055025 | -0.146678 | 0.037979  |
| 0.065736  | 0.101005  | -0.004203 | 0.006984  | -0.111217 |
| -0.004354 | 0.026062  | -0.034775 | 0.000880  | 0.057086  |
| -0.026193 | 0.022420  | -0.041322 | 0.007066  | 0.119227  |
| -0.030389 | -0.137609 | -0.076096 | -0.004027 | 0.041999  |
| 0.014252  | 0.029168  | -0.031150 | -0.003814 | -0.014644 |
| 0.031096  | 0.004970  | -0.034227 | 0.011006  | 0.027977  |
| -0.011831 | -0.035258 | 0.033714  | -0.009823 | 0.028029  |
| -0.011575 | -0.022650 | 0.019970  | 0.008414  | 0.068528  |
| 0.005660  | 0.028374  | -0.024274 | 0.019334  | -0.046591 |
| 0.009787  | 0.007614  | -0.001718 | -0.005905 | 0.001144  |
| -0.001453 | -0.021143 | -0.005818 | -0.007347 | 0.046235  |
| -0.004442 | 0.007901  | -0.001747 | 0.007676  | 0.056000  |
| 0.016187  | 0.083679  | 0.026282  | -0.002944 | -0.017877 |
| -0.000378 | 0.026458  | -0.037480 | 0.006294  | -0.021839 |
| -0.007673 | -0.030640 | 0.026811  | -0.003296 | 0.036795  |
| -0.008579 | -0.047145 | 0.072852  | -0.015140 | 0.095023  |
| 0.008374  | -0.003689 | 0.002485  | 0.002499  | 0.004607  |
| -0.003726 | -0.022244 | 0.029008  | -0.003852 | 0.000133  |
| 0.012293  | 0.061574  | 0.031093  | -0.004302 | -0.008157 |
| -0.003584 | -0.036080 | 0.052532  | -0.008269 | 0.000137  |
| -0.000542 | -0.000999 | 0.000076  | -0.003678 | 0.002311  |
| -0.002340 | 0.002678  | 0.000140  | 0.008644  | -0.000140 |
| -0.000236 | 0.002023  | -0.002561 | -0.031747 | 0.000443  |
| -0.060296 | -0.044124 | -0.075146 | 0.041082  | 0.030945  |
| 0.016180  | 0.018231  | 0.026103  | -0.031763 | -0.004157 |
| 0.012672  | 0.006864  | 0.036951  | -0.009915 | 0.012539  |

|           |           |           |           |           |
|-----------|-----------|-----------|-----------|-----------|
| 0.011525  | 0.000227  | -0.005157 | -0.019119 | -0.000874 |
| -0.009854 | -0.006642 | 0.040495  | -0.001250 | 0.042735  |
| -0.003966 | -0.000877 | -0.034218 | 0.044368  | -0.043443 |

|           |           |           |           |           |
|-----------|-----------|-----------|-----------|-----------|
| -0.007961 | 0.124000  | -0.163657 | 0.022904  | -0.081701 |
| 0.001473  | -0.003451 | 0.008296  | -0.002586 | 0.004239  |
| 0.007240  | -0.055027 | 0.125073  | -0.006673 | 0.012534  |
| 0.022817  | -0.092399 | 0.221618  | -0.020129 | 0.044982  |
| -0.003787 | -0.271457 | 0.569258  | -0.060259 | 0.081892  |
| 0.061667  | 0.090147  | -0.122006 | 0.009280  | -0.032554 |
| -0.056426 | -0.192301 | 0.496389  | 0.033275  | -0.079039 |
| -0.012441 | -0.010353 | -0.030431 | -0.025145 | -0.063930 |
| -0.002210 | 0.172354  | -0.025836 | -0.018739 | 0.038974  |
| -0.021318 | -0.038760 | 0.143254  | 0.025475  | 0.054885  |
| 0.058287  | 0.041664  | -0.015575 | -0.042620 | 0.036145  |
| -0.006196 | -0.004465 | -0.040530 | -0.002513 | 0.097392  |
| 0.071067  | 0.034978  | -0.084995 | -0.011005 | 0.088026  |
| -0.373597 | 0.025144  | -0.030353 | 0.117835  | 0.000149  |
| -0.840595 | -0.069545 | -0.004265 | 0.136537  | -0.076934 |
| -0.055065 | 0.888413  | 0.418449  | -0.003145 | 0.001127  |
| -0.345218 | 0.039067  | -0.109564 | -0.668151 | 0.270263  |
| -0.048073 | 0.023172  | -0.042115 | 0.583110  | 0.637691  |
| 0.075128  | -0.034574 | 0.061335  | -0.339741 | 0.077614  |
| 0.046811  | 0.010658  | -0.025717 | -0.176373 | 0.467684  |
| 0.000673  | -0.005253 | 0.070204  | 0.014835  | -0.132822 |
| 0.042479  | -0.012635 | 0.017159  | -0.070369 | 0.151838  |
| -0.029662 | 0.017716  | -0.036292 | -0.013544 | -0.070973 |
| -0.018502 | -0.001317 | -0.063745 | 0.016428  | -0.087220 |
| 0.025929  | -0.046025 | 0.043277  | 0.022468  | 0.036953  |
| -0.002621 | 0.014374  | -0.002521 | 0.005447  | -0.029758 |
| -0.012521 | 0.025608  | -0.024672 | -0.019612 | -0.027137 |
| 0.004790  | -0.026430 | 0.032388  | -0.031213 | 0.023293  |
| -0.011810 | 0.006516  | -0.012908 | 0.061958  | -0.228134 |
| 0.002686  | -0.009876 | 0.030734  | 0.010245  | 0.019501  |
| -0.002152 | 0.005332  | -0.018264 | -0.022355 | 0.026252  |
| 0.004242  | 0.012838  | -0.031794 | -0.058910 | 0.029307  |
| -0.003253 | -0.010325 | -0.008532 | 0.002500  | 0.001467  |
| 0.006122  | 0.006801  | -0.020912 | -0.023017 | 0.093269  |
| -0.010520 | 0.011352  | -0.036832 | 0.060254  | -0.245689 |
| 0.011168  | 0.013654  | -0.047385 | -0.043291 | 0.192726  |
| -0.003329 | -0.098633 | 0.223420  | -0.003641 | 0.007824  |
| 0.003952  | 0.002988  | 0.001306  | -0.000297 | 0.006049  |
| -0.000818 | -0.007561 | -0.003263 | -0.001623 | 0.001269  |
| 0.009296  | -0.079397 | 0.145605  | -0.030749 | 0.126337  |
| 0.003827  | 0.020720  | -0.042598 | 0.002642  | -0.028478 |
| 0.001954  | 0.015282  | -0.032669 | 0.012921  | -0.019607 |

|           |           |           |           |           |
|-----------|-----------|-----------|-----------|-----------|
| 0.016861  | -0.012169 | -0.003949 | -0.009626 | 0.009005  |
| 0.020952  | -0.015538 | -0.009676 | -0.017600 | 0.027829  |
| 0.024650  | 0.026284  | -0.008985 | 0.018715  | -0.001423 |
| 0.002843  | 0.001768  | -0.009960 | 0.022493  | 0.004803  |
| 0.010166  | 0.001001  | 0.001132  | -0.001977 | -0.000895 |
| 0.039870  | 0.022686  | 0.010703  | -0.001203 | -0.005557 |
| 0.092577  | 0.027283  | 0.016378  | -0.000676 | -0.008234 |
| 0.091767  | 0.045381  | 0.022595  | -0.017511 | -0.014234 |
| 0.123140  | 0.030470  | 0.038710  | 0.003555  | 0.006064  |
| -0.004094 | 0.089926  | 0.003587  | 0.030960  | 0.007948  |
| -0.091116 | 0.069753  | 0.050176  | -0.040962 | 0.003138  |
| -0.035351 | -0.047051 | -0.002313 | -0.017721 | 0.000161  |
| 0.027444  | -0.062757 | -0.035740 | 0.041313  | 0.005745  |
| -0.144403 | 0.041070  | 0.008140  | -0.075865 | 0.010311  |
| -0.011521 | -0.073846 | 0.001585  | 0.012356  | 0.001609  |
| 0.048657  | -0.030556 | 0.009079  | 0.005205  | -0.006476 |
| 0.015967  | -0.147294 | -0.064610 | 0.199068  | -0.019357 |
| 0.080884  | -0.094077 | -0.031164 | 0.054731  | 0.009453  |
| 0.015374  | 0.012341  | -0.011863 | 0.020380  | -0.008296 |
| -0.192532 | 0.274488  | 0.119881  | -0.258919 | -0.018701 |
| -0.292609 | 0.063965  | -0.029711 | -0.032148 | 0.071321  |
| -0.376760 | -0.382886 | -0.469818 | 0.417881  | 0.219168  |
| 0.586112  | -0.278269 | -0.038895 | -0.003421 | 0.019197  |
| -0.199524 | -0.723852 | 0.440260  | -0.406670 | -0.039607 |
| -0.125104 | 0.118906  | 0.695044  | 0.552834  | -0.097931 |
| 0.141658  | -0.034799 | 0.249834  | 0.173253  | 0.815387  |
| 0.053445  | -0.224793 | -0.036376 | 0.344943  | -0.333110 |

|           |           |           |           |           |
|-----------|-----------|-----------|-----------|-----------|
| -0.028292 | 0.066167  | -0.014475 | -0.203113 | 0.131301  |
| -0.048375 | 0.012796  | 0.015077  | 0.057450  | 0.074541  |
| -0.045434 | -0.009930 | 0.078405  | 0.017355  | -0.148345 |
| -0.073935 | -0.013831 | -0.009750 | 0.056362  | -0.192163 |
| 0.001462  | 0.092226  | -0.003680 | 0.017646  | 0.007199  |
| -0.104855 | 0.004746  | -0.031473 | -0.039353 | 0.076689  |
| 0.070571  | -0.013254 | 0.015465  | 0.038205  | -0.102161 |
| 0.105069  | -0.004468 | 0.027714  | 0.164583  | -0.234873 |
| 0.000688  | -0.004813 | 0.008965  | 0.013662  | 0.016549  |
| 0.092647  | -0.046452 | 0.017139  | -0.007096 | -0.031645 |
| 0.277090  | 0.120512  | -0.016697 | 0.038688  | 0.030569  |
| 0.324279  | -0.113805 | 0.010784  | -0.035978 | -0.023299 |
| 0.034875  | -0.002893 | 0.000190  | -0.000220 | -0.005715 |
| 0.000253  | 0.008030  | -0.011125 | -0.000241 | -0.003966 |
| -0.000204 | 0.000912  | -0.001272 | 0.010613  | 0.007795  |
| -0.072649 | -0.000417 | 0.016912  | -0.021254 | -0.021192 |
| 0.032454  | -0.003889 | -0.004900 | 0.000674  | 0.016449  |
| 0.013242  | 0.001899  | -0.005410 | 0.003019  | 0.007464  |

|           |           |           |           |           |
|-----------|-----------|-----------|-----------|-----------|
| 0.004613  | 0.001244  | 0.043594  | -0.001225 | -0.004282 |
| 0.000717  | 0.020108  | 0.285497  | -0.013011 | -0.012000 |
| -0.009840 | -0.003349 | 0.037026  | -0.007565 | -0.012515 |
| 0.007623  | -0.004421 | -0.078317 | 0.008594  | 0.003736  |
| 0.001143  | -0.000002 | 0.005199  | -0.025768 | 0.013096  |
| 0.011354  | 0.001599  | -0.000519 | 0.006776  | -0.020409 |
| 0.021543  | 0.005639  | -0.000210 | -0.021545 | -0.016388 |
| 0.031434  | -0.006624 | 0.012466  | -0.007986 | -0.005940 |
| 0.005690  | 0.002443  | -0.035258 | -0.051576 | -0.064604 |
| 0.040600  | 0.005134  | -0.010515 | 0.024591  | 0.025773  |
| -0.015937 | 0.002603  | 0.013708  | 0.030248  | 0.039654  |
| -0.040680 | -0.005389 | 0.011470  | 0.013138  | 0.013106  |
| -0.005591 | -0.016621 | -0.008213 | -0.004833 | -0.010358 |
| -0.018054 | 0.019610  | 0.009359  | 0.038496  | 0.059335  |
| -0.059161 | 0.015884  | -0.009629 | -0.005908 | -0.009532 |
| 0.024789  | -0.034300 | -0.002634 | -0.034286 | -0.021051 |
| 0.022056  | -0.044751 | -0.000184 | -0.006882 | -0.008685 |
| -0.122391 | -0.020283 | -0.013445 | -0.028489 | -0.028823 |
| 0.005054  | 0.037552  | -0.000672 | -0.002979 | -0.001464 |
| 0.154042  | 0.091026  | 0.031423  | 0.057431  | 0.074002  |
| 0.160172  | 0.022104  | 0.025009  | 0.084031  | 0.117703  |
| -0.095112 | -0.041921 | -0.000832 | 0.079615  | 0.111995  |
| -0.077964 | -0.012366 | -0.005927 | 0.001732  | -0.001927 |
| 0.078479  | -0.040764 | 0.023070  | 0.044811  | 0.058365  |
| -0.261214 | 0.024635  | -0.012898 | 0.042636  | 0.045033  |
| 0.356065  | 0.068820  | -0.051000 | -0.024569 | -0.047627 |
| 0.189713  | 0.605700  | 0.095607  | 0.015559  | -0.007176 |
| -0.033394 | 0.679350  | 0.310716  | -0.022318 | -0.020980 |
| -0.064655 | -0.286300 | 0.838904  | 0.021519  | 0.041188  |
| -0.084718 | -0.086170 | 0.029237  | 0.159265  | 0.212408  |
| 0.567735  | -0.080775 | -0.010552 | 0.118033  | 0.289863  |
| -0.101409 | -0.010770 | 0.061549  | 0.137036  | -0.013500 |
| -0.038637 | 0.015898  | -0.072876 | 0.646081  | -0.138790 |
| 0.153059  | -0.053688 | 0.066841  | 0.490148  | -0.648596 |
| 0.502622  | -0.215561 | 0.128471  | -0.213750 | -0.148076 |
| -0.005798 | -0.026743 | 0.002192  | 0.003271  | -0.001961 |
| -0.061607 | -0.015829 | -0.157353 | 0.096093  | 0.115421  |
| 0.125278  | 0.018692  | 0.016416  | 0.410638  | 0.547735  |
| -0.175357 | -0.017932 | 0.141345  | 0.168740  | 0.198042  |
| -0.003060 | 0.001330  | 0.000839  | 0.006061  | 0.007184  |
| 0.005746  | -0.009054 | 0.002046  | 0.000056  | 0.001136  |
| 0.003408  | -0.003635 | -0.000034 | 0.000294  | 0.000042  |
| 0.004127  | -0.004598 | -0.096100 | 0.013117  | 0.030264  |
| 0.000994  | 0.002921  | 0.070240  | -0.006946 | -0.013227 |
| -0.002521 | 0.000275  | 0.039263  | -0.003041 | -0.005440 |

|           |           |           |           |           |
|-----------|-----------|-----------|-----------|-----------|
| 0.004380  | 0.001379  | -0.004507 | -0.011065 | 0.001163  |
| 0.008023  | 0.026210  | -0.035460 | -0.007270 | 0.000943  |
| -0.007760 | -0.024468 | -0.005511 | 0.009012  | 0.000949  |
| -0.007767 | -0.039079 | 0.029787  | -0.044350 | -0.006506 |

|           |           |           |           |           |
|-----------|-----------|-----------|-----------|-----------|
| -0.000400 | 0.002026  | -0.002198 | 0.000348  | 0.000207  |
| -0.004778 | -0.003567 | -0.005995 | 0.026445  | 0.001115  |
| -0.004315 | 0.001210  | -0.013714 | 0.037828  | 0.000890  |
| 0.004589  | 0.013425  | -0.022568 | 0.094396  | 0.002724  |
| -0.011094 | -0.020022 | 0.011963  | -0.009901 | 0.000937  |
| -0.031719 | -0.072711 | 0.000209  | 0.070422  | 0.000806  |
| -0.023384 | -0.015820 | -0.004989 | -0.004647 | 0.008848  |
| 0.018208  | 0.043595  | -0.006377 | -0.029917 | -0.000461 |
| 0.029491  | 0.028248  | 0.003612  | -0.000277 | -0.004907 |
| -0.015518 | 0.032382  | -0.021096 | 0.018249  | -0.000774 |
| 0.030861  | 0.076313  | 0.005275  | -0.049866 | 0.000240  |
| 0.023957  | 0.020334  | -0.003453 | 0.035801  | 0.004256  |
| 0.057940  | -0.021718 | 0.042809  | -0.055961 | -0.001001 |
| 0.023267  | 0.010051  | 0.027355  | -0.131984 | -0.007153 |
| -0.009327 | -0.004945 | 0.005449  | -0.012026 | 0.014586  |
| -0.076333 | 0.001657  | -0.076091 | 0.207481  | 0.007335  |
| -0.008585 | -0.037571 | -0.021895 | 0.184026  | -0.002684 |
| 0.083020  | -0.092820 | 0.100218  | -0.067715 | -0.009056 |
| 0.087415  | 0.174619  | -0.005247 | -0.088595 | -0.004053 |
| 0.001953  | -0.008405 | -0.033573 | 0.013567  | 0.000143  |
| 0.007219  | 0.015986  | 0.043277  | -0.226753 | -0.011009 |
| -0.011742 | -0.064387 | 0.016218  | 0.198768  | -0.017357 |
| -0.206027 | 0.108490  | -0.223431 | 0.408549  | 0.018391  |
| 0.305713  | -0.181035 | 0.212068  | -0.410439 | 0.015931  |
| -0.120281 | 0.190466  | -0.077099 | 0.060756  | -0.011641 |
| 0.622108  | -0.167632 | 0.292311  | 0.427213  | -0.020972 |
| -0.295238 | 0.014992  | 0.370069  | -0.377430 | -0.000468 |
| -0.238130 | -0.519566 | 0.074274  | 0.138749  | -0.000201 |
| 0.063653  | -0.075301 | -0.576919 | -0.239560 | 0.016495  |
| 0.011158  | 0.108345  | 0.437536  | 0.098869  | -0.016716 |
| 0.387559  | -0.393037 | -0.335751 | -0.138241 | 0.008449  |
| 0.008719  | 0.005301  | 0.028424  | 0.012526  | 0.998581  |
| -0.091492 | -0.160544 | 0.040155  | 0.011873  | -0.001786 |
| 0.188924  | 0.272588  | -0.044220 | -0.009532 | 0.000184  |
| -0.299624 | -0.530696 | 0.059081  | 0.043793  | 0.001779  |
| -0.010898 | -0.009781 | 0.000093  | 0.018884  | 0.001313  |
| -0.013226 | 0.007265  | 0.017065  | -0.001280 | 0.007408  |
| -0.010743 | 0.005785  | -0.004523 | -0.000613 | -0.001876 |
| 0.018342  | 0.045980  | -0.012236 | 0.049502  | 0.002096  |
| 0.000412  | -0.011200 | -0.003272 | -0.021890 | 0.000642  |
| -0.000268 | -0.009208 | -0.002270 | -0.012181 | 0.000001  |

|           |           |           |           |           |
|-----------|-----------|-----------|-----------|-----------|
| -0.112988 | 0.011284  | -0.010678 | 0.004063  | -0.001768 |
| -0.715312 | 0.062486  | -0.064863 | -0.000323 | 0.002363  |
| -0.094124 | -0.023594 | -0.013589 | -0.000946 | -0.003540 |
| 0.196985  | -0.033630 | 0.023202  | -0.016593 | 0.004882  |
| -0.015625 | 0.000319  | -0.005749 | 0.001488  | 0.000036  |
| 0.001076  | -0.012555 | -0.006910 | 0.041202  | 0.000957  |
| -0.004295 | -0.013619 | -0.016797 | 0.091670  | 0.002978  |
| -0.024026 | -0.001188 | -0.005187 | 0.187544  | -0.001412 |
| 0.056477  | -0.051693 | -0.056687 | -0.071325 | 0.007037  |
| 0.052845  | -0.064295 | 0.044648  | 0.100544  | 0.006250  |
| 0.002587  | -0.005960 | 0.044549  | -0.012591 | -0.003429 |
| -0.028846 | 0.049923  | 0.007467  | -0.008811 | 0.028401  |
| 0.000836  | 0.033079  | -0.017103 | 0.041401  | 0.003746  |
| 0.003737  | 0.041558  | 0.055135  | -0.007243 | 0.003319  |
| 0.007818  | 0.069504  | -0.023043 | -0.005333 | -0.011947 |
| 0.012784  | 0.012894  | -0.030228 | -0.018906 | 0.006474  |
| 0.006554  | 0.009828  | -0.010742 | -0.011310 | -0.000857 |
| 0.009944  | 0.009988  | -0.033471 | 0.010505  | -0.001397 |
| 0.001558  | -0.008810 | -0.002296 | 0.005191  | 0.003423  |
| -0.006563 | -0.032817 | 0.114313  | -0.030017 | -0.000082 |
| -0.008697 | -0.047346 | 0.187751  | -0.020245 | 0.000162  |
| -0.019450 | -0.112412 | 0.161456  | -0.000831 | -0.004702 |
| 0.069305  | 0.395140  | 0.178757  | 0.009647  | -0.001408 |
| -0.002901 | -0.060157 | 0.151807  | 0.006814  | 0.001959  |
| -0.022352 | -0.019417 | 0.083992  | -0.002730 | -0.005092 |
| 0.009579  | 0.045662  | -0.136578 | -0.001824 | -0.009585 |
| 0.028795  | 0.048349  | -0.084963 | 0.001916  | -0.004055 |
| 0.075232  | -0.022623 | 0.043442  | 0.005257  | 0.007047  |

|           |           |           |           |           |
|-----------|-----------|-----------|-----------|-----------|
| 0.185006  | 0.058074  | -0.069131 | 0.002455  | -0.003032 |
| 0.026940  | 0.240204  | -0.364336 | 0.003680  | 0.008477  |
| 0.019416  | 0.275670  | -0.272919 | 0.011931  | 0.001370  |
| -0.008595 | 0.539290  | 0.486035  | 0.005529  | 0.000196  |
| 0.036248  | 0.200522  | -0.293576 | 0.007435  | -0.004607 |
| -0.022577 | -0.213813 | 0.151284  | -0.006362 | 0.003384  |
| 0.000497  | -0.142120 | 0.184183  | -0.012502 | -0.000053 |
| 0.000692  | 0.001839  | -0.001405 | 0.000824  | 0.003803  |
| -0.480266 | -0.107717 | -0.056491 | 0.006574  | 0.001283  |
| -0.031005 | -0.248166 | 0.405013  | -0.009779 | -0.001074 |
| 0.162677  | -0.432409 | -0.237437 | 0.014930  | 0.001663  |
| 0.008373  | 0.010013  | -0.014702 | -0.965607 | 0.000175  |
| -0.001475 | -0.001032 | -0.000466 | 0.000019  | -0.272370 |
| -0.000405 | 0.000307  | 0.001031  | 0.000058  | 0.961382  |
| 0.253738  | 0.028740  | 0.034503  | 0.039929  | 0.001395  |
| -0.183067 | 0.001694  | -0.021905 | -0.009523 | -0.001400 |
| -0.101168 | -0.000646 | -0.010536 | -0.002106 | -0.001700 |

|           |           |           |           |           |
|-----------|-----------|-----------|-----------|-----------|
| -0.000378 | 0.024741  | 0.142099  | -0.090974 | -0.120108 |
| -0.000881 | 0.012386  | 0.039852  | -0.035010 | -0.040686 |
| 0.000603  | 0.040242  | -0.067161 | 0.024107  | -0.004529 |
| -0.000240 | 0.049060  | 0.067905  | 0.116018  | 0.010003  |
| -0.000009 | 0.991243  | 0.068029  | -0.026400 | 0.024185  |
| -0.000273 | -0.084337 | 0.936623  | -0.002157 | 0.049761  |
| -0.000442 | -0.006108 | -0.257338 | 0.021076  | -0.009456 |
| -0.001688 | 0.003060  | -0.088548 | -0.000726 | -0.022347 |
| 0.000492  | -0.008159 | -0.053011 | -0.004438 | 0.030503  |
| 0.000295  | -0.000419 | -0.047486 | -0.019739 | 0.013106  |
| 0.000111  | 0.001992  | -0.007301 | -0.000751 | 0.008297  |
| 0.001179  | 0.001960  | -0.004077 | -0.014499 | -0.001592 |
| 0.001349  | -0.000103 | 0.004512  | 0.003116  | 0.003210  |
| 0.000257  | -0.006825 | -0.015544 | 0.000705  | 0.009635  |
| -0.000434 | -0.001209 | -0.007364 | -0.002511 | 0.002654  |
| -0.005756 | -0.008877 | -0.007160 | 0.020083  | -0.000321 |
| 0.001082  | 0.001075  | 0.003378  | 0.024417  | 0.001987  |
| 0.003877  | -0.001102 | 0.002129  | 0.000185  | 0.005882  |
| -0.001224 | -0.000945 | -0.000170 | 0.002659  | 0.000039  |
| -0.001094 | -0.001307 | -0.006064 | -0.004812 | -0.003484 |
| -0.004031 | -0.000804 | -0.003571 | -0.023536 | 0.003882  |
| -0.003423 | 0.001976  | 0.000750  | -0.008211 | 0.003792  |
| -0.000218 | -0.005247 | -0.003230 | -0.013329 | -0.007393 |
| 0.012034  | 0.001038  | -0.001421 | -0.001173 | 0.000002  |
| 0.004953  | 0.001028  | 0.000381  | -0.007301 | 0.000069  |
| 0.003651  | 0.001301  | 0.000980  | 0.004427  | -0.005757 |
| 0.004771  | 0.000143  | -0.002024 | 0.006055  | 0.001858  |
| 0.008251  | -0.000407 | 0.000651  | 0.009949  | -0.005818 |
| -0.005916 | -0.002820 | -0.001405 | 0.019604  | -0.006769 |
| 0.008076  | 0.000069  | -0.001637 | -0.007255 | 0.001238  |
| -0.016062 | -0.002719 | -0.000101 | -0.003588 | 0.001059  |
| 0.001172  | 0.007314  | 0.000534  | 0.005320  | 0.005319  |
| 0.010373  | 0.016616  | -0.010173 | -0.005825 | -0.001138 |
| -0.008478 | 0.023451  | -0.013462 | 0.004779  | -0.000678 |
| 0.008174  | -0.003379 | 0.000649  | 0.001788  | -0.003534 |
| -0.006963 | 0.000162  | -0.000185 | -0.000447 | -0.000844 |
| -0.001911 | -0.007450 | -0.003003 | 0.058695  | -0.022046 |
| -0.000069 | 0.002787  | 0.001883  | 0.001223  | 0.004464  |
| -0.000643 | 0.002865  | 0.002405  | -0.009715 | 0.005634  |
| -0.000084 | 0.000519  | 0.000945  | 0.011371  | -0.003732 |
| 0.961626  | -0.000097 | 0.000119  | -0.000240 | -0.000185 |
| 0.272475  | -0.000082 | -0.000035 | 0.000857  | -0.000443 |
| 0.000169  | 0.057659  | 0.066972  | 0.445990  | 0.201643  |
| 0.000164  | -0.028839 | -0.052212 | 0.329875  | 0.847179  |
| 0.000023  | 0.007976  | 0.004204  | 0.812735  | -0.467884 |

9. The correlation function for this complex, with and without the damping factor is given in Figure S1

10. Diabatic coupling as a function of D (in au) (as seen in Figure S5c (red curve))

3.80 0.0000000000000000E+000  
 3.75 8.203380098048892E-008  
 3.70 1.969566802124054E-007  
 3.65 3.595989896334144E-007  
 3.60 5.785105253478750E-007  
 3.55 8.551926109514758E-007  
 3.50 1.188774288422392E-006  
 3.45 1.579096781928937E-006  
 3.40 2.028149223021284E-006  
 3.35 2.537981017733336E-006  
 3.30 3.109979878133577E-006  
 3.25 3.744116599587323E-006  
 3.20 4.438067341846056E-006  
 3.15 5.186284487536107E-006  
 3.10 5.978848088278649E-006  
 3.05 6.799747207765892E-006  
 3.00 7.625280474457299E-006  
 2.95 8.421009218229659E-006  
 2.90 9.138880366846559E-006  
 2.85 9.711908744107661E-006  
 2.80 1.004805761604361E-005  
 2.75 1.009729390888059E-005  
 2.70 1.029111762259797E-005  
 2.65 1.118573415114458E-005  
 2.60 1.310439024274072E-005  
 2.55 1.651212227350761E-005  
 2.50 2.208856453131599E-005  
 2.45 3.084967639790852E-005  
 2.40 4.435079141871678E-005  
 2.35 6.505772342933503E-005  
 2.30 9.712167442403280E-005  
 2.25 1.485787315244304E-004  
 2.20 2.420212264199706E-004

11. Boltzmann factor as a function of D  
(as seen in Figure S6c (red curve))

3.80 1.000000000000000  
 3.75 1.00499276645464  
 3.70 1.00190918596945  
 3.65 0.988516287911033  
 3.60 0.962979210834943  
 3.55 0.923700303349582  
 3.50 0.869652513600425  
 3.45 0.800833561505537  
 3.40 0.718485281648624  
 3.35 0.625229918807414  
 3.30 0.524936652926016  
 3.25 0.422709685197629  
 3.20 0.324230868685155  
 3.15 0.234938303659945  
 3.10 0.159293778108005  
 3.05 9.992293503535825E-002  
 3.00 5.720267883523220E-002  
 2.95 2.941679828354223E-002  
 2.90 1.333271828731101E-002  
 2.85 5.210821145018842E-003  
 2.80 1.711855078904717E-003  
 2.75 4.589946823603000E-004  
 2.70 9.716814451182585E-005  
 2.65 1.564980005857877E-005  
 2.60 1.840571103480987E-006  
 2.55 1.512234023085287E-007  
 2.50 8.285243341204754E-009  
 2.45 2.886652258346095E-010  
 2.40 6.105621630922543E-012  
 2.35 7.520932937901166E-014  
 2.30 5.211604436370388E-016  
 2.25 1.971748227240822E-018  
 2.20 3.839128487437594E-021

12. Value of FCWD for this complex is 37.6702355  
(numerical integration of the damped correlation  
function performed using SIMPSONS method)

11. Photosensitization rate constant as a  
function of D, along the to56 direction  
(as seen in Figure 5c (red curve))

|      |             |
|------|-------------|
| 3.80 | 0           |
| 3.75 | 11901.6     |
| 3.70 | 62709.9     |
| 3.65 | 200266      |
| 3.60 | 515370      |
| 3.55 | 1.14197e+06 |
| 3.50 | 2.23711e+06 |
| 3.45 | 3.93084e+06 |
| 3.40 | 6.24946e+06 |
| 3.35 | 9.01462e+06 |
| 3.30 | 1.17765e+07 |
| 3.25 | 1.38525e+07 |
| 3.20 | 1.45134e+07 |
| 3.15 | 1.3373e+07  |
| 3.10 | 1.08727e+07 |
| 3.05 | 7.87917e+06 |
| 3.00 | 5.17979e+06 |
| 2.95 | 3.1441e+06  |
| 2.90 | 1.72853e+06 |
| 2.85 | 825054      |
| 2.80 | 323630      |
| 2.75 | 98913.4     |
| 2.70 | 24263.8     |
| 2.65 | 5001.69     |
| 2.60 | 838.441     |
| 2.55 | 108.145     |
| 2.50 | 10.1765     |
| 2.45 | 0.661892    |
| 2.40 | 0.0284819   |
| 2.35 | 0.000788571 |
| 2.30 | 1.37617e-05 |
| 2.25 | 1.48478e-07 |
| 2.20 | 9.86149e-10 |
